# Supplementary material for: Can a standards-based approach improve access to and quality of primary health care? Findings from an end-of-project evaluation in Ghana
Source: PLOS journal article supplement (doi:10.1371/journal.pone.0216589), 2019-05-10
Supplement: S2 (10.1371/journal.pone.0216589.s002) [file journal.pone.0216589.s002]

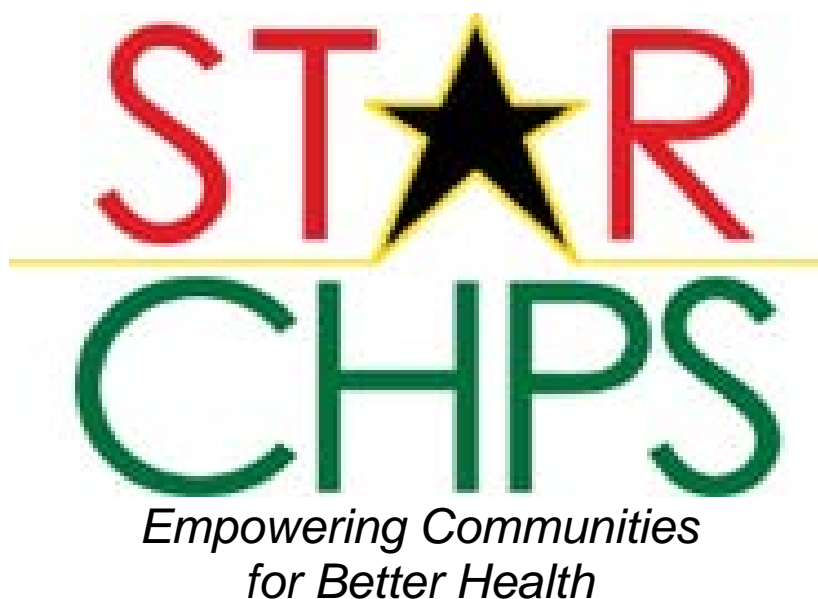

# STAR CHPS ASSESSMENT

## Community Health Management Committee tool

Funded by:

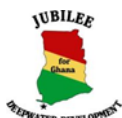

Implemented by:

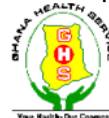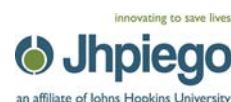

*STAR CHPS mission is to strengthen communities and boost superior performance and efficiency at CHPS Zones in the 6 coastal districts in the Western Region, thus increasing access to high quality primary healthcare to over a million residents.*

***District:***

***CHPS Zone:***

***Assessor(s):***

***Date:***

---

# Compendium of Performance Standards for Community Health Planning and Services (CHPS)

(Draft updated 11/29/2013)

| Categories and Thematic Areas                        | Total standards | Total standards achieved | % |
|------------------------------------------------------|-----------------|--------------------------|---|
| <b>1. Standards for Community Health Officer</b>     |                 |                          |   |
| <b>A. Basic Clinical Services</b>                    |                 |                          |   |
| <b>A1. Child Health</b>                              |                 |                          |   |
| 1. Immunization                                      | 5               |                          |   |
| 2. Nutrition, Breastfeeding and Growth Monitoring    | 8               |                          |   |
| 3. IMNCI – Children less than 2 months up to 5 years | 9               |                          |   |
| <b>A2. Reproductive Health</b>                       |                 |                          |   |
| 4. Family Planning                                   | 5               |                          |   |
| 5. HIV and STI                                       | 9               |                          |   |
| 6. Antenatal Care                                    | 10              |                          |   |
| 7. Safe Emergency Delivery and Newborn Resuscitation | 6               |                          |   |
| 8. Post-natal Care and Essential Newborn Care        | 4               |                          |   |
| <b>A3. Illnesses and Emergencies</b>                 |                 |                          |   |
| 9. Infection Prevention                              | 7               |                          |   |
| 10. Malaria                                          | 4               |                          |   |
| 11. TB                                               | 2               |                          |   |
| 12. Hypertension                                     | 2               |                          |   |
| 13. Diabetes                                         | 2               |                          |   |
| 14. Sickle cell                                      | 2               |                          |   |
| 15. Elephantiasis                                    | 2               |                          |   |
| 16. Mental Health                                    | 2               |                          |   |
| 17. Diarrhoea                                        | 2               |                          |   |
| 18. Intestinal Worms                                 | 2               |                          |   |
| 19. Acute Respiratory Tract Infections               | 2               |                          |   |
| 20. First Aid and Home Emergencies                   | 11              |                          |   |
| <b>1. Community Linkages and Outreach Services</b>   |                 |                          |   |
| 21. Health Promotion and Health Education            | 5               |                          |   |

|                                                                 |   |  |  |
|-----------------------------------------------------------------|---|--|--|
| 22. Disease Surveillance                                        | 4 |  |  |
| 23. Home Visits                                                 | 2 |  |  |
| 24. School Health                                               | 6 |  |  |
| 25. Outreach Activities                                         | 2 |  |  |
| 26. Supporting Community Health Volunteers                      | 1 |  |  |
| 27. Working with the Community Health Committee                 | 4 |  |  |
| <b>2. Management of Activities, Services and Logistics</b>      |   |  |  |
| 28. Planning, implementing and managing activities              | 2 |  |  |
| 29. Logistics Management                                        | 5 |  |  |
| 30. Financial Management                                        | 8 |  |  |
| 31. Data collection, reporting, analysis and use                | 5 |  |  |
| <b>32. Standards for Community Health Volunteers</b>            |   |  |  |
| 32. Disease prevention and environmental sanitation             | 1 |  |  |
| 33. Home visiting                                               | 4 |  |  |
| 34. Home management of minor ailments                           | 2 |  |  |
| 35. Community Outreaches                                        | 7 |  |  |
| 36. Equipment, logistics and supplies                           | 2 |  |  |
| <b>37. Standards for Community Health Committee</b>             |   |  |  |
| 37. Governance, membership and operation                        | 5 |  |  |
| 38. Selection and supervision of community volunteers           | 2 |  |  |
| 39. Welfare of CHO (include Security)                           | 2 |  |  |
| 40. Facility maintenance                                        | 2 |  |  |
| 41. Resource mobilization and management                        | 3 |  |  |
| <b>42. Standards for District Health Management Team (DHMT)</b> |   |  |  |
| 41. Management of CHPS Implementation                           | 9 |  |  |
| 42. Support to CHO                                              | 3 |  |  |
| 43. Equipment                                                   | 3 |  |  |

## Gaps

[illegible]

### ACTION PLAN

| Gap Identified | Action to be taken | Person(s) responsible | Support needed | When will action be completed |
|----------------|--------------------|-----------------------|----------------|-------------------------------|
|                |                    |                       |                |                               |
|                |                    |                       |                |                               |
|                |                    |                       |                |                               |
|                |                    |                       |                |                               |
|                |                    |                       |                |                               |

## District Health Management Team: 42) CHPS Implementation 43) CHO Support 44) CHPS Implementation Steps

| 42   | Management of CHPS Implementation                                                   |                                                                                                                                | Yes, No, N/A | Comments |
|------|-------------------------------------------------------------------------------------|--------------------------------------------------------------------------------------------------------------------------------|--------------|----------|
| 42.1 | Develops annual workplan for CHPS                                                   | <b>Verify by observation / interview:</b>                                                                                      |              |          |
|      |                                                                                     | A written plan for CHPS implementation                                                                                         |              |          |
|      |                                                                                     | Schedules support visits to CHPS Zones                                                                                         |              |          |
|      |                                                                                     | Mobilizes and allocates resources to CHPS Zones                                                                                |              |          |
|      |                                                                                     | Organizes performance reviews                                                                                                  |              |          |
| 42.2 | Has institutionalized key actions to support the achievement of the CHPS milestones | <b>Verify by observation / interview / record review how the DHMT has engaged actively to implement the following actions:</b> |              |          |
|      |                                                                                     | Planning for CHPS implementation                                                                                               |              |          |
|      |                                                                                     | Community entry process                                                                                                        |              |          |
|      |                                                                                     | Community health compound                                                                                                      |              |          |
|      |                                                                                     | Provision of Essential Equipment                                                                                               |              |          |
|      |                                                                                     | Posting of CHOs                                                                                                                |              |          |
| 42.3 | Plans and conducts supervision of CHPS Zones                                        | <b>Verify by observation / interview:</b>                                                                                      |              |          |
|      |                                                                                     | Develops bi-annual schedule for supervision                                                                                    |              |          |
|      |                                                                                     | Informs CHPS Zone of impending visit                                                                                           |              |          |
|      |                                                                                     | Prepares all logistics needed to undertake the visit (checklist, SOPs, mobilization of logistics, etc.)                        |              |          |
|      |                                                                                     | Conducts supervision by engaging in in-depth supervision and on-the-job training using appropriate tool                        |              |          |
|      |                                                                                     | Documents all findings                                                                                                         |              |          |
|      |                                                                                     | Writes report                                                                                                                  |              |          |
| 42.4 | Takes actions in the CHPS implementation process                                    | <b>Verify by observation / interview / record review:</b>                                                                      |              |          |
|      |                                                                                     | Knows the exact status (achievement of steps) of each CHPS                                                                     |              |          |
|      |                                                                                     | Organizes quarterly meetings with CHOs, CHMCs and CHVs                                                                         |              |          |
|      |                                                                                     | Develops bi-annual schedule for supervision                                                                                    |              |          |
|      |                                                                                     | Outlines achievements and challenges                                                                                           |              |          |

|      |                                                                                  |                                                                                                              |  |  |
|------|----------------------------------------------------------------------------------|--------------------------------------------------------------------------------------------------------------|--|--|
|      |                                                                                  | Develops action plans to solve challenges                                                                    |  |  |
|      |                                                                                  | Writes minutes of meetings                                                                                   |  |  |
|      |                                                                                  | Sets date for next meeting                                                                                   |  |  |
| 42.5 | Outlines the progress on the 15 implementation steps for each CHPS zone          | <b>Verify by interview / observation that CHMC:</b>                                                          |  |  |
|      |                                                                                  | Plans for CHPS have been developed                                                                           |  |  |
|      |                                                                                  | Communities have been consulted and health workers sensitized                                                |  |  |
|      |                                                                                  | Health workers have had (a series of) dialogue sessions with community leadership                            |  |  |
|      |                                                                                  | Community information durbars have been held                                                                 |  |  |
|      |                                                                                  | CHOs have been selected and trained                                                                          |  |  |
|      |                                                                                  | Community Health Committee members have been selected and oriented a durbar has been held for their approval |  |  |
|      |                                                                                  | A Community Profile has been compiled                                                                        |  |  |
|      |                                                                                  | Community Health Compound has been constructed                                                               |  |  |
|      |                                                                                  | Logistics for placing the CHO in the community have been mobilized                                           |  |  |
|      |                                                                                  | A Durbar has been held to formally launch the CHO program                                                    |  |  |
|      |                                                                                  | Community Health Volunteers have been selected                                                               |  |  |
|      |                                                                                  | Durbars have been held for the approval of CHV                                                               |  |  |
|      |                                                                                  | The CHVs have been trained                                                                                   |  |  |
|      |                                                                                  | Logistics (Resources) have been mobilized for equipping of Community Health Volunteers                       |  |  |
|      |                                                                                  | A Durbar has been organized for approval of Community Health Volunteers                                      |  |  |
| 42.6 | Community Health Management Committee members are selected according to protocol | <b>Verify by observation / interview / record review that the following are members of the CHMC:</b>         |  |  |
|      |                                                                                  | CHO                                                                                                          |  |  |
|      |                                                                                  | Representative from traditional council                                                                      |  |  |
|      |                                                                                  | A herbalist                                                                                                  |  |  |
|      |                                                                                  | Teacher                                                                                                      |  |  |
|      |                                                                                  | TBA                                                                                                          |  |  |
|      |                                                                                  | Volunteer (optional)                                                                                         |  |  |
|      |                                                                                  | Chemical Seller                                                                                              |  |  |
|      |                                                                                  | Local agricultural association leader (Fishermen or farmers' association, etc.)                              |  |  |
|      |                                                                                  | Community environmental health and sanitation representative (or its equivalent)                             |  |  |
|      |                                                                                  | Assembly member                                                                                              |  |  |
|      |                                                                                  | Women's group representative                                                                                 |  |  |
|      |                                                                                  | Opinion leader                                                                                               |  |  |

|      |                                                                                        |                                                                                                                                                                                                                  |  |  |
|------|----------------------------------------------------------------------------------------|------------------------------------------------------------------------------------------------------------------------------------------------------------------------------------------------------------------|--|--|
|      |                                                                                        | Muslim or Religious representative                                                                                                                                                                               |  |  |
| 42.7 | CHVs are selected according to protocol                                                | <b>Verify by interview / observation:</b>                                                                                                                                                                        |  |  |
|      |                                                                                        | CHMC members hold consultations with Community Chief to identify community youth with good character from good homes to be trained as volunteers                                                                 |  |  |
|      |                                                                                        | CHMC members conduct background search on probable candidates and make suggestions for the consideration of the Chief                                                                                            |  |  |
|      |                                                                                        | CHMC members consult with the Chief to vet the names                                                                                                                                                             |  |  |
|      |                                                                                        | Candidates are shortlisted for presentation at a durbar for approval                                                                                                                                             |  |  |
|      |                                                                                        | CHMC members organize a community durbar to present the shortlisted candidates for approval                                                                                                                      |  |  |
|      |                                                                                        | CHMC members liaise with health authorities to ensure the approved volunteers are trained                                                                                                                        |  |  |
|      |                                                                                        | CHMC members continue to liaise with the CHO to ensure training of the Volunteers and their presentation at post-training durbar where their roles, responsibilities, dos and don'ts are spelled out to everyone |  |  |
| 42.8 | DHMT ensures that CHPS Zones are accredited to NHIS                                    | <b>Verify by interviewing/observing</b>                                                                                                                                                                          |  |  |
|      |                                                                                        | DHMT applies to NHIS for accreditation of CHPS zone                                                                                                                                                              |  |  |
|      |                                                                                        | DHMT pays for the fee to NHIS                                                                                                                                                                                    |  |  |
|      |                                                                                        | DHMT ensures that all requirements needed for the accreditation is put in place                                                                                                                                  |  |  |
|      |                                                                                        | DHMT invites NHIS team to inspect the facility                                                                                                                                                                   |  |  |
|      |                                                                                        | Facility is accredited if they meet the the required criteria                                                                                                                                                    |  |  |
| 42.9 | DHMT assists CHPS Zones with logistics                                                 | <b>Verify by interviewing/observing</b>                                                                                                                                                                          |  |  |
|      |                                                                                        | DHMT/Sub-districts estimates logistics for CHPS zones on the following: Equipment; Drugs; Supplies; Vaccines                                                                                                     |  |  |
|      |                                                                                        | CHPS zones informed to request for the items                                                                                                                                                                     |  |  |
|      |                                                                                        | CHO sends requisition to DHMT to countersigning and authorization                                                                                                                                                |  |  |
|      |                                                                                        | CHO receivers logistics from store                                                                                                                                                                               |  |  |
|      |                                                                                        | CHO documents items received in the appropriate books and tallies                                                                                                                                                |  |  |
| 43   | <b>Support to CHO</b>                                                                  |                                                                                                                                                                                                                  |  |  |
| 43.1 | Organizes orientation workshops and study tour for the newly posted CHN to become CHOs | <b>Verify by observation / interview:</b>                                                                                                                                                                        |  |  |
|      |                                                                                        | Train all the CHNs before they are deployed into the CHPS zones                                                                                                                                                  |  |  |
|      |                                                                                        | Lists of trainings held available                                                                                                                                                                                |  |  |
|      |                                                                                        | Lists of participants who took part in the training                                                                                                                                                              |  |  |
|      |                                                                                        | Report on the training held                                                                                                                                                                                      |  |  |
| 43.2 | CHOs in the zones are provided with comfort items                                      | <b>Verify by observation / interview:</b>                                                                                                                                                                        |  |  |
|      |                                                                                        | Room furniture: living room set, dining room set                                                                                                                                                                 |  |  |
|      |                                                                                        | TV                                                                                                                                                                                                               |  |  |
|      |                                                                                        | Radio                                                                                                                                                                                                            |  |  |
|      |                                                                                        | Kitchen Ware: Sets of plates and cups; Sets of cooking ware; Set of cutlery                                                                                                                                      |  |  |
|      |                                                                                        | Refrigerator ( gas or electricity)                                                                                                                                                                               |  |  |



|      |                                                             |                                                                                      |  |  |
|------|-------------------------------------------------------------|--------------------------------------------------------------------------------------|--|--|
| 43.3 | CHOs in the zones are provided with logistics and equipment | Verify by observation / interview:                                                   |  |  |
|      |                                                             | Working gear ( Boot and Rain coat)                                                   |  |  |
|      |                                                             | Stethoscope                                                                          |  |  |
|      |                                                             | Consumables                                                                          |  |  |
|      |                                                             | Thermometer                                                                          |  |  |
|      |                                                             | Angiopoid Lamp                                                                       |  |  |
|      |                                                             | Weighing Scales: Bathroom and Salter Hanging Scale                                   |  |  |
|      |                                                             | Training Manuals & Dissemination                                                     |  |  |
|      |                                                             | IE& C materials                                                                      |  |  |
|      |                                                             | Cold boxes                                                                           |  |  |
|      |                                                             | Transport: motorbike, bicycle, boat                                                  |  |  |
|      |                                                             | Boat logistics (life jackets, torch, kerosene stove, mattress, camp bed, mega phone) |  |  |

**DHMT: Achievement of 15 Steps**

| 15 Steps |                                                                                                              | Name of CHPS: |                    | Name of CHPS: |                    | Name of CHPS: |                    |
|----------|--------------------------------------------------------------------------------------------------------------|---------------|--------------------|---------------|--------------------|---------------|--------------------|
|          |                                                                                                              | yes / no      | Details / comments | yes / no      | Details / comments | yes / no      | Details / comments |
| 1        | Plans for CHPS have been developed                                                                           |               |                    |               |                    |               |                    |
| 2        | Communities have been consulted and health workers sensitized                                                |               |                    |               |                    |               |                    |
| 3        | Health workers have had (a series of) dialogue sessions with community leadership                            |               |                    |               |                    |               |                    |
| 4        | Community information durbars have been held                                                                 |               |                    |               |                    |               |                    |
| 5        | CHOs have been selected and trained                                                                          |               |                    |               |                    |               |                    |
| 6        | Community Health Committee members have been selected and oriented a durbar has been held for their approval |               |                    |               |                    |               |                    |
| 7        | A Community Profile has been compiled                                                                        |               |                    |               |                    |               |                    |
| 8        | Community Health Compound has been constructed                                                               |               |                    |               |                    |               |                    |
| 9        | Logistics for placing the CHO in the community have been mobilized                                           |               |                    |               |                    |               |                    |
| 10       | A Durbar has been held to formally launch the CHO program                                                    |               |                    |               |                    |               |                    |
| 11       | Community Health Volunteers have been selected                                                               |               |                    |               |                    |               |                    |
| 12       | Durbar have been held for the approval of CHV                                                                |               |                    |               |                    |               |                    |
| 13       | The CHVs have been trained                                                                                   |               |                    |               |                    |               |                    |
| 14       | Logistics (Resources) have been mobilized for equipping of Community Health Volunteers                       |               |                    |               |                    |               |                    |
| 15       | A Durbar has been organized for approval of Community Health Volunteers                                      |               |                    |               |                    |               |                    |

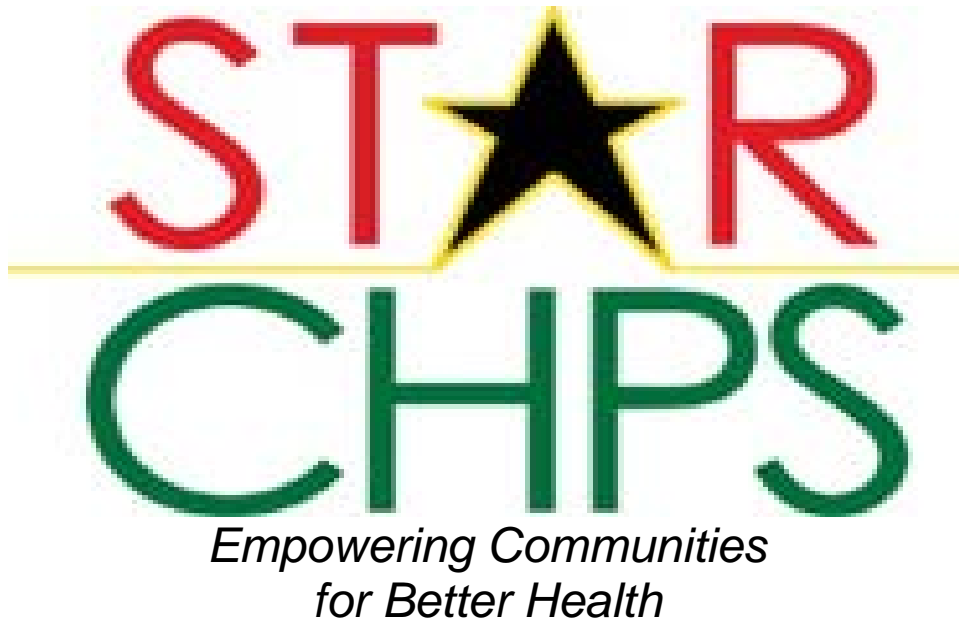

# STAR CHPS ASSESSMENT

## District Health Management Team Tool

Funded by:

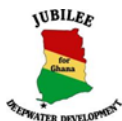

Implemented by:

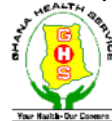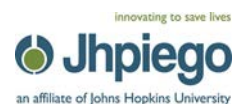

*STAR CHPS mission is to strengthen communities and boost superior performance and efficiency at CHPS Zones in the 6 coastal districts in the Western Region, thus increasing access to high quality primary healthcare to over a million residents.*

**Compendium of Performance Standards for Community Health Planning and Services (CHPS)**  
*(Draft updated 11/29/2013)*

| Categories and Thematic Areas                        | Total standards | Total standards achieved | % |
|------------------------------------------------------|-----------------|--------------------------|---|
| <b>1. Standards for Community Health Officer</b>     |                 |                          |   |
| <b>A. Basic Clinical Services</b>                    |                 |                          |   |
| <b>A1. Child Health</b>                              |                 |                          |   |
| 1. Immunization                                      | 5               |                          |   |
| 2. Nutrition, Breastfeeding and Growth Monitoring    | 8               |                          |   |
| 3. IMNCI – Children less than 2 months up to 5 years | 9               |                          |   |
| <b>A2. Reproductive Health</b>                       |                 |                          |   |
| 4. Family Planning                                   | 5               |                          |   |
| 5. HIV and STI                                       | 9               |                          |   |
| 6. Antenatal Care                                    | 10              |                          |   |
| 7. Safe Emergency Delivery and Newborn Resuscitation | 6               |                          |   |
| 8. Post-natal Care and Essential Newborn Care        | 4               |                          |   |
| <b>A3. Illnesses and Emergencies</b>                 |                 |                          |   |
| 9. Infection Prevention                              | 7               |                          |   |
| 10. Malaria                                          | 4               |                          |   |
| 11. TB                                               | 2               |                          |   |
| 12. Hypertension                                     | 2               |                          |   |
| 13. Diabetes                                         | 2               |                          |   |
| 14. Sickle cell                                      | 2               |                          |   |
| 15. Elephantiasis                                    | 2               |                          |   |
| 16. Mental Health                                    | 2               |                          |   |
| 17. Diarrhoea                                        | 2               |                          |   |
| 18. Intestinal Worms                                 | 2               |                          |   |
| 19. Acute Respiratory Tract Infections               | 2               |                          |   |
| 20. First Aid and Home Emergencies                   | 11              |                          |   |
| <b>1. Community Linkages and Outreach Services</b>   |                 |                          |   |
| 21. Health Promotion and Health Education            | 5               |                          |   |

|                                                                 |   |  |  |
|-----------------------------------------------------------------|---|--|--|
| 22. Disease Surveillance                                        | 4 |  |  |
| 23. Home Visits                                                 | 2 |  |  |
| 24. School Health                                               | 6 |  |  |
| 25. Outreach Activities                                         | 2 |  |  |
| 26. Supporting Community Health Volunteers                      | 1 |  |  |
| 27. Working with the Community Health Committee                 | 4 |  |  |
| <b>2. Management of Activities, Services and Logistics</b>      |   |  |  |
| 28. Planning, implementing and managing activities              | 2 |  |  |
| 29. Logistics Management                                        | 5 |  |  |
| 30. Financial Management                                        | 8 |  |  |
| 31. Data collection, reporting, analysis and use                | 5 |  |  |
| <b>32. Standards for Community Health Volunteers</b>            |   |  |  |
| 32. Disease prevention and environmental sanitation             | 1 |  |  |
| 33. Home visiting                                               | 4 |  |  |
| 34. Home management of minor ailments                           | 2 |  |  |
| 35. Community Outreaches                                        | 7 |  |  |
| 36. Equipment, logistics and supplies                           | 2 |  |  |
| <b>37. Standards for Community Health Committee</b>             |   |  |  |
| 37. Governance, membership and operation                        | 5 |  |  |
| 38. Selection and supervision of community volunteers           | 2 |  |  |
| 39. Welfare of CHO (include Security)                           | 2 |  |  |
| 40. Facility maintenance                                        | 2 |  |  |
| 41. Resource mobilization and management                        | 3 |  |  |
| <b>42. Standards for District Health Management Team (DHMT)</b> |   |  |  |
| 41. Management of CHPS Implementation                           | 9 |  |  |
| 42. Support to CHO                                              | 3 |  |  |
| 43. Equipment                                                   | 3 |  |  |

## Gaps

[illegible]

### ACTION PLAN

| Gap Identified | Action to be taken | Person(s) responsible | Support needed | When will action be completed |
|----------------|--------------------|-----------------------|----------------|-------------------------------|
|                |                    |                       |                |                               |
|                |                    |                       |                |                               |
|                |                    |                       |                |                               |
|                |                    |                       |                |                               |
|                |                    |                       |                |                               |

## Community Health Management Committee: 37) Governance 38) CHVs 39) CHO Welfare 40) Facility Care 41) Resource Mobilization

| 37   | Governance, membership and operation                                                            |                                                                                                                | Yes, No, N/A | Comments |
|------|-------------------------------------------------------------------------------------------------|----------------------------------------------------------------------------------------------------------------|--------------|----------|
| 37.1 | CHMC members recognize the importance of CHPS to the community                                  | <b>Verify by interview / observation:</b>                                                                      |              |          |
|      |                                                                                                 | Provides appropriate information to community members to enable them adopt healthy lifestyle.                  |              |          |
|      |                                                                                                 | Facilitate transportation of those who are sick and need further services                                      |              |          |
| 37.2 | Member(s) know and are able to state their responsibilities                                     | <b>Verify by interview / observation:</b>                                                                      |              |          |
|      |                                                                                                 | supervise health volunteers                                                                                    |              |          |
|      |                                                                                                 | liaise between the community and the health sector                                                             |              |          |
|      |                                                                                                 | ensure welfare of CHVs and the CHO                                                                             |              |          |
|      |                                                                                                 | speak for and ensure better health conditions within the community                                             |              |          |
|      |                                                                                                 | resolve conflict in the community when conflicts arise between the community members and those working on CHPS |              |          |
|      |                                                                                                 | mobilize the community members to obtain and maintain CHPS compound                                            |              |          |
|      |                                                                                                 | ensure security of the CHO                                                                                     |              |          |
|      |                                                                                                 | mobilize resources to support the CHPS program at the community level                                          |              |          |
|      |                                                                                                 | co-ordinates waste management at the CHPS compound                                                             |              |          |
|      |                                                                                                 | support health programs such as health education, disease surveillance and advocacy at the community level     |              |          |
|      |                                                                                                 | manage local finances at the level of the volunteers establishment                                             |              |          |
|      |                                                                                                 | facilitate arrangements for Emergency Transport Response Arrangements at the community level                   |              |          |
|      |                                                                                                 | members meet regularly                                                                                         |              |          |
| 37.3 | Minutes of meeting are recorded accurately with decisions and follow up actions carefully noted | <b>Verify by interview / observation:</b>                                                                      |              |          |
|      |                                                                                                 | Minutes of the CHMC meetings are Dated, Timed and signed                                                       |              |          |
|      |                                                                                                 | Attendance or participants list of the CHMC meetings is available                                              |              |          |
|      |                                                                                                 | CHMC meeting minutes document the Purpose and Agenda of the meeting                                            |              |          |
|      |                                                                                                 | CHMC meetings have developed Action Plans with clearly assigned responsibilities and timelines                 |              |          |
|      |                                                                                                 | CHMC minutes indicate the date of the next meeting                                                             |              |          |
| 37.4 | Health programs and activities are supported by committee                                       | <b>Verify by interview / observation:</b>                                                                      |              |          |
|      |                                                                                                 | Supports the CHO in effecting referrals by facilitating Emergency Response Transport Arrangements.             |              |          |
|      |                                                                                                 | Provides support to the CHO by identifying and designating a helper to clean the community health compound     |              |          |
|      |                                                                                                 | Encourages CHVs to trace defaulters                                                                            |              |          |
|      |                                                                                                 | Visits CHO during outreach activities (optional)                                                               |              |          |



|  |  |                                                                                         |  |  |
|--|--|-----------------------------------------------------------------------------------------|--|--|
|  |  | The committee members play the role of community key informants in disease surveillance |  |  |
|--|--|-----------------------------------------------------------------------------------------|--|--|

|      |                                                                                        |                                                                                                                                           |  |  |
|------|----------------------------------------------------------------------------------------|-------------------------------------------------------------------------------------------------------------------------------------------|--|--|
| 37.5 | Conflicts are resolved successfully                                                    | <b>Verify by interview / observation:</b>                                                                                                 |  |  |
|      |                                                                                        | CHMC members listens carefully to both sides of the issue and do not take rash decisions                                                  |  |  |
|      |                                                                                        | CHMC members make appointments to meet each side of disputing party to hear each side of the case objectively                             |  |  |
|      |                                                                                        | CHMC members are impartial in all cases                                                                                                   |  |  |
|      |                                                                                        | CHMC members document decisions and roles expected of them and all contesting parties                                                     |  |  |
| 38   | <b>Selection and supervision of community volunteers</b>                               |                                                                                                                                           |  |  |
| 38.1 | Administrative supervision of work of community volunteers is undertaken appropriately | <b>Verify by interview / observation:</b>                                                                                                 |  |  |
|      |                                                                                        | CHMC members coordinate and administer the operations of the Volunteers in support of the CHO (Keeps a work plan / Supervision schedules) |  |  |
|      |                                                                                        | Logistics and supply issues of the Volunteer are handled by the CHMC members                                                              |  |  |
|      |                                                                                        | Disputes, behavioral aberrations and conflicts with the Volunteers engagement are documented and resolved by the CHMC members             |  |  |
|      |                                                                                        | CHMC members document performance (administrative) of the CHVs                                                                            |  |  |
|      |                                                                                        | Keeps a work plan for supervision and monitoring of the community health volunteers                                                       |  |  |
| 38.2 | The committee provides appropriate motivation for volunteers                           | <b>Verify by interview / observation:</b>                                                                                                 |  |  |
|      |                                                                                        | Ensures that CHV is provided with working tools (Rain coat, Torch Light, Back-Pack, Bicycles, Condoms, Paracetamol, Foaming tablets etc.) |  |  |
|      |                                                                                        | CHMC members ensure that due recognition is given to hard working CHVs at durbars or festivals                                            |  |  |
|      |                                                                                        | Visits volunteers regularly                                                                                                               |  |  |
| 39   | <b>Welfare of CHO (include Security)</b>                                               |                                                                                                                                           |  |  |
| 39.1 | The committee cares for the welfare of the CHO                                         | <b>Verify by interview / observation:</b>                                                                                                 |  |  |
|      |                                                                                        | ensure that the CHO is comfortable (They facilitate the procurement of comfort items such as Mattress, radio and /or Television set)      |  |  |
|      |                                                                                        | CHMC members organize communal labor to plant wood lots for shade and to serve as wind breaks around the Community Health Compound        |  |  |
|      |                                                                                        | Facilitate the connection of the Community Health Compound to the National Electricity Grid or Solar Panel lighting                       |  |  |
|      |                                                                                        | Liaises with the Districts Assembly and other institutions to support the work of the CHO                                                 |  |  |
|      |                                                                                        | CHMC members organize communal labor to plant wood lots for shade and to serve as wind breaks around the Community Health Compound        |  |  |
| 39.2 | The security of the CHPS compound is managed appropriately                             | <b>Verify by interview / observation:</b>                                                                                                 |  |  |
|      |                                                                                        | All doors and windows at the CHPS are in good condition and under lock and key                                                            |  |  |
|      |                                                                                        | Provides 24-hour or night security at the CHPS                                                                                            |  |  |
| 40   | <b>Facility &amp; service maintenance</b>                                              |                                                                                                                                           |  |  |
| 40.1 | Waste created at the CHPS compound is managed appropriately                            | <b>Verify by interview / observation:</b>                                                                                                 |  |  |
|      |                                                                                        | Outside bins are available at the CHPS compound and are covered                                                                           |  |  |
|      |                                                                                        | Safety boxes are available and being used                                                                                                 |  |  |

|      |                                                                                           |                                                                                                          |  |  |
|------|-------------------------------------------------------------------------------------------|----------------------------------------------------------------------------------------------------------|--|--|
|      |                                                                                           | Waste disposal structures in place at the CHPS ( Ask and check how waste is disposed at compound)        |  |  |
| 40.2 | A Community ambulance system / emergency transportation system is created and maintained  | <b>Verify by interview / observation:</b>                                                                |  |  |
|      |                                                                                           | Type of transport system in place                                                                        |  |  |
|      |                                                                                           | Minutes of meetings held with Transport owners to discuss transport arrangements are available           |  |  |
|      |                                                                                           | List of emergency transport owners with names and contact numbers exist                                  |  |  |
|      |                                                                                           | pre-agreed payment methods for emergency transport (in writing, preferred)                               |  |  |
| 41   | <b>Resource mobilization and management</b>                                               |                                                                                                          |  |  |
| 41.1 | Records of contributors and contributions to the CHPS compound are kept                   | <b>Verify by interview / observation:</b>                                                                |  |  |
|      |                                                                                           | An updated logbook/register exists that documents all donations to support the community health compound |  |  |
|      |                                                                                           | Register on contributors/donations captures the following:                                               |  |  |
|      |                                                                                           | personal details of person making or receiving payment: name, age, sex, address                          |  |  |
|      |                                                                                           | What the person has contributed / received (if payment made)                                             |  |  |
| 41.2 | Accurate records are kept of contributions and payments made to support the CHPS compound | <b>Verify by interview / observation:</b>                                                                |  |  |
|      |                                                                                           | Date of contribution                                                                                     |  |  |
|      |                                                                                           | Sex of contributor                                                                                       |  |  |
|      |                                                                                           | Age of contributor                                                                                       |  |  |
|      |                                                                                           | Description of what was contributed                                                                      |  |  |
|      |                                                                                           | Signature of contributor                                                                                 |  |  |
| 41.3 | All financial transactions are recorded appropriately                                     | <b>Verify by interview / observation:</b>                                                                |  |  |
|      |                                                                                           | Date of transaction                                                                                      |  |  |
|      |                                                                                           | Description of transaction                                                                               |  |  |
|      |                                                                                           | Money in                                                                                                 |  |  |
|      |                                                                                           | Money out                                                                                                |  |  |
|      |                                                                                           | Balance                                                                                                  |  |  |
|      |                                                                                           | Signature of person doing the transaction                                                                |  |  |

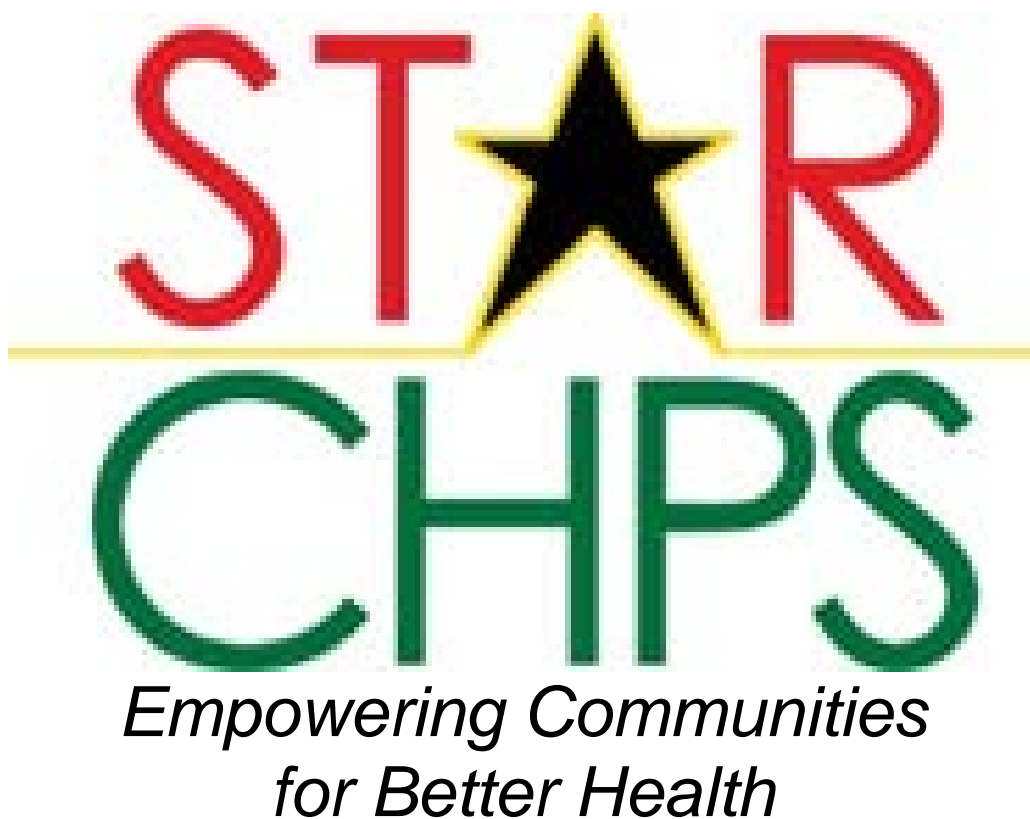

# STAR CHPS ASSESSMENT

## Community Health Volunteer Tool

Funded by:

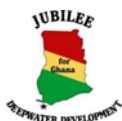

Implemented by:

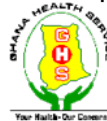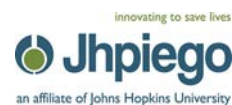

*STAR CHPS mission is to strengthen communities and boost superior performance and efficiency at CHPS Zones in the 6 coastal districts in the Western Region, thus increasing access to high quality primary healthcare to over a million residents.*

**District:** \_\_\_\_\_

**Compendium of Performance Standards for Community Health Planning and Services (CHPS)**  
*(Draft updated 11/29/2013)*

| Categories and Thematic Areas                        | Total standards | Total standards achieved | % |
|------------------------------------------------------|-----------------|--------------------------|---|
| <b>1. Standards for Community Health Officer</b>     |                 |                          |   |
| <b>A. Basic Clinical Services</b>                    |                 |                          |   |
| <b>A1. Child Health</b>                              |                 |                          |   |
| 1. Immunization                                      | 5               |                          |   |
| 2. Nutrition, Breastfeeding and Growth Monitoring    | 8               |                          |   |
| 3. IMNCI – Children less than 2 months up to 5 years | 9               |                          |   |
| <b>A2. Reproductive Health</b>                       |                 |                          |   |
| 4. Family Planning                                   | 5               |                          |   |
| 5. HIV and STI                                       | 9               |                          |   |
| 6. Antenatal Care                                    | 10              |                          |   |
| 7. Safe Emergency Delivery and Newborn Resuscitation | 6               |                          |   |
| 8. Post-natal Care and Essential Newborn Care        | 4               |                          |   |
| <b>A3. Illnesses and Emergencies</b>                 |                 |                          |   |
| 9. Infection Prevention                              | 7               |                          |   |
| 10. Malaria                                          | 4               |                          |   |
| 11. TB                                               | 2               |                          |   |
| 12. Hypertension                                     | 2               |                          |   |
| 13. Diabetes                                         | 2               |                          |   |
| 14. Sickle cell                                      | 2               |                          |   |
| 15. Elephantiasis                                    | 2               |                          |   |
| 16. Mental Health                                    | 2               |                          |   |
| 17. Diarrhoea                                        | 2               |                          |   |
| 18. Intestinal Worms                                 | 2               |                          |   |
| 19. Acute Respiratory Tract Infections               | 2               |                          |   |
| 20. First Aid and Home Emergencies                   | 11              |                          |   |
| <b>1. Community Linkages and Outreach Services</b>   |                 |                          |   |
| 21. Health Promotion and Health Education            | 5               |                          |   |

|                                                                 |   |  |  |
|-----------------------------------------------------------------|---|--|--|
| 22. Disease Surveillance                                        | 4 |  |  |
| 23. Home Visits                                                 | 2 |  |  |
| 24. School Health                                               | 6 |  |  |
| 25. Outreach Activities                                         | 2 |  |  |
| 26. Supporting Community Health Volunteers                      | 1 |  |  |
| 27. Working with the Community Health Committee                 | 4 |  |  |
| <b>2. Management of Activities, Services and Logistics</b>      |   |  |  |
| 28. Planning, implementing and managing activities              | 2 |  |  |
| 29. Logistics Management                                        | 5 |  |  |
| 30. Financial Management                                        | 8 |  |  |
| 31. Data collection, reporting, analysis and use                | 5 |  |  |
| <b>32. Standards for Community Health Volunteers</b>            |   |  |  |
| 32. Disease prevention and environmental sanitation             | 1 |  |  |
| 33. Home visiting                                               | 4 |  |  |
| 34. Home management of minor ailments                           | 2 |  |  |
| 35. Community Outreaches                                        | 7 |  |  |
| 36. Equipment, logistics and supplies                           | 2 |  |  |
| <b>37. Standards for Community Health Committee</b>             |   |  |  |
| 37. Governance, membership and operation                        | 5 |  |  |
| 38. Selection and supervision of community volunteers           | 2 |  |  |
| 39. Welfare of CHO (include Security)                           | 2 |  |  |
| 40. Facility maintenance                                        | 2 |  |  |
| 41. Resource mobilization and management                        | 3 |  |  |
| <b>42. Standards for District Health Management Team (DHMT)</b> |   |  |  |
| 41. Management of CHPS Implementation                           | 9 |  |  |
| 42. Support to CHO                                              | 3 |  |  |
| 43. Equipment                                                   | 3 |  |  |

## Gaps

[illegible]

### ACTION PLAN

| Gap Identified | Action to be taken | Person(s) responsible | Support needed | When will action be completed |
|----------------|--------------------|-----------------------|----------------|-------------------------------|
|                |                    |                       |                |                               |
|                |                    |                       |                |                               |
|                |                    |                       |                |                               |
|                |                    |                       |                |                               |
|                |                    |                       |                |                               |



**Community Health Volunteer:** 32) Disease prevention and Environmental Sanitation 33) Home Visiting  
34) Home Management 35) Community Outreach 36) Logistics

| 32   | Disease Prevention and Environmental Sanitation                                                |                                                                                                                                                                                        | Yes, No, N/A | Comments |
|------|------------------------------------------------------------------------------------------------|----------------------------------------------------------------------------------------------------------------------------------------------------------------------------------------|--------------|----------|
| 32.1 | CHV conducts community observation (i.e. walk around) and situation analysis with CHO and CHMC | Verify by observation / interview:                                                                                                                                                     |              |          |
|      |                                                                                                | Makes plan for a community walk around                                                                                                                                                 |              |          |
|      |                                                                                                | Informs community leaders about the purpose of the intended walk about                                                                                                                 |              |          |
|      |                                                                                                | Captures findings from field visits in field note book                                                                                                                                 |              |          |
|      |                                                                                                | Sketches Community map to indicate areas that need health action                                                                                                                       |              |          |
|      |                                                                                                | Engages with community people (one-on-one discussion/ group discussions/in durbars) to find out their views on health concerns in the community                                        |              |          |
|      |                                                                                                | Maps out community water source, refuse dump, markets, kind of toilet facilities, drainage system, environmental risk areas for mosquitos to breed                                     |              |          |
|      |                                                                                                | Disseminates findings                                                                                                                                                                  |              |          |
|      |                                                                                                | Name of CHV in minutes from planning meeting                                                                                                                                           |              |          |
| 33   | Home visiting                                                                                  |                                                                                                                                                                                        |              |          |
| 33.1 | Preparation is made for conducting home visits                                                 | Verify by observation / interview:                                                                                                                                                     |              |          |
|      |                                                                                                | CHV plans with CHO for visits to be conducted during the month                                                                                                                         |              |          |
|      |                                                                                                | CHV prepares home visiting bag                                                                                                                                                         |              |          |
| 33.2 | Home is entered appropriately                                                                  | Verify by observation / interview:                                                                                                                                                     |              |          |
|      |                                                                                                | Declares his or her presence by knocking or a locally appropriate greeting to signal his presence                                                                                      |              |          |
|      |                                                                                                | CHV waits for response                                                                                                                                                                 |              |          |
|      |                                                                                                | Enters home and greets household members                                                                                                                                               |              |          |
|      |                                                                                                | Asks for head of household or family                                                                                                                                                   |              |          |
|      |                                                                                                | Establishes rapport, introduces himself and purpose of visit                                                                                                                           |              |          |
|      |                                                                                                | Seeks permission to carry out purpose                                                                                                                                                  |              |          |
| 33.3 | Conducts a household needs assessment                                                          | Verify by observation / interview:                                                                                                                                                     |              |          |
|      |                                                                                                | Identifies household members and verifies and notes individual status and wellbeing (presence / absence / well-being; for women in child-bearing age, pregnancy status/lactating etc.) |              |          |
|      |                                                                                                | Identify family members with special needs e.g. mentally handicapped, acutely ill                                                                                                      |              |          |
|      |                                                                                                | Checks for house hold membership and updates in community register if necessary                                                                                                        |              |          |

|      |                                                                              |                                                                                                                                                                                                                                                          |  |  |
|------|------------------------------------------------------------------------------|----------------------------------------------------------------------------------------------------------------------------------------------------------------------------------------------------------------------------------------------------------|--|--|
|      |                                                                              | Asks if anyone in the home sleeps under ITNs                                                                                                                                                                                                             |  |  |
|      |                                                                              | Refers cases beyond his/her ability to CHO or Health Facility according to protocol (Examine his referral booklet)                                                                                                                                       |  |  |
| 33.4 | Ends visit by exiting home appropriately                                     | <b>Verify by observation / interview:</b>                                                                                                                                                                                                                |  |  |
|      |                                                                              | Reminds members of households/family on issues discussed and other issues of concern to the family                                                                                                                                                       |  |  |
|      |                                                                              | Asks clients to summarize what has been discussed to ascertain their understanding                                                                                                                                                                       |  |  |
|      |                                                                              | asks for any outstanding concerns and respond appropriately                                                                                                                                                                                              |  |  |
|      |                                                                              | Plans next visit with hosts                                                                                                                                                                                                                              |  |  |
|      |                                                                              | Thanks host/family for their time                                                                                                                                                                                                                        |  |  |
| 34   | Home management of minor ailments                                            |                                                                                                                                                                                                                                                          |  |  |
| 34.1 | Children with fever are identified and managed appropriately within the home | <b>Verify by observation / interview:</b>                                                                                                                                                                                                                |  |  |
|      |                                                                              | Assesses if child has fever/is hot by placing the back of his or her hand over the child's forehead (if the body temperature of child is higher than that of the CHV/if the child feels hot to touch, there is an indication that the child has fever)   |  |  |
|      |                                                                              | reduces fever by tepid sponging AND / OR a wet towel under armpits and on forehead Soaks a towel in water and gently wipes child from the feet towards head                                                                                              |  |  |
|      |                                                                              | Gives child paracetamol syrup after sponging as follows: 0-6months give 2.5 mls; 6months-1year give 5mls; 1 year-2 years give 7.5mls; 2years to 5years give 10mls; 6year to 12 year give 1 tablet (500mg); 12 years and above give adult dose – (1000mg) |  |  |
|      |                                                                              | Ensures client has eaten (fluid and sugar)                                                                                                                                                                                                               |  |  |
|      |                                                                              | ACT is given according to weight in divided doses (morning & evening) for three consecutive days                                                                                                                                                         |  |  |
|      |                                                                              | gives first dose to children in his/her presence                                                                                                                                                                                                         |  |  |
| 34.2 | Diarrhea is identified and managed                                           | <b>Verify by observation / interview:</b>                                                                                                                                                                                                                |  |  |

|      |                                                       |                                                                                                                                                                                                                                                              |  |  |
|------|-------------------------------------------------------|--------------------------------------------------------------------------------------------------------------------------------------------------------------------------------------------------------------------------------------------------------------|--|--|
|      | correctly                                             | Asks client or care giver when diarrhea started and how often stools are passed                                                                                                                                                                              |  |  |
|      |                                                       | Ask client if stool contains blood                                                                                                                                                                                                                           |  |  |
|      |                                                       | Determines the level of dehydration in the child: feeling and testing for the elasticity of the skin, level of sunkeness of eye socket, level of dryness of the tongue                                                                                       |  |  |
|      |                                                       | teach mother / caregiver how to mix and administer ORS (note: expiry date, clean water, correct amount of water for sachet), cautioning that a new solution should be mixed after 24 hour period                                                             |  |  |
|      |                                                       | show mother how to administer Zinc and continue for 10 days (infants: dissolve tablet in small amount of breastmilk; children: dissolve in small amount of clean water or can be chewed) Zinc tablet dosage: 10 mg for 6mths-11mths and 20mg for 12mths-5yrs |  |  |
|      |                                                       | advises client to give ORS after child has loose stools or vomits                                                                                                                                                                                            |  |  |
|      |                                                       | Counsels breastfed child to be breastfed frequently                                                                                                                                                                                                          |  |  |
|      |                                                       | Refer if necessary                                                                                                                                                                                                                                           |  |  |
| 35   | <b>Community Outreach</b>                             |                                                                                                                                                                                                                                                              |  |  |
| 35.1 | CHV participates in outreach activities               | <b>Verify by observation / interview:</b>                                                                                                                                                                                                                    |  |  |
|      |                                                       | Informs community of date and venue of planned outreach visit                                                                                                                                                                                                |  |  |
|      |                                                       | Announces the presence of the CHO/outreach team in the community                                                                                                                                                                                             |  |  |
|      |                                                       | Assists with preparation of the venue                                                                                                                                                                                                                        |  |  |
|      |                                                       | CHV attends outreach activities arranged by CHO                                                                                                                                                                                                              |  |  |
|      |                                                       | assists CHOs e.g. health education, weighing children, recording data                                                                                                                                                                                        |  |  |
| 35.2 | The community is mobilized for health education       | <b>Verify by observation / interview:</b>                                                                                                                                                                                                                    |  |  |
|      |                                                       | plans activities, suitable date and time for program with CHMC                                                                                                                                                                                               |  |  |
|      |                                                       | Identifies target groups/ social groups and topics to be discussed with them                                                                                                                                                                                 |  |  |
| 35.3 | Facilitates health education session in the community | <b>Verify by observation / interview:</b>                                                                                                                                                                                                                    |  |  |
|      |                                                       | Welcomes community people to gathering                                                                                                                                                                                                                       |  |  |
|      |                                                       | introduces the program and / or presenter                                                                                                                                                                                                                    |  |  |
|      |                                                       | facilitates discussion and questions                                                                                                                                                                                                                         |  |  |
| 35.4 | Health education is provided to promote breastfeeding | <b>Verify by observation / interview:</b>                                                                                                                                                                                                                    |  |  |
|      |                                                       | Breast milk is the natural food for the baby                                                                                                                                                                                                                 |  |  |
|      |                                                       | Breast milk is clean because it is not contaminated by dirty hands or any other materials.                                                                                                                                                                   |  |  |
|      |                                                       | Breast milk protects the baby from infection                                                                                                                                                                                                                 |  |  |

|      |                                                                                                                |                                                                                                                                                                                                       |  |  |
|------|----------------------------------------------------------------------------------------------------------------|-------------------------------------------------------------------------------------------------------------------------------------------------------------------------------------------------------|--|--|
|      |                                                                                                                | Breast milk is always available and requires no preparation                                                                                                                                           |  |  |
|      |                                                                                                                | Provides information that breast milk provides all the necessary nutrients for the baby to grow and develop well                                                                                      |  |  |
|      |                                                                                                                | Provides information that breast milk also establishes a special relationship between mother and the baby                                                                                             |  |  |
|      |                                                                                                                | exclusive breastfeeding can be used as a family planning method for the first 6 months (LAM)                                                                                                          |  |  |
| 35.5 | Information is provided on the various family planning methods that are available (individual or group)        | <b>Verify by observation / interview:</b>                                                                                                                                                             |  |  |
|      |                                                                                                                | <b>Barrier methods:</b> Condoms for male and females, Spermicides or foaming tablets,                                                                                                                 |  |  |
|      |                                                                                                                | <b>Short term (Short-acting) methods:</b> oral contraceptive pills (combined and mini pill), injectable (Depo Provera, Norigynon-3monthly), Lactation Amenorrhea Method (LAM) and Natural FP methods. |  |  |
|      |                                                                                                                | <b>Long term ( Long –Acting reversible) methods:</b> either intra uterine device or implants; Jadelle                                                                                                 |  |  |
|      |                                                                                                                | <b>Permanent / irreversible methods:</b> which include Tubal Ligation( female sterilization) or Vasectomy (male sterilization)                                                                        |  |  |
| 35.6 | Benefits of family planning are discussed with an individual, couple or group                                  | <b>Verify by observation / interview:</b>                                                                                                                                                             |  |  |
|      |                                                                                                                | Provides information that FP enables the mother to remain healthy and strong                                                                                                                          |  |  |
|      |                                                                                                                | Provides information that FP helps children grow healthy and strong                                                                                                                                   |  |  |
|      |                                                                                                                | Provides information that FP enables parents to feed and take good care of their children.                                                                                                            |  |  |
|      |                                                                                                                | Provides information that FP helps prevent STIs (condoms)                                                                                                                                             |  |  |
|      |                                                                                                                | Provides information that the use of FP helps avoid unwanted pregnancies                                                                                                                              |  |  |
| 35.7 | Demonstration and education on condoms using a model and condom is provided for an individual, couple or group | <b>Verify by observation / interview:</b>                                                                                                                                                             |  |  |
|      |                                                                                                                | Ensures that condoms are not expired and not damaged and are safe to use                                                                                                                              |  |  |
|      |                                                                                                                | Tears open                                                                                                                                                                                            |  |  |
|      |                                                                                                                | Holds the tip of the condom squeeze out the air                                                                                                                                                       |  |  |
|      |                                                                                                                | Places the condom on the dummy penis and to rolls down                                                                                                                                                |  |  |
|      |                                                                                                                | Leaves space at the tip of the condom to collect semen during ejaculation                                                                                                                             |  |  |
|      |                                                                                                                | Advises that penis is fully withdrawn out of vagina soon after sex                                                                                                                                    |  |  |
|      |                                                                                                                | Removes and ties condom up, wrap for disposal                                                                                                                                                         |  |  |

|      |                            |                                                                                                  |  |  |
|------|----------------------------|--------------------------------------------------------------------------------------------------|--|--|
|      |                            | Advises on proper disposal of used condoms                                                       |  |  |
| 36   | Logistics                  |                                                                                                  |  |  |
| 36.1 | Equipment                  | <b>Verify by inspection:</b>                                                                     |  |  |
|      |                            | Community register                                                                               |  |  |
|      |                            | Back Pack (bag)                                                                                  |  |  |
|      |                            | Wellington boots                                                                                 |  |  |
|      |                            | Identity t-shirts                                                                                |  |  |
|      |                            | Malaria flipchart                                                                                |  |  |
|      |                            | health education materials (i.e. Posters )                                                       |  |  |
|      |                            | Condom model                                                                                     |  |  |
|      |                            | Raincoat                                                                                         |  |  |
|      |                            | Thermometer (digital)                                                                            |  |  |
|      |                            | Torch light with batteries                                                                       |  |  |
| 36.2 | Home visiting bag supplies | <b>Verify by inspection CHV has adequate quantities of the following for at least one month:</b> |  |  |
|      |                            | ORS                                                                                              |  |  |
|      |                            | Zinc tablets - at least 1 dose / 14 tablets                                                      |  |  |
|      |                            | Adults ACTs (AA, AL) - at least 1 dose                                                           |  |  |
|      |                            | Paediatric ACTs (AA, AL) - at least 1 dose                                                       |  |  |
|      |                            | Paracetamol Tablets and Syrup/suppository                                                        |  |  |
|      |                            | Condoms                                                                                          |  |  |
|      |                            | Alcohol rub                                                                                      |  |  |
|      |                            | Cotton bandage                                                                                   |  |  |
|      |                            | Cotton wool swabs                                                                                |  |  |
|      |                            | Crepe bandage                                                                                    |  |  |
|      |                            | Disposable gloves                                                                                |  |  |
|      |                            | Gauze swabs                                                                                      |  |  |
|      |                            | Gentian violet lotion                                                                            |  |  |
|      |                            | Hand Sanitizer                                                                                   |  |  |
|      |                            | Hand towels                                                                                      |  |  |
|      |                            | Insecticide Treated Nets (ITNs)                                                                  |  |  |
|      |                            | Liquid soap                                                                                      |  |  |
|      |                            | Measuring cup                                                                                    |  |  |
|      |                            | Methylated spirit                                                                                |  |  |
|      |                            | Pen                                                                                              |  |  |
|      |                            | Pencil                                                                                           |  |  |
|      |                            | Plaster                                                                                          |  |  |
|      |                            | Plastic apron                                                                                    |  |  |
|      |                            | Plastic file                                                                                     |  |  |

|  |  |                 |  |  |
|--|--|-----------------|--|--|
|  |  | Plastic galipot |  |  |
|  |  | Plastic Sheet   |  |  |
|  |  | Scissors        |  |  |
|  |  | Small note book |  |  |
|  |  | Spoon           |  |  |



# STAR CHPS ASSESSMENT

## Community Health Officer Tool1

Funded by:



Implemented by:



*STAR CHPS mission is to strengthen communities and boost superior performance and efficiency at CHPS Zones in the 6 coastal districts in the Western Region, thus increasing access to high quality primary healthcare to over a million residents.*

**District:** \_\_\_\_\_

**Compendium of Performance Standards for Community Health Planning and Services (CHPS)**  
*(Draft updated 11/29/2013)*

| Categories and Thematic Areas                        | Total standards | Total standards achieved | % |
|------------------------------------------------------|-----------------|--------------------------|---|
| <b>1. Standards for Community Health Officer</b>     |                 |                          |   |
| <b>A. Basic Clinical Services</b>                    |                 |                          |   |
| <b>A1. Child Health</b>                              |                 |                          |   |
| 1. Immunization                                      | 5               |                          |   |
| 2. Nutrition, Breastfeeding and Growth Monitoring    | 8               |                          |   |
| 3. IMNCI – Children less than 2 months up to 5 years | 9               |                          |   |
| <b>A2. Reproductive Health</b>                       |                 |                          |   |
| 4. Family Planning                                   | 5               |                          |   |
| 5. HIV and STI                                       | 9               |                          |   |
| 6. Antenatal Care                                    | 10              |                          |   |
| 7. Safe Emergency Delivery and Newborn Resuscitation | 6               |                          |   |
| 8. Post-natal Care and Essential Newborn Care        | 4               |                          |   |
| <b>A3. Illnesses and Emergencies</b>                 |                 |                          |   |
| 9. Infection Prevention                              | 7               |                          |   |
| 10. Malaria                                          | 4               |                          |   |
| 11. TB                                               | 2               |                          |   |
| 12. Hypertension                                     | 2               |                          |   |
| 13. Diabetes                                         | 2               |                          |   |
| 14. Sickle cell                                      | 2               |                          |   |
| 15. Elephantiasis                                    | 2               |                          |   |
| 16. Mental Health                                    | 2               |                          |   |
| 17. Diarrhoea                                        | 2               |                          |   |
| 18. Intestinal Worms                                 | 2               |                          |   |
| 19. Acute Respiratory Tract Infections               | 2               |                          |   |
| 20. First Aid and Home Emergencies                   | 11              |                          |   |
| <b>1. Community Linkages and Outreach Services</b>   |                 |                          |   |
| 21. Health Promotion and Health Education            | 5               |                          |   |



|                                                                 |   |  |  |
|-----------------------------------------------------------------|---|--|--|
| 22. Disease Surveillance                                        | 4 |  |  |
| 23. Home Visits                                                 | 2 |  |  |
| 24. School Health                                               | 6 |  |  |
| 25. Outreach Activities                                         | 2 |  |  |
| 26. Supporting Community Health Volunteers                      | 1 |  |  |
| 27. Working with the Community Health Committee                 | 4 |  |  |
| <b>2. Management of Activities, Services and Logistics</b>      |   |  |  |
| 28. Planning, implementing and managing activities              | 2 |  |  |
| 29. Logistics Management                                        | 5 |  |  |
| 30. Financial Management                                        | 8 |  |  |
| 31. Data collection, reporting, analysis and use                | 5 |  |  |
| <b>32. Standards for Community Health Volunteers</b>            |   |  |  |
| 32. Disease prevention and environmental sanitation             | 1 |  |  |
| 33. Home visiting                                               | 4 |  |  |
| 34. Home management of minor ailments                           | 2 |  |  |
| 35. Community Outreaches                                        | 7 |  |  |
| 36. Equipment, logistics and supplies                           | 2 |  |  |
| <b>37. Standards for Community Health Committee</b>             |   |  |  |
| 37. Governance, membership and operation                        | 5 |  |  |
| 38. Selection and supervision of community volunteers           | 2 |  |  |
| 39. Welfare of CHO (include Security)                           | 2 |  |  |
| 40. Facility maintenance                                        | 2 |  |  |
| 41. Resource mobilization and management                        | 3 |  |  |
| <b>42. Standards for District Health Management Team (DHMT)</b> |   |  |  |
| 41. Management of CHPS Implementation                           | 9 |  |  |
| 42. Support to CHO                                              | 3 |  |  |
| 43. Equipment                                                   | 3 |  |  |

## Gaps

[illegible]

### ACTION PLAN

| Gap Identified | Action to be taken | Person(s) responsible | Support needed | When will action be completed |
|----------------|--------------------|-----------------------|----------------|-------------------------------|
|                |                    |                       |                |                               |
|                |                    |                       |                |                               |
|                |                    |                       |                |                               |
|                |                    |                       |                |                               |
|                |                    |                       |                |                               |

## Child Health: 1) Immunization, 2) Nutrition and 3) IMNCI

| 1   | Immunization                                                                                        |                                                                                                                                                                                                                                                                                                                                                                                                                                                                  | Yes, No | Comments |
|-----|-----------------------------------------------------------------------------------------------------|------------------------------------------------------------------------------------------------------------------------------------------------------------------------------------------------------------------------------------------------------------------------------------------------------------------------------------------------------------------------------------------------------------------------------------------------------------------|---------|----------|
| 1.1 | Mothers / Caretakers bringing children for immunizations receive accurate information and education | <b>Verify by interviewing/observing</b><br>Checks immunization record and determines which vaccination should be given<br>Provides reasons for the vaccination<br>Emphasizes the importance of having ALL the appropriate cycles of vaccinations<br>Clarifies when to come in for the next immunization sessions<br>Discusses possible side effects and how to manage (e.g. pain, fever, etc.)<br>Answers any questions and checks understanding / comprehension |         |          |
| 1.2 | Monthly coverage of immunization is displayed graphically in the CHPS                               | <b>Verify by interviewing/observing</b><br>Has prepared the monthly coverage of immunization in a graphical form<br>Has displayed the graphs on the board in the CHPS compound.<br>Graphs displayed include information from at least 12 months previous                                                                                                                                                                                                         |         |          |
| 1.3 | Vaccines are stored properly                                                                        | <b>Verify by interviewing/observing the following:</b><br>Vaccines are properly stored inside the refrigerator<br>The refrigerator temperature sheet is available and kept up to date with recording twice a day<br>Vaccines are maintained with expiry date, batch numbers, stock levels<br>Vaccine ledger is maintained with stock level                                                                                                                       |         |          |
| 1.4 | The provider properly prepares for vaccine administration:                                          | <b>Verify by interviewing / observing:</b><br>Washes hands with soap and water and dries them, or uses alcohol hand rub<br>Explains to the mother or caretaker how to hold the child<br>Explains to the mother or caretaker which vaccination the child will receive<br>Checks for correct vaccine<br>Checks for right dose<br>Checks the expiration date on the vaccine                                                                                         |         |          |
| 1.5 | Immunizations are administered correctly                                                            | <b>Verify by interviewing / observing:</b><br>Correctly administers oral vaccination to the baby/child, ensuring the baby has swallowed all<br>For injectable vaccination: correctly draws up correct solution from correct vial<br>Wipes the injection site with clean water (if needed)                                                                                                                                                                        |         |          |

|            |                                                                                                               |                                                                                                                                                                                                                                                                                                                                                              |  |  |
|------------|---------------------------------------------------------------------------------------------------------------|--------------------------------------------------------------------------------------------------------------------------------------------------------------------------------------------------------------------------------------------------------------------------------------------------------------------------------------------------------------|--|--|
|            |                                                                                                               | Pinches up the anterior thigh (babies) or deltoid muscle (children) to inject, and inserts the needle/syringe                                                                                                                                                                                                                                                |  |  |
|            |                                                                                                               | Injects the medication and withdraws the needle quickly                                                                                                                                                                                                                                                                                                      |  |  |
|            |                                                                                                               | Discards the needle and syringe together in appropriate container (never recaps the needle)                                                                                                                                                                                                                                                                  |  |  |
|            |                                                                                                               | Washes hands with soap and water and dries them, or uses alcohol hand rub                                                                                                                                                                                                                                                                                    |  |  |
|            |                                                                                                               | Records the information on the appropriate forms and the vaccination card                                                                                                                                                                                                                                                                                    |  |  |
|            |                                                                                                               | Thanks the mother and the child                                                                                                                                                                                                                                                                                                                              |  |  |
| <b>2</b>   | <b>Breastfeeding, Growth Monitoring, and Nutrition</b>                                                        |                                                                                                                                                                                                                                                                                                                                                              |  |  |
| <b>2.1</b> | <b>CHO/midwife educates communities (community, group, couple) or the individual client on infant feeding</b> | <b>Verify that the CHO / midwife is able to :</b>                                                                                                                                                                                                                                                                                                            |  |  |
|            |                                                                                                               | <b>Give four advantages</b> of exclusive breast feeding for the infants first six months of life: 1. gives natural immunity; 2. is easily and efficiently digested; 3. prevents pregnancy by delaying menstrual cycle (LAM); 4. safe and costs less; 5. helps bonding between baby and mother; 6. prevents breast infection; 7. promotes development of baby |  |  |
|            |                                                                                                               | <b>Give three disadvantages</b> of formula / substitution feeding: 1. increases incidence of diarrhea; 2. increases chance of Respiratory Tract Infections due to low immunity; 3. is expensive; 4. may cause milk allergy/intolerance; 5. interferes with bonding; 6. pre-disposes the mother to early return of menstrual cycle/fertility                  |  |  |
|            |                                                                                                               | Counsels the mother on how to correctly position the baby for breastfeeding, encouraging the mother sit upright in a comfortable position while keeping the baby's head and body in a straight line (supporting the spine)                                                                                                                                   |  |  |
|            |                                                                                                               | Ensures the baby is facing the breast with the baby's nose is opposite her nipple                                                                                                                                                                                                                                                                            |  |  |
|            |                                                                                                               | Mother is to hold the breast with her hand – four fingers under the breast and the thumb positioned on top of the breast near the areola and use this to guide the nipple towards the baby                                                                                                                                                                   |  |  |
|            |                                                                                                               | Supports the mother to attach the baby to the breast - touching the baby's lips with her nipple, waiting until the baby opens the mouth wide and then moving the baby quickly to the breast                                                                                                                                                                  |  |  |
|            |                                                                                                               | Ensure the baby is properly fixed with the areola visible above the baby's upper lip, lower lip turned outwards, and baby's chin touching the breast                                                                                                                                                                                                         |  |  |
| <b>2.2</b> | <b>Education is provided on how to express breast milk</b>                                                    | <b>Verify that the CHO/midwife educates the mother on the steps for expressing breast milk:</b>                                                                                                                                                                                                                                                              |  |  |
|            |                                                                                                               | Wash hands thoroughly                                                                                                                                                                                                                                                                                                                                        |  |  |
|            |                                                                                                               | Sit or stand comfortably and hold a clean container with a fitted lid underneath the breast                                                                                                                                                                                                                                                                  |  |  |
|            |                                                                                                               | Put first finger and thumb on either side of the areola, behind the nipple                                                                                                                                                                                                                                                                                   |  |  |

|     |                                                                                                      |                                                                                                                                                                                                                                                                                                 |  |  |
|-----|------------------------------------------------------------------------------------------------------|-------------------------------------------------------------------------------------------------------------------------------------------------------------------------------------------------------------------------------------------------------------------------------------------------|--|--|
|     |                                                                                                      | Press slightly inward toward the breast between the finger and thumb, expressing milk, until the milk flow becomes slow                                                                                                                                                                         |  |  |
|     |                                                                                                      | Repeat the same with the other breast, alternating breasts for 20 to 30 minutes                                                                                                                                                                                                                 |  |  |
|     |                                                                                                      | Stored expressed milk in the container with a well fitting lid or cover                                                                                                                                                                                                                         |  |  |
| 2.3 | CHO / Midwife identifies and manages conditions of the breast which may interfere with breastfeeding | <b>Verify that the CHO / Midwife is able to:</b>                                                                                                                                                                                                                                                |  |  |
|     |                                                                                                      | Correctly <b>identify four common conditions</b> which may interfere with breastfeeding: inverted nipples, sore and cracked nipples, breast engorgement, mastitis (inflammation of breast), and breast abscess                                                                                  |  |  |
|     |                                                                                                      | Correctly counsels women with inverted nipples: to ensure the baby attaches to areola not the nipple & advise on using a syringe to assist with getting nipples to protrude before feeding                                                                                                      |  |  |
|     |                                                                                                      | Correctly counsels women with sore and cracked nipples to expose nipple to air, continue breast feeding on the least affected breast, ensure correct attachment, and/or apply Gentian Violet paint, 0.5 % if candidiasis                                                                        |  |  |
|     |                                                                                                      | Correctly counsels women with breast engorgement to apply warm compresses, to continue breast feeding , and to extract milk                                                                                                                                                                     |  |  |
|     |                                                                                                      | Correctly counsels women with mastitis to apply warm compresses, provide medication for pain relief and refer                                                                                                                                                                                   |  |  |
|     |                                                                                                      | Indicates that women with breast abscess should be referred                                                                                                                                                                                                                                     |  |  |
|     |                                                                                                      | <b>Provides three examples</b> of how the mother can prevent common breast conditions: give 1st breast milk soon after delivery, use various positions for breast feeding, attach baby correctly to breast, breastfeed on demand, empty one breast at a time, and do not use artificial nipples |  |  |
| 2.4 | Health education is provided on the importance of growth monitoring                                  | <b>Verify that the CHO / midwife demonstrates knowledge regarding why growth monitoring is essential:</b>                                                                                                                                                                                       |  |  |
|     |                                                                                                      | It helps in knowing the nutritional status and the general health of the child                                                                                                                                                                                                                  |  |  |
|     |                                                                                                      | It helps in early detection of growth failures and early correction                                                                                                                                                                                                                             |  |  |
|     |                                                                                                      | It is a forum to educate mother on the importance of good feeding, immunization and other issues related to the health of a child                                                                                                                                                               |  |  |
| 2.5 | Children and babies are weighed correctly                                                            | <b>Verify by observing / interviewing that the CHO / midwife correctly weighs the child:</b>                                                                                                                                                                                                    |  |  |
|     |                                                                                                      | Hang up the scale securely at a height and the face of the scale at the eye level of the nurse                                                                                                                                                                                                  |  |  |
|     |                                                                                                      | Check scale to see if the arrow is on zero (with weighing pant if applicable)                                                                                                                                                                                                                   |  |  |

|     |                                                                                               |                                                                                                                                                                                                                                                                                         |  |  |
|-----|-----------------------------------------------------------------------------------------------|-----------------------------------------------------------------------------------------------------------------------------------------------------------------------------------------------------------------------------------------------------------------------------------------|--|--|
|     |                                                                                               | Ask mother to remove all clothing on the infant or child                                                                                                                                                                                                                                |  |  |
|     |                                                                                               | If weighing a child assist the mother to put the child in the weighing pant, put the loop of the pant over the hook of the scale, and make sure the child's feet are hanging without touching anything <b>OR</b> if weighing an infant, place the baby in the scale with legs stretched |  |  |
|     |                                                                                               | Read the weight of the child on the scale when the child is calm                                                                                                                                                                                                                        |  |  |
|     |                                                                                               | Write down the weight in kilograms with figures to the hundred gram (e.g. 5.225 kg)                                                                                                                                                                                                     |  |  |
| 2.6 | CHO correctly records on the growth monitoring card and the relevant trend is noted           | <b>Verify by interviewing / observing:</b>                                                                                                                                                                                                                                              |  |  |
|     |                                                                                               | Records month and year of visit                                                                                                                                                                                                                                                         |  |  |
|     |                                                                                               | Beginning with the month of birth write out the following month of the year in the following box                                                                                                                                                                                        |  |  |
|     |                                                                                               | Record the weight of the child by plotting dot on the line corresponding to the weight in kilogram                                                                                                                                                                                      |  |  |
|     |                                                                                               | Join the dot to the previous month to obtain the growth curve                                                                                                                                                                                                                           |  |  |
|     |                                                                                               | Upward direction curve = Good; child growing well                                                                                                                                                                                                                                       |  |  |
|     |                                                                                               | Horizontal direction = Alert; not gaining weight                                                                                                                                                                                                                                        |  |  |
|     |                                                                                               | Downward direction = Alarm; losing weight – take immediate action                                                                                                                                                                                                                       |  |  |
| 2.7 | CHO / midwife identifies malnourished children                                                | <b>Verify that the CHO / midwife is able to :</b>                                                                                                                                                                                                                                       |  |  |
|     |                                                                                               | <b>Provide at least two signs / symptoms</b> of Marasmus in children: looks like an “old man”, is always hungry, has little muscle or fat and is very thin, and bone in face/chest stand out                                                                                            |  |  |
|     |                                                                                               | <b>Provide at least two signs/ symptoms</b> of Kwashiorkor in children; 1. arms looks very thin and wasted; 2. face looks very puffy due to oedema; 3. bilateral pitting oedema                                                                                                         |  |  |
|     |                                                                                               | <b>Provide at least two signs/ symptoms</b> of Marasmic Kwashiorkor in children: 1. hair silky /thin and looks reddish; 2. skin depigmentation and dermatitis especially on the legs; 3. the child is not hungry but miserable and looks dejected                                       |  |  |
| 2.8 | CHO / midwife provides health education on prevention and control of malnutrition in children | <b>Verify that the CHO / midwife provides correct information:</b>                                                                                                                                                                                                                      |  |  |
|     |                                                                                               | Give a variety of foods, enriching porridge with pounded fish, groundnut and beans                                                                                                                                                                                                      |  |  |
|     |                                                                                               | Mash food to make it soft, do not add hot spices (e.g. pepper) to the child's food, and give fruits with meals                                                                                                                                                                          |  |  |
|     |                                                                                               | Feed frequently (at least 2-4 times depending on the age of the child)                                                                                                                                                                                                                  |  |  |
|     |                                                                                               | Increase amount of food as child grows and supervise feeding if child is old enough to eat on his/her own                                                                                                                                                                               |  |  |
|     |                                                                                               | Food and utensils used for cooking and serving must be clean                                                                                                                                                                                                                            |  |  |

|            |                                                                                                   |                                                                                                                      |  |  |
|------------|---------------------------------------------------------------------------------------------------|----------------------------------------------------------------------------------------------------------------------|--|--|
|            |                                                                                                   | Encourage regular growth monitoring in children                                                                      |  |  |
| <b>3</b>   | <b>Acute care of infants and children</b>                                                         |                                                                                                                      |  |  |
| <b>3.1</b> | <b>Good interpersonal communication skills are maintained throughout the consultation</b>         | <b>Verify by interviewing / observing the following:</b>                                                             |  |  |
|            |                                                                                                   | Greets the caretaker or parent                                                                                       |  |  |
|            |                                                                                                   | Encourages the parent/caretaker to ask questions                                                                     |  |  |
|            |                                                                                                   | Uses language the caretaker (and child) understands                                                                  |  |  |
|            |                                                                                                   | Checks the mother / caretaker's understanding                                                                        |  |  |
| <b>3.2</b> | <b>Initial information on child is obtained from the caretaker / mother</b>                       | <b>Verify by interviewing / observing:</b>                                                                           |  |  |
|            |                                                                                                   | Name                                                                                                                 |  |  |
|            |                                                                                                   | Age (in months)                                                                                                      |  |  |
|            |                                                                                                   | Sex                                                                                                                  |  |  |
|            |                                                                                                   | Presence of fever, cough, diarrhea, or ear problem                                                                   |  |  |
|            |                                                                                                   | Assesses breastfeeding status                                                                                        |  |  |
|            |                                                                                                   | Checks the immunization status                                                                                       |  |  |
|            |                                                                                                   | Asks what are the child's problems                                                                                   |  |  |
|            |                                                                                                   | Asks if it is initial or follow-up visit                                                                             |  |  |
| <b>3.3</b> | <b>Initial assessment/physical examination of sick child is conducted</b>                         | <b>Verify by observing / interviewing whether the CHO asks and checks the following by using IMNCI chart booklet</b> |  |  |
|            |                                                                                                   | Check for very severe disease and need for immediate referral (general danger signs)                                 |  |  |
|            |                                                                                                   | Washes hands with soap and water and dries them, or uses alcohol hand rub                                            |  |  |
|            |                                                                                                   | Weighs the child, noting low weight for age                                                                          |  |  |
|            |                                                                                                   | Checks temperature                                                                                                   |  |  |
|            |                                                                                                   | Checks pulse                                                                                                         |  |  |
|            |                                                                                                   | Checks respiratory rate (breaths per minute)                                                                         |  |  |
|            |                                                                                                   | Checks for jaundice in the eyes, skin, palms soles                                                                   |  |  |
|            |                                                                                                   | Checks for pallor and other signs of anemia                                                                          |  |  |
|            |                                                                                                   | Check the child's immunization status                                                                                |  |  |
|            |                                                                                                   | Records the findings in the child's clinical record / card                                                           |  |  |
| <b>3.4</b> | <b>Correctly identifies, classifies and manages the infant's/child's illness: <u>jaundice</u></b> | <b>Verify by interviewing / observing:</b>                                                                           |  |  |
|            |                                                                                                   | identifies severe jaundice = jaundice in under-24-hour child or jaundice in palms/soles                              |  |  |
|            |                                                                                                   | treats severe jaundice by urgent referral and treatment to prevent low blood sugar                                   |  |  |
|            |                                                                                                   | identifies jaundice = after 24 hours of age and palms/soles are <b>not</b> yellow                                    |  |  |
|            |                                                                                                   | treats jaundice = Counsels mother to give home care and return immediately if palms/soles become yellow              |  |  |



|     |                                                                                                             |                                                                                                                                                               |  |  |
|-----|-------------------------------------------------------------------------------------------------------------|---------------------------------------------------------------------------------------------------------------------------------------------------------------|--|--|
|     |                                                                                                             | Records the classification in the child's clinical record                                                                                                     |  |  |
| 3.5 | Correctly identifies, classifies and manages the infant's/child's illness: <u>acute diarrhea</u>            | <b>Verify by interviewing / observing:</b>                                                                                                                    |  |  |
|     |                                                                                                             | checks for sunken eyes                                                                                                                                        |  |  |
|     |                                                                                                             | assesses hydration by doing skin pinch                                                                                                                        |  |  |
|     |                                                                                                             | identifies severe dehydration = presence of two signs (movement only when stimulated/no movement, sunken eyes, very slow skin pinch return)                   |  |  |
|     |                                                                                                             | manages severe dehydration = plan C if no comorbidities OR refer urgently to hospital if additional 'severe' classification                                   |  |  |
|     |                                                                                                             | identifies mild dehydration = presence of two signs (restless, irritable, sunken eyes, slow skin pinch return)                                                |  |  |
|     |                                                                                                             | manages mild dehydration = plan B and counsel mother to return immediately if not improving after 2 days OR refer urgently if another 'severe' classification |  |  |
|     |                                                                                                             | identifies no dehydration = if client does not have two conditions indicative of dehydration                                                                  |  |  |
|     |                                                                                                             | manages no dehydration = plan A (fluid, zinc, supplements and fluid) at home and counsels to return in 5 days if not improving                                |  |  |
|     |                                                                                                             | Records the classification in the child's clinical record                                                                                                     |  |  |
| 3.6 | Correctly identifies, classifies and manages the infant's/child's illness: <u>acute respiratory illness</u> | <b>Verify by interviewing / observing:</b>                                                                                                                    |  |  |
|     |                                                                                                             | assesses if child is breathing too fast = >50 breaths per minute if 2-12 months, >40 in 1-5 year olds                                                         |  |  |
|     |                                                                                                             | assesses if child has chest indrawing, stridor, or wheezing                                                                                                   |  |  |
|     |                                                                                                             | identifies severe pneumonia/very severe disease = history of coughing/breathing difficulty and any warning sign OR chest indrawing OR stridor in a calm child |  |  |
|     |                                                                                                             | identifies pneumonia = fast breathing                                                                                                                         |  |  |
|     |                                                                                                             | manages severe pneumonia / very severe disease or pneumonia = give first dose of antibiotics AND /OR refers                                                   |  |  |
|     |                                                                                                             | identifies cough / cold = no signs of pneumonia or very severe disease                                                                                        |  |  |
|     |                                                                                                             | manages wheezing child = refer                                                                                                                                |  |  |
|     |                                                                                                             | manages child with cough > 3 weeks or recurrent wheezing = referral for assessment for TB or asthma                                                           |  |  |
|     |                                                                                                             | Records the classification in the child's clinical record                                                                                                     |  |  |
| 3.7 | Correctly identifies, classifies and manages the infant's/child's illness: <u>fever</u>                     | <b>Verify by interviewing / observing:</b>                                                                                                                    |  |  |
|     |                                                                                                             | assesses for stiff neck, runny nose, swollen throat                                                                                                           |  |  |
|     |                                                                                                             | assesses for signs of measles over the last three months = rash, red eyes, coughing                                                                           |  |  |
|     |                                                                                                             | identifies very severe febrile disease = child with warning sign or stiff neck                                                                                |  |  |

|            |                                                                                                               |                                                                                                                                                                                                                                                          |  |  |
|------------|---------------------------------------------------------------------------------------------------------------|----------------------------------------------------------------------------------------------------------------------------------------------------------------------------------------------------------------------------------------------------------|--|--|
|            |                                                                                                               | manages very severe febrile disease = give first dose of quinine for malaria AND give first dose of an appropriate antibiotic AND treat the child to prevent low blood sugar AND give one dose of paracetamol for high fever (>38.5C) AND urgently refer |  |  |
|            |                                                                                                               | identifies malaria = fever without runny nose, no signs of measles, and no other visible cause of fever                                                                                                                                                  |  |  |
|            |                                                                                                               | manages malaria = give appropriate dose of ACTs AND paracetamol if high fever (>38.5C) AND review follow-up with the caregiver (return in 2 days if fever persists)                                                                                      |  |  |
|            |                                                                                                               | identifies fever - malaria unlikely = runny nose or other visible cause of fever with no signs of measles                                                                                                                                                |  |  |
|            |                                                                                                               | manages fever - malaria unlikely = give one dose of paracetamol if high fever (>38.5C) and review follow-up with caregiver (return in 2 days if fever persists)                                                                                          |  |  |
|            |                                                                                                               | Records the classification in the child's clinical record                                                                                                                                                                                                |  |  |
| <b>3.8</b> | <b>Correctly identifies, classifies and manages the infant's/child's illness: <u>measles</u></b>              | <b>Verify by interviewing / observing:</b>                                                                                                                                                                                                               |  |  |
|            |                                                                                                               | identifies severe complicated measles= signs of measles and any warning sign or clouding of cornea/extensive mouth ulcers                                                                                                                                |  |  |
|            |                                                                                                               | manages severe complicated measles = give vitamin A treatment AND give first dose of appropriate antibiotic AND refer urgently                                                                                                                           |  |  |
|            |                                                                                                               | identifies measles with eye or mouth complications = signs of measles AND pus draining from the eye OR mouth ulcers                                                                                                                                      |  |  |
|            |                                                                                                               | manages measles with eye or mouth complications = give vitamin A treatment, if applicable treat eye infection (tetracycline) or mouth ulcer (gentian violet) AND follow-up in 2 days                                                                     |  |  |
|            |                                                                                                               | identifies measles = signs of measles without other complication                                                                                                                                                                                         |  |  |
|            |                                                                                                               | manages measles = give vitamin A                                                                                                                                                                                                                         |  |  |
|            |                                                                                                               | Records the classification in the child's clinical record                                                                                                                                                                                                |  |  |
| <b>3.9</b> | <b>Correctly identifies, classifies and manages the infant's/child's illness: <u>ear pain / discharge</u></b> | <b>Verify by interviewing / observing:</b>                                                                                                                                                                                                               |  |  |
|            |                                                                                                               | Assesses swelling or pus draining in/behind ear                                                                                                                                                                                                          |  |  |
|            |                                                                                                               | identifies mastoiditis = tender swelling behind the ear                                                                                                                                                                                                  |  |  |
|            |                                                                                                               | manages mastoiditis = give first dose of appropriate antibiotic AND give first dose of paracetamol AND urgently refer                                                                                                                                    |  |  |
|            |                                                                                                               | identifies acute ear infection = pus draining from ear less than 14 days                                                                                                                                                                                 |  |  |
|            |                                                                                                               | manages acute ear infection = give appropriate antibiotic for 5 days AND give paracetamol AND follow-up in 5 days                                                                                                                                        |  |  |
|            |                                                                                                               | identifies chronic ear infection = pus draining from ear more than 14 days                                                                                                                                                                               |  |  |
|            |                                                                                                               | manages chronic ear infection = refer                                                                                                                                                                                                                    |  |  |

## Reproductive Health: 4) Family Planning; 5) HIV/AIDS and STIs; 6) Antenatal Care; 7) Safe Emergency Delivery and Newborn Resuscitation; 8) Post-natal Care and Essential Newborn Care

| 4   | Family Planning                                                                                     |                                                                                                                                                                                                                                                                                                             | Yes, No, N/A | Comments |
|-----|-----------------------------------------------------------------------------------------------------|-------------------------------------------------------------------------------------------------------------------------------------------------------------------------------------------------------------------------------------------------------------------------------------------------------------|--------------|----------|
| 4.1 | The CHO/midwife counsels clients appropriately on family planning choices                           | <b>Determined by interviewing/observing if the CHO/midwife:</b>                                                                                                                                                                                                                                             |              |          |
|     |                                                                                                     | Ensures there is adequate space and privacy (auditory and visual) to counsel clients on family planning choices                                                                                                                                                                                             |              |          |
|     |                                                                                                     | Shows respect to the client and encourages her to explain needs, concerns, and ask any questions during the session                                                                                                                                                                                         |              |          |
|     |                                                                                                     | Counsels the client about importance of spacing births: the best thing to do for her health is to space birth to pregnancy (24 months) and birth to birth (36 months)                                                                                                                                       |              |          |
|     |                                                                                                     | Discusses <b>all</b> family planning options available, including hormonal contraceptives (COC, injectables, implants), condoms, IUD, lactational amenorrhea method (LAM), mini-laparotomy                                                                                                                  |              |          |
| 4.2 | The CHO provides the client information about hormonal family planning methods (COC and injectable) | <b>Verify by observing/interviewing that the CHO discusses private with the client:</b>                                                                                                                                                                                                                     |              |          |
|     |                                                                                                     | Brands available and how often different methods are taken: COCs daily at the same time, Norigynon monthly, Noristerat every 2 months, and Depo-Provera every 3 months                                                                                                                                      |              |          |
|     |                                                                                                     | How the hormonal methods prevent pregnancy and effectiveness of each method                                                                                                                                                                                                                                 |              |          |
|     |                                                                                                     | <b>At least one advantage and</b> disadvantage of COCs: fertility returns almost immediately after stopping the pill, pill decreases menstrual flow and cramps, pill protects against ovarian and endometrial cancer; <b>disadvantage</b> - requires daily use, does not protect against STIs including HIV |              |          |
|     |                                                                                                     | <b>At least one advantage and</b> disadvantage of injectables: decrease menstrual flow and cramps, protects against ovarian and endometrial cancer, easy to use; <b>disadvantage</b> - delay in return to fertility, may cause abnormal bleeding, does not protect against STIs including HIV               |              |          |
|     |                                                                                                     | <b>At least three common</b> side effects of COCs: nausea, dizziness, breast tenderness, headaches, weight change, bleeding between periods                                                                                                                                                                 |              |          |
|     |                                                                                                     | <b>At least three common</b> side effects of injectables: irregular bleeding/spotting between periods or amenorrhea, weight gain, nausea, dizziness, breast tenderness, headaches, mood changes                                                                                                             |              |          |

|     |                                                                                                                     |                                                                                                                                                                                                                                                                                                                                                                                                                                                                                                                                                                                                                                                                                                                                                                                                                                                                                                                                                                                                                                                                                                                                                                                                                                                                                                                                                                                                                                                                                    |  |  |
|-----|---------------------------------------------------------------------------------------------------------------------|------------------------------------------------------------------------------------------------------------------------------------------------------------------------------------------------------------------------------------------------------------------------------------------------------------------------------------------------------------------------------------------------------------------------------------------------------------------------------------------------------------------------------------------------------------------------------------------------------------------------------------------------------------------------------------------------------------------------------------------------------------------------------------------------------------------------------------------------------------------------------------------------------------------------------------------------------------------------------------------------------------------------------------------------------------------------------------------------------------------------------------------------------------------------------------------------------------------------------------------------------------------------------------------------------------------------------------------------------------------------------------------------------------------------------------------------------------------------------------|--|--|
|     |                                                                                                                     | <b>All warning signals</b> for clients on any hormonal contraceptive: abdominal pain, chest pain, blurred vision, severe headache or leg pain, heavy bleeding                                                                                                                                                                                                                                                                                                                                                                                                                                                                                                                                                                                                                                                                                                                                                                                                                                                                                                                                                                                                                                                                                                                                                                                                                                                                                                                      |  |  |
| 4.3 | The CHO / midwife ensures there are no contra-indications to initiating clients on hormonal family planning methods | <b>Verify that the CHO / midwife determines if the client is medically eligible to take combined oral contraceptives (COC) or injectables:</b><br>Not currently pregnant: <7 days since last menstrual cycle <b>OR</b> abstinence since last menses <b>OR</b> correctly and consistently using a contraceptive method <b>OR</b> is within 4 weeks postpartum <b>OR</b> if < 6 months postpartum and is fully breastfeeding and no onset of menses <b>OR</b> referral for pregnancy test<br>No undiagnosed vaginal bleeding<br>Not breastfeeding a baby less than 6 weeks (injectable) <b>OR</b> 6 months old (COC)<br>Not less than 21 days postpartum in non-breastfeeding women choosing COC<br>No active liver disease (hepatitis or tumors), severe headaches/migrains, or breast cancer<br>No diabetes of > 20 years duration, history of heart disease or stroke, or uncontrolled high blood pressure (>140/90mm Hg)<br>Drug interactions: rifampicin or anticonvulsants                                                                                                                                                                                                                                                                                                                                                                                                                                                                                                     |  |  |
| 4.4 | Clients are started on their preferred method and given appropriate education/information on follow-up              | <b>Determine by if the CHO/midwife properly educates the client by interviewing / observing:</b><br>Using samples, describes how and when to start COC or injectable: in first 1-7 days of menstrual period; if after day 7, use backup method or abstain for one week<br>Describes how to continue with COC: start a new pack immediately after finishing the previous pack; if forgot to take a pill, take immediately when remember then take the next pill at the usual time. This means you may take two pills in one day. If a pill is not taken on two or more days in a row, continue with the pack if there are 7 or more active pills. If there are less than 7 active pills, discard and start a new pack immediately. Always use a back up method when a pill is missed.<br>Explains the need to use condoms or abstain from sex 7 days in case of severe diarrhea or vomiting for at least 24 hours while taking COC<br>Describes how to continue with injectables: return to the clinic for the injection every 3 months for DMPA, every 2 months for NET-EN or every month if using the monthly injection<br>Explains what is necessary if the client is late for the next injection<br>At end of the session, checks client's understanding, schedules the next visit indicating that she should return if she misses her period for 2 months while on COC or any time she has questions or concerns<br>Documents in the client's record and the facility register |  |  |
| 4.5 | The CHO administers injectable contraceptives appropriately                                                         | <b>Observe in the procedure area if the CHO:</b><br>Prepares supplies: new sterile needle, syringe; unexpired vial of DMPA, NET-EN, or Noriynon; and cotton swabs<br>Explains the procedure to the client<br>Correctly draws up the injectable contraceptive                                                                                                                                                                                                                                                                                                                                                                                                                                                                                                                                                                                                                                                                                                                                                                                                                                                                                                                                                                                                                                                                                                                                                                                                                       |  |  |

|                                                                                                                                                                                                                                             |  |  |
|---------------------------------------------------------------------------------------------------------------------------------------------------------------------------------------------------------------------------------------------|--|--|
| Adheres to infection prevention practices: undertakes hand hygiene and wipes the injection site with clean water                                                                                                                            |  |  |
| Gives the injection appropriately: inserts the needle deep into the deltoid or gluteus muscle, pulls back the plunger to ensure no blood visible, injects drug, <b>and</b> removes needle - applying pressure to injection site with cotton |  |  |

|     |                                                                                                                                       |                                                                                                                                                                |  |  |
|-----|---------------------------------------------------------------------------------------------------------------------------------------|----------------------------------------------------------------------------------------------------------------------------------------------------------------|--|--|
|     |                                                                                                                                       | Disposes needle and syringe in a puncture-resistant container, without removing, recapping or breaking the needle                                              |  |  |
|     |                                                                                                                                       | Hand hygiene is undertaken after injection is given                                                                                                            |  |  |
| 5   | HIV/AIDS and STIs                                                                                                                     |                                                                                                                                                                |  |  |
| 5.1 | Community, group and individual education is provided on how HIV is transmitted                                                       | <b>Verify by interviewing / observing if the following information is discussed:</b>                                                                           |  |  |
|     |                                                                                                                                       | sexual contact - oral, vaginal, and anal intercourse with an infected person                                                                                   |  |  |
|     |                                                                                                                                       | contaminated blood and body fluids - sharing sharps and needles contaminated with blood during shaving, barbering, scarification, tattooing, tribal marks, etc |  |  |
|     |                                                                                                                                       | contaminated blood - transfusion of infected blood                                                                                                             |  |  |
|     |                                                                                                                                       | Pregnant woman with HIV can transmit the virus to her child during pregnancy, childbirth, or through breast milk                                               |  |  |
| 5.2 | Demonstrates and provides education on condom use                                                                                     | <b>Verify by observing / interviewing that the CHO educates the client on key information on condom use:</b>                                                   |  |  |
|     |                                                                                                                                       | Check condom carefully for expiry date and any damage before removing it from the wrapper                                                                      |  |  |
|     |                                                                                                                                       | Open the packet from the rough edge, careful not to tear the condom while opening                                                                              |  |  |
|     |                                                                                                                                       | Place the condom on the dummy penis and roll down, leaving space at the tip for collection of semen during ejaculation                                         |  |  |
|     |                                                                                                                                       | Remove the penis, with the condom on, from the vagina before it becomes soft by holding the condom firmly at the base so as not to spill the semen             |  |  |
|     |                                                                                                                                       | Properly dispose of the condom by tying it and either burning or throwing away in a latrine                                                                    |  |  |
| 5.3 | Prepares client for testing, providing key information on HIV testing and counseling, emphasizing the benefits of knowing ones status | <b>Verify by interview / observation that the provider:</b>                                                                                                    |  |  |
|     |                                                                                                                                       | Greets client and assures confidentiality                                                                                                                      |  |  |
|     |                                                                                                                                       | Describes the benefits and risks of HIV testing                                                                                                                |  |  |
|     |                                                                                                                                       | Describes why to get tested                                                                                                                                    |  |  |
|     |                                                                                                                                       | Describes when to get tested?                                                                                                                                  |  |  |
|     |                                                                                                                                       | Describes how the test works and what the testing process is                                                                                                   |  |  |
|     |                                                                                                                                       | Provides information on where the closest place to get tested is                                                                                               |  |  |
| 5.4 | Prepare to perform rapid HIV test                                                                                                     | <b>Verify by interview / observation:</b>                                                                                                                      |  |  |
|     |                                                                                                                                       | Briefly explains the procedure to the client to let them know what to expect                                                                                   |  |  |
|     |                                                                                                                                       | Prepares the supplies, marking test with client information per site policy                                                                                    |  |  |
|     |                                                                                                                                       | Washes hands with soap and water and dries hands                                                                                                               |  |  |
|     |                                                                                                                                       | Puts on a pair of clean examination latex gloves                                                                                                               |  |  |
| 5.5 | HIV rapid test is performed                                                                                                           | <b>Verify by interview / observation:</b>                                                                                                                      |  |  |
|     |                                                                                                                                       | Collects peripheral blood as per standards for test                                                                                                            |  |  |
|     |                                                                                                                                       | Draws small amount (one – two drops) of blood serum onto the test as required                                                                                  |  |  |
|     |                                                                                                                                       | Applies one – two drops of buffer solution to test strip / kit / cartridge                                                                                     |  |  |
|     |                                                                                                                                       | Waits for correct amount of time (as per the test specifications) for test to develop                                                                          |  |  |

|  |  |                                                                                                                                                                                                                                                                                                                                                     |  |  |
|--|--|-----------------------------------------------------------------------------------------------------------------------------------------------------------------------------------------------------------------------------------------------------------------------------------------------------------------------------------------------------|--|--|
|  |  | Interprets the results according to the national test algorithm = if test non-reactive, reports negative test result OR if test is reactive, performs second test using another rapid test, if second test is reactive, reports positive test result, if result of second test is non-reactive, reports as indeterminate and refers for lab testing |  |  |
|--|--|-----------------------------------------------------------------------------------------------------------------------------------------------------------------------------------------------------------------------------------------------------------------------------------------------------------------------------------------------------|--|--|

|     |                                                                                                    |                                                                                                                                                                                           |  |  |
|-----|----------------------------------------------------------------------------------------------------|-------------------------------------------------------------------------------------------------------------------------------------------------------------------------------------------|--|--|
|     |                                                                                                    | Needles and syringes are disposed in a sharps container                                                                                                                                   |  |  |
|     |                                                                                                    | Washes hands with soap and water and dries them.                                                                                                                                          |  |  |
|     |                                                                                                    | Records test results                                                                                                                                                                      |  |  |
| 5.6 | The test results are given to the client                                                           | <b>Verify by interview / observation that the provider:</b>                                                                                                                               |  |  |
|     |                                                                                                    | Tells the client that the test result is positive / negative                                                                                                                              |  |  |
|     |                                                                                                    | Explains the meaning of positive / negative test results                                                                                                                                  |  |  |
|     |                                                                                                    | Assists client to express their concerns about positive / negative test results                                                                                                           |  |  |
|     |                                                                                                    | Explores client's intended actions in relation to concerns                                                                                                                                |  |  |
|     |                                                                                                    | Helps client identify with whom they can share their test results                                                                                                                         |  |  |
|     |                                                                                                    | Encourages health promoting behaviors including good nutrition, sleep and avoidance of drugs and alcohol                                                                                  |  |  |
|     |                                                                                                    | Stress the need for follow-up appointments and seeing prompt health care when sick                                                                                                        |  |  |
| 5.7 | Health education is provided to community, couples and individuals on STIs and how to prevent them | <b>Verify by observation / interview that the provider:</b>                                                                                                                               |  |  |
|     |                                                                                                    | Describes <b>at least two common symptoms</b> of STIs, which increase risk for HIV: urethral/vaginal discharge, genital ulcers, inguinal swelling, scrotal swelling, lower abdominal pain |  |  |
|     |                                                                                                    | Describes <b>at least two common adverse effects</b> of STIs: neonatal eye infections, infertility, ectopic pregnancies, still birth                                                      |  |  |
|     |                                                                                                    | Educates on how to prevent STIs - by staying with one sexual partner                                                                                                                      |  |  |
|     |                                                                                                    | Educates on how to prevent STIs - use condoms during sex                                                                                                                                  |  |  |
|     |                                                                                                    | Encourages client to seek early health care when experiencing the signs and symptoms                                                                                                      |  |  |
|     |                                                                                                    | Describes ways to reduce risk factors                                                                                                                                                     |  |  |
| 5.8 | Conducts an appropriate physical assessment in clients with signs and symptoms of STIs             | <b>Verify by interview / observation that the provider:</b>                                                                                                                               |  |  |
|     |                                                                                                    | Washes hands with soap and water and dries them, or uses alcohol hand rub                                                                                                                 |  |  |
|     |                                                                                                    | Puts on examination gloves                                                                                                                                                                |  |  |
|     |                                                                                                    | examines the male client appropriately: inspects the perineum, scrotum, penis/urethra, AND lymph nodes in the inguinal region                                                             |  |  |
|     |                                                                                                    | examines the female client appropriately: inspects the vulva and vaginal opening for discharge                                                                                            |  |  |
|     |                                                                                                    | Records findings                                                                                                                                                                          |  |  |
| 5.9 | Clients with STIs are managed appropriately                                                        | <b>Verify by interview / observation that the provider:</b>                                                                                                                               |  |  |
|     |                                                                                                    | Prescribes appropriate treatment for clients presenting symptoms OR refers client appropriately                                                                                           |  |  |
|     |                                                                                                    | Counsels the client                                                                                                                                                                       |  |  |
|     |                                                                                                    | Completes required documentation (referral form and/or register)                                                                                                                          |  |  |
|     |                                                                                                    | Discuss follow up with client to ensure treatment compliance                                                                                                                              |  |  |
| 6   | Antenatal Care                                                                                     |                                                                                                                                                                                           |  |  |
| 6.1 | Health history is obtained during                                                                  | <b>Verify by observation / interview that the provider:</b>                                                                                                                               |  |  |



|     |                                            |                                                                                                                                                                                             |  |  |
|-----|--------------------------------------------|---------------------------------------------------------------------------------------------------------------------------------------------------------------------------------------------|--|--|
|     | client consultation                        | Greets the pregnant woman and her husband/companion cordially/respectfully AND ensures privacy during the visit                                                                             |  |  |
|     |                                            | An initial rapid evaluation of the pregnant woman is conducted at the first contact - assess for danger signs                                                                               |  |  |
|     |                                            | Reviews obstetrical history                                                                                                                                                                 |  |  |
|     |                                            | Reviews medical history                                                                                                                                                                     |  |  |
|     |                                            | Determines need for tetanus toxoid immunization                                                                                                                                             |  |  |
|     |                                            | Asks for current use of tobacco, alcohol or other harmful substances                                                                                                                        |  |  |
|     |                                            | Reviews ABO and RH factor - need for testing or previous results                                                                                                                            |  |  |
|     |                                            | Determines the expected date of delivery and gestational age                                                                                                                                |  |  |
|     |                                            | Documents findings in the maternal health record book                                                                                                                                       |  |  |
| 6.2 | Anemia is identified and managed           | <b>Verify by observation / interview that the provider:</b>                                                                                                                                 |  |  |
|     |                                            | Identifies <b>at least three symptoms of anemia:</b> fatigue, loss of energy, rapid heart beat, shortness of breath, dizziness, history of abundant bleeding during menstrual periods       |  |  |
|     |                                            | Identifies <b>at least two signs of anemia:</b> conjunctival pallor, pale palms, weak pulse, elevated heart rate, elevated respirator rate (>20 per minute)                                 |  |  |
|     |                                            | Conducts diagnostic test for anemia - hemoglobin test OR refers                                                                                                                             |  |  |
|     |                                            | Manages the client according to Hemoglobin test results: Hb 7-11g/dL = investigates possible causes of anemia and addresses them according to anemia protocol OR referral if Hb <7 g/dL     |  |  |
|     |                                            | Documents findings in the maternal health record AND/OR referral document                                                                                                                   |  |  |
| 6.3 | Hypertension is identified and managed     | <b>Verify by observation / interview that the provider:</b>                                                                                                                                 |  |  |
|     |                                            | Identifies <b>at least two symptoms of uncontrolled hypertension:</b> severe headache, blurred vision, dizziness, upper abdominal pain                                                      |  |  |
|     |                                            | Measures blood pressure                                                                                                                                                                     |  |  |
|     |                                            | Manages the client according to BP: systolic or diastolic blood pressure above 130 / 90 mmHg, respectively, refers or reassures client if below these parameters                            |  |  |
|     |                                            | Performs simple proteinuria test (Use multistix)                                                                                                                                            |  |  |
|     |                                            | Manages client with proteinuria: refer                                                                                                                                                      |  |  |
|     |                                            | Explains the findings to client and subsequent follow-up                                                                                                                                    |  |  |
|     |                                            | Documents findings in the maternal health record AND/OR referral document                                                                                                                   |  |  |
| 6.4 | Fetal disorders are identified and managed | <b>Verify by observation / interview that the provider:</b>                                                                                                                                 |  |  |
|     |                                            | Performs abdominal inspection to check for fetal movement and measures fundal height                                                                                                        |  |  |
|     |                                            | Conducts appropriate physical exam according to gestational age: listens to fetal heart rate if $\geq 20$ weeks AND/OR determine fetal lie and presentation by palpation if $\geq 36$ weeks |  |  |
|     |                                            | Manages the client with abnormal findings appropriately: referral if no fetal movements OR fundal height below expected OR fetal heart rate below/over expected, OR malpresentation         |  |  |

|     |                                                                                                                          |                                                                                                                                                                                                                                                                                                                                                                                                                                                                                                                                                                                                                                                                                                                                                                                                                                                                                                                                                                                                                                                                                                                                     |  |  |
|-----|--------------------------------------------------------------------------------------------------------------------------|-------------------------------------------------------------------------------------------------------------------------------------------------------------------------------------------------------------------------------------------------------------------------------------------------------------------------------------------------------------------------------------------------------------------------------------------------------------------------------------------------------------------------------------------------------------------------------------------------------------------------------------------------------------------------------------------------------------------------------------------------------------------------------------------------------------------------------------------------------------------------------------------------------------------------------------------------------------------------------------------------------------------------------------------------------------------------------------------------------------------------------------|--|--|
|     |                                                                                                                          | Documents findings in the maternal health record AND/OR referral document                                                                                                                                                                                                                                                                                                                                                                                                                                                                                                                                                                                                                                                                                                                                                                                                                                                                                                                                                                                                                                                           |  |  |
| 6.5 | PMTCT activities are implemented for women living with HIV ( <i>conduct Standards 5.1-5.6 during ANC visit for HIV</i> ) | <b>Verify by observation / interview that the provider:</b><br>Provides necessary support to the pregnant woman and encourage partner referral for HIV testing<br>Educates the woman on use of ARVs for prevention of transmission of HIV to her child AND ART for her own health if she needs it<br>Assesses the HIV positive pregnant woman - obtains specimen to conduct CD4 test OR refers to appropriate clinic offering HIV services<br>Provides ARV or ART according to the woman's needs OR refers to appropriate clinic<br>Counsels the woman on infant feeding: exclusive BF until 6 months, complimentary feeds from 6 months, BF until 12 months OR exclusive formula for 6 months, promote good hygiene and use of clean water<br>Documents findings in the maternal health record AND/OR referral document                                                                                                                                                                                                                                                                                                            |  |  |
| 6.6 | Tuberculosis is identified and managed                                                                                   | <b>Verify by observation / interview that the provider:</b><br>Identifies <b>at least four signs/symptoms of TB:</b> history of coughing for more than one week, weight loss, night sweats, fever, chest pain, or contact with a person diagnosed with TB<br>Manages the symptomatic client appropriately: if symptomatic take sputum sample according to guidelines OR refer<br>Indicates the importance of follow-up the result of the sputum smear, irrespective of where it is obtained<br>Documents findings in the maternal health record AND/OR referral document                                                                                                                                                                                                                                                                                                                                                                                                                                                                                                                                                            |  |  |
| 6.7 | Identifies, prevents, and manages malaria in pregnancy                                                                   | <b>Verify by observation / interview that the provider:</b><br>Provides <b>at least three signs/symptoms of malaria in pregnancy:</b> asymptomatic, fever, headache, shivering,<br>Counsels on use of LLIN every night AND <b>at least two other measures</b> to take to reduce risk of malaria transmission: wear protective clothing, use repellants, manage the environment, avoid being outside late at night<br>If malaria is suspected, performs Rapid Diagnostic Test<br>If RDT is negative and malaria still suspected, request microscopy laboratory diagnosis<br>If malaria not suspected, educates the woman on the importance of taking IPT during pregnancy<br>Provides appropriate antimalarial - Malaria Intermittent Preventive Treatment (SP) for women without malaria OR appropriate treatment for women with malaria according to national guidelines OR referral if severe malaria<br>Recommends to return for IPT as needed, and if being treated for malaria, emphasizes the need to finish taking all medicines, as prescribed<br>Documents findings in the maternal health record AND/OR referral document |  |  |

|      |                                                                                                              |                                                                                                                                                                                                                                                                                                                                                        |  |  |
|------|--------------------------------------------------------------------------------------------------------------|--------------------------------------------------------------------------------------------------------------------------------------------------------------------------------------------------------------------------------------------------------------------------------------------------------------------------------------------------------|--|--|
| 6.8  | Identifies, prevents, and manages syphilis in pregnancy                                                      | <b>Verify by observation / interview that the provider:</b>                                                                                                                                                                                                                                                                                            |  |  |
|      |                                                                                                              | Provides <b>at least two signs/symptoms of syphilis:</b> sore (chancre), headache, pains, rash, lymph node swelling, patchy hair loss                                                                                                                                                                                                                  |  |  |
|      |                                                                                                              | Screens/ tests the woman for syphilis with Rapid Diagnostic Test OR other test/referral if not available                                                                                                                                                                                                                                               |  |  |
|      |                                                                                                              | Educates the woman on syphilis as an STI and consequences of untreated syphilis in pregnancy                                                                                                                                                                                                                                                           |  |  |
|      |                                                                                                              | Manages the woman appropriately - treats according to national guidelines if screen positive OR referral OR reassurance                                                                                                                                                                                                                                |  |  |
|      |                                                                                                              | Documents findings in the maternal health record AND/OR referral document                                                                                                                                                                                                                                                                              |  |  |
| 6.9  | Individualized general care and counseling based on findings and protocols is provided to the pregnant woman | <b>Verify by observation / interview that the provider:</b>                                                                                                                                                                                                                                                                                            |  |  |
|      |                                                                                                              | The client's safety is ensured by good infection prevention practices during consultation and care                                                                                                                                                                                                                                                     |  |  |
|      |                                                                                                              | Gives Ferrous Folate (60 mg Iron and 400 mcg Folic acid) once daily giving enough to last until next visit;                                                                                                                                                                                                                                            |  |  |
|      |                                                                                                              | Counsels about eating food rich in Vitamin C, and avoiding tea, coffee and colas                                                                                                                                                                                                                                                                       |  |  |
|      |                                                                                                              | Confirms tetanus vaccination status and gives tetanus toxoid (TT) if due                                                                                                                                                                                                                                                                               |  |  |
|      |                                                                                                              | Treats for helminths (Worms): gives mebendazole, 500mg OR Albendazole                                                                                                                                                                                                                                                                                  |  |  |
|      |                                                                                                              | Explains findings from the clinical history, physical examination and available laboratory tests using easy-to-understand language                                                                                                                                                                                                                     |  |  |
|      |                                                                                                              | Provides specific advice and counseling to the woman and her husband or companion as needed (i.e., common discomfort, rest, safe sex, nutrition, hygiene and breast feeding)                                                                                                                                                                           |  |  |
|      |                                                                                                              | Develops / reviews birth plan and Complication readiness plan with the woman, including preparations for normal birth and eventual emergencies                                                                                                                                                                                                         |  |  |
| 6.10 | Counsels client on pregnancy management ( Counsels Pregnant woman on abnormal conditions)                    | <b>Verify by interview / observe that the provider:</b>                                                                                                                                                                                                                                                                                                |  |  |
|      |                                                                                                              | Counsels client on managing abdominal pain AND constipation and hemorrhoids in pregnancy - positioning on side with pillow between knees, massage painful area AND increase intake of fresh fruits, vegetables, and fluids and void sitting for long periods                                                                                           |  |  |
|      |                                                                                                              | Counsels client on managing swollen ankles and feet: elevate legs and feet when sitting or lying, avoid crossing legs or standing for long periods                                                                                                                                                                                                     |  |  |
|      |                                                                                                              | Counsels client on <b>at least three ways to</b> manage nausea / vomiting: 1. eat plain dry Biscuits/Crackers; 2. eat small frequent meals; 3. avoiding overeating; 4. drink ginger or lemon in warm water to reduce the nausea; 5. sit up after meals; 6. avoid odours that induces the nausea; 7. ; 8. brush teeth / chew chewing stick after eating |  |  |
|      |                                                                                                              | Counsel client that despite common local beliefs, meat, eggs, snail and okra <b>should not be avoided</b> during pregnancy                                                                                                                                                                                                                             |  |  |
|      |                                                                                                              | Counsel client that despite common local beliefs attending ANC clinic early does not cause still birth                                                                                                                                                                                                                                                 |  |  |

|            |                                                                                          |                                                                                                                                                                                                                        |  |  |
|------------|------------------------------------------------------------------------------------------|------------------------------------------------------------------------------------------------------------------------------------------------------------------------------------------------------------------------|--|--|
|            |                                                                                          | Explains to the client the benefits of healthy timing and spacing of pregnancy                                                                                                                                         |  |  |
|            |                                                                                          | Provides information on <b>at least three post-partum contraceptive choices:</b> lactational amenorrhea, progestin-only injectables/pills, IUCD, tubal ligation, and combined oral contraceptives if not breastfeeding |  |  |
|            |                                                                                          | Counsels the client about the proper use of other family planning methods during the postpartum, including immediate postpartum methods such as the IUCD or tubal ligation                                             |  |  |
| <b>7</b>   | <b>Safe Emergency Delivery and Newborn Resuscitation</b>                                 |                                                                                                                                                                                                                        |  |  |
| <b>7.1</b> | <b>Immediate assessment of the laboring pregnant woman is conducted at first contact</b> | <b>Determine by interview / observation if the provider:</b>                                                                                                                                                           |  |  |
|            |                                                                                          | Asks for woman's antenatal card or other information if available about the history of this pregnancy and other pregnancies                                                                                            |  |  |
|            |                                                                                          | Identifies/inquires with the woman about <b>at least four danger signs:</b> 1. vaginal bleeding; 2. difficulty breathing; 3. fever;; 4. severe headaches; 5. blurred vision; 6. convulsions/fits; 7. fainting          |  |  |
|            |                                                                                          | Inquires if and when membranes "bag of waters" ruptured , including color                                                                                                                                              |  |  |
|            |                                                                                          | Washes hands with soap and water and air dry or uses alcohol hand rub before conducting physical exam                                                                                                                  |  |  |
|            |                                                                                          | Takes the woman's vital signs: BP, Pulse, Resp, AND Temp                                                                                                                                                               |  |  |
|            |                                                                                          | Times the intensity and duration of 2 contractions together                                                                                                                                                            |  |  |
|            |                                                                                          | Determines the lie AND descent of foetal head                                                                                                                                                                          |  |  |
|            |                                                                                          | Listens to the foetal heart for one full minute. If suspects foetal distress (foetal heart rate is < 110 beats per minute or > 150 beats per minute), turns mother on her left side                                    |  |  |
|            |                                                                                          | Records all information on partograph AND/OR maternal health record                                                                                                                                                    |  |  |
| <b>7.2</b> | <b>The laboring woman is prepared for delivery</b>                                       | <b>Determine by interview / observation that the provider:</b>                                                                                                                                                         |  |  |
|            |                                                                                          | Prepares basic supplies and equipment: delivery set AND neonatal resuscitation equipment/SKAMGOA AND dry towels/blankets AND oxytocin                                                                                  |  |  |
|            |                                                                                          | Washes hands , wears gloves and puts on protective clothing                                                                                                                                                            |  |  |
|            |                                                                                          | Explains to woman that she is fully dilated and that she is almost ready to start pushing                                                                                                                              |  |  |
|            |                                                                                          | Assists woman to assume the birthing position of her choice after ensuring her bladder is empty                                                                                                                        |  |  |
|            |                                                                                          | Swabs vulva and prepares area for delivery                                                                                                                                                                             |  |  |
|            |                                                                                          | Puts a clean mackintosh under her buttock and another cloth on her abdomen                                                                                                                                             |  |  |
|            |                                                                                          | Monitors for signs of second stage                                                                                                                                                                                     |  |  |
| <b>7.3</b> | <b>The second stage of labor is carefully monitored and supported (Midwife)</b>          | <b>Determine by interview / observation that the midwife:</b>                                                                                                                                                          |  |  |
|            |                                                                                          | Visually monitors the descent of the head AND the foetal heart rate after each contraction                                                                                                                             |  |  |
|            |                                                                                          | Observes duration and interval of contractions during a 10 minute period                                                                                                                                               |  |  |
|            |                                                                                          | Takes and documents vital signs: BP and pulse every 15 mins and respirations every 30 mins                                                                                                                             |  |  |
|            |                                                                                          | Urges mother to push with each contraction, but only when she has the urge to                                                                                                                                          |  |  |
|            |                                                                                          | Offers fluids at least every 2 hours                                                                                                                                                                                   |  |  |

|      |                                                                 |                                                                                                                                                                           |  |  |
|------|-----------------------------------------------------------------|---------------------------------------------------------------------------------------------------------------------------------------------------------------------------|--|--|
|      |                                                                 | Gives constant emotional support                                                                                                                                          |  |  |
|      |                                                                 | Records all information on partograph                                                                                                                                     |  |  |
| 7.4  | The baby is delivered                                           | <b>Determine by interview / observation that the midwife:</b>                                                                                                             |  |  |
|      |                                                                 | Assists the woman to push in a controlled manner, asking the mother not to push after the delivery of the head                                                            |  |  |
|      |                                                                 | Avoids harmful practices during delivery: avoids massage of the vaginal walls, does not give enema, avoids fundal pressure, avoids episiotomy unless clinically indicated |  |  |
|      |                                                                 | Feels for the cord around the neck, if slightly tight then slip over the shoulders                                                                                        |  |  |
|      |                                                                 | Allows for rotation of the head, then delivers anterior shoulder, posterior shoulder, and the rest of the body, noting the time of delivery                               |  |  |
|      |                                                                 | Delivers baby onto mother's abdomen                                                                                                                                       |  |  |
|      |                                                                 | Gently wipes, dries and wraps baby                                                                                                                                        |  |  |
|      |                                                                 | Immediately assesses the newborn: APGAR within first minute AND determine if baby needs resuscitation                                                                     |  |  |
|      |                                                                 | Clamps and cuts the cord within 3 minutes OR when the cord stops pulsating                                                                                                |  |  |
|      |                                                                 | APGAR score of the newborn is determined 5 minutes after delivery                                                                                                         |  |  |
| 7.5  | A newborn who is not breathing after delivery is resuscitated   | <b>Determine by observing demonstration that the provider knows how to resuscitate infant:</b>                                                                            |  |  |
|      |                                                                 | Clears airway, mouth first and nose if necessary                                                                                                                          |  |  |
|      |                                                                 | Positions the baby with neck slightly extended and on a firm surface, keeping baby dry and warm                                                                           |  |  |
|      |                                                                 | Selects appropriate mask AND properly positions on baby's face over chin, mouth and nose, forming a seal                                                                  |  |  |
|      |                                                                 | Pumps while checking seal: squeeze bag 2 to 3 times                                                                                                                       |  |  |
|      |                                                                 | Observes for the rise of the chest AND takes corrective action until the chest rises appropriately                                                                        |  |  |
|      |                                                                 | Ventilates the newborn with 30- 60 breaths per minute, stopping after every minute to look for spontaneous breathing                                                      |  |  |
|      |                                                                 | Continues ventilation until spontaneous cry/breathing begins AND baby's respiratory rate is maintained at 30-60 breaths per minute OR baby does not respond in 20 minutes |  |  |
|      |                                                                 | Ties cord and keeps baby dry and warm and continue to observe baby while attending to the mother                                                                          |  |  |
|      |                                                                 | Explains condition of baby to the mother or relative                                                                                                                      |  |  |
| 7.6a | (a) Active Management of the Third Stage of Labour is performed | <b>Determine by observing / interviewing that the midwife:</b>                                                                                                            |  |  |
|      |                                                                 | Gives 10 units of oxytocin intra muscularly in the mother's thigh within the first minute after delivery                                                                  |  |  |
|      |                                                                 | Waits 2 - 3 minutes and cut the cord                                                                                                                                      |  |  |

|      |                                                                                  |                                                                                                                                                                                 |  |  |
|------|----------------------------------------------------------------------------------|---------------------------------------------------------------------------------------------------------------------------------------------------------------------------------|--|--|
|      |                                                                                  | Changes gloves                                                                                                                                                                  |  |  |
|      |                                                                                  | Feels for uterine contraction, if present, positions hand at the symphysis pubis and pushes uterus gently upwards                                                               |  |  |
|      |                                                                                  | Waits for contraction and performs controlled cord traction to deliver placenta                                                                                                 |  |  |
|      |                                                                                  | Ensures uterus is contracted and massages if necessary                                                                                                                          |  |  |
|      |                                                                                  | Examines the placenta and membranes for completeness                                                                                                                            |  |  |
|      |                                                                                  | Swabs vulva and examines genital tract for tears                                                                                                                                |  |  |
|      |                                                                                  | Cleans mother and makes her comfortable                                                                                                                                         |  |  |
|      |                                                                                  | Records all information on partograph                                                                                                                                           |  |  |
| 7.6b | (b) Passive management of the third stage of labor (NON-MIDWIFE)                 | <b>Determine by observing / interviewing that the non-midwife:</b>                                                                                                              |  |  |
|      |                                                                                  | Gives mother oxytocin according to protocol                                                                                                                                     |  |  |
|      |                                                                                  | Waits 2 - 3 minutes and cuts the cord                                                                                                                                           |  |  |
|      |                                                                                  | Encourages mother to start breastfeeding                                                                                                                                        |  |  |
|      |                                                                                  | Empties the bladder                                                                                                                                                             |  |  |
|      |                                                                                  | Carefully delivers placenta without pulling on the cord (observing signs of separation of the placenta - elongation of the cord, hardening of the uterus, trickle of blood)     |  |  |
|      |                                                                                  | Ensures uterus is contracted and massages if necessary                                                                                                                          |  |  |
|      |                                                                                  | Examines placenta and membranes for completeness                                                                                                                                |  |  |
|      |                                                                                  | Cleans mother and makes her comfortable                                                                                                                                         |  |  |
|      |                                                                                  | Documents all proceedings                                                                                                                                                       |  |  |
| 8    | Post-natal Care and Essential Newborn Care                                       |                                                                                                                                                                                 |  |  |
| 8.1  | Immediate post natal care is provided to the mother for six hours after delivery | <b>Verify by interview / observation that the provider:</b>                                                                                                                     |  |  |
|      |                                                                                  | Infection prevention practices maintained during postnatal care: handwashing, glove use                                                                                         |  |  |
|      |                                                                                  | Continuously massages the woman's uterus to expel clots every 15 minutes for one hour                                                                                           |  |  |
|      |                                                                                  | Addresses the mother's questions and concerns                                                                                                                                   |  |  |
|      |                                                                                  | Gives the mother something to drink                                                                                                                                             |  |  |
|      |                                                                                  | Takes history AND conducts general examination to identify danger signs: infection, hypertensive complications, dizziness, fits, excessive bleeding, perineal swelling or tears |  |  |
|      |                                                                                  | Teaches the mother and the support person the danger signs of baby and the mother: bleeding from the cord or vagina, breathing difficulty in baby, blue lips and hands of baby  |  |  |
|      |                                                                                  | Records temperature, pulse, blood pressure, lochia and urinary output over the six hour time period                                                                             |  |  |
| 8.2  | Immediate post natal care is provided to the baby for six hours after delivery   | <b>Verify by observing / interviewing that the provider:</b>                                                                                                                    |  |  |
|      |                                                                                  | Keeps baby warm and dry, covering the baby's head and feet, avoiding bath for first 6 hours                                                                                     |  |  |

|     |                                                                                                              |                                                                                                                                                                                                            |  |  |
|-----|--------------------------------------------------------------------------------------------------------------|------------------------------------------------------------------------------------------------------------------------------------------------------------------------------------------------------------|--|--|
|     | after delivery                                                                                               | Observes the baby's overall appearance: posture, muscle tone, alertness, skin color, and movements                                                                                                         |  |  |
|     |                                                                                                              | Keeps baby with mother (bonding) and initiates breast feeding if not done already, starting Kangaroo Mother Care if newborn is underweight                                                                 |  |  |
|     |                                                                                                              | Examines head, neck, eyes, face and mouth: symmetry fontanel, moulding of head, sutures, swellings, deformities, palate, lips, eye discharge                                                               |  |  |
|     |                                                                                                              | Examines chest: rate of breathing, retraction of chest, abnormal pulsations and any secretions from the breasts                                                                                            |  |  |
|     |                                                                                                              | Examines abdomen and cord: distension, umbilical hernia, cord for bleeding, tenderness, excretion of urine and meconium/feces                                                                              |  |  |
|     |                                                                                                              | Examines external genitalia: deformities or indeterminate sex, undescended testis, labial adhesions, imperforate anus                                                                                      |  |  |
|     |                                                                                                              | Examines extremities: deformities (e.g. extra digits, webbed fingers or toes, joint movements, swellings over bones, club feet) or inability to move a limb                                                |  |  |
| 8.3 | The woman and her family are provided education on the postpartum care of the mother-baby dyad               | <b>Determined by observing / interviewing that the provider:</b>                                                                                                                                           |  |  |
|     |                                                                                                              | Educates on balanced nutrition. intake of water/other fluids, and adequate rest                                                                                                                            |  |  |
|     |                                                                                                              | Educates on importance of daily bath to keep genital areas and breasts clean and dry                                                                                                                       |  |  |
|     |                                                                                                              | Encourages emotional support from family members                                                                                                                                                           |  |  |
|     |                                                                                                              | Informs woman of family planning services available                                                                                                                                                        |  |  |
|     |                                                                                                              | Educates on importance of exclusive breast feeding                                                                                                                                                         |  |  |
|     |                                                                                                              | Educates on basic care of the newborn: keeping baby warm (head covered), allowing to sleep between feeds, bathing every 2-3 days, care of circumcised penis (males), avoid moulding of head with hot water |  |  |
|     |                                                                                                              | Educates on cord care: keep clean and exposed, only applying methylated spirit, wash hands before touching the cord                                                                                        |  |  |
|     |                                                                                                              | Educates on danger signs and when to immediately seek care: jaundice, cord infection (redness, purulent discharge), difficulty in feeding and fever                                                        |  |  |
|     |                                                                                                              | Educates on importance of immunization and growth monitoring, scheduling next clinic visit                                                                                                                 |  |  |
| 8.4 | Assessment of mother and baby is conducted on follow up postnatal visits (6 hours to 6 weeks) after delivery | <b>Verify by observing / interviewing that the provider:</b>                                                                                                                                               |  |  |
|     |                                                                                                              | Asks about the mother and baby's general wellbeing and if she has any questions or concerns                                                                                                                |  |  |
|     |                                                                                                              | Enquires about infant feeding: ease of latching on, frequency and duration of feeds, whether the baby wakes up to feed                                                                                     |  |  |
|     |                                                                                                              | Enquires about frequency of urination, educating the mother that it should be at least 6 times in 24 hours                                                                                                 |  |  |
|     |                                                                                                              | Enquires about frequency and consistency of baby's stool, educating that it should be soft, yellow and seedy but should not be watery                                                                      |  |  |
|     |                                                                                                              | Enquires about content and frequency of meals and fluid intake of the mother                                                                                                                               |  |  |
|     |                                                                                                              | Ensures the mother has taken her Vitamin A capsules                                                                                                                                                        |  |  |

|  |  |                                                                                                      |  |  |
|--|--|------------------------------------------------------------------------------------------------------|--|--|
|  |  | Is she getting enough rest?                                                                          |  |  |
|  |  | Appropriately addresses any problems of the mother and child, counseling and refering as appropriate |  |  |





# STAR CHPS ASSESSMENT

## Community Health Officer Tool 2

Funded by:



Implemented by:

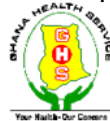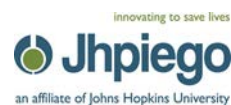

*STAR CHPS mission is to strengthen communities and boost superior performance and efficiency at CHPS Zones in the 6 coastal districts in the Western Region, thus increasing access to high quality primary healthcare to over a million residents.*

**District:** \_\_\_\_\_

**Compendium of Performance Standards for Community Health Planning and Services (CHPS)**  
*(Draft updated 11/29/2013)*

| Categories and Thematic Areas                        | Total standards | Total standards achieved | % |
|------------------------------------------------------|-----------------|--------------------------|---|
| <b>1. Standards for Community Health Officer</b>     |                 |                          |   |
| <b>A. Basic Clinical Services</b>                    |                 |                          |   |
| <b>A1. Child Health</b>                              |                 |                          |   |
| 1. Immunization                                      | 5               |                          |   |
| 2. Nutrition, Breastfeeding and Growth Monitoring    | 8               |                          |   |
| 3. IMNCI – Children less than 2 months up to 5 years | 9               |                          |   |
| <b>A2. Reproductive Health</b>                       |                 |                          |   |
| 4. Family Planning                                   | 5               |                          |   |
| 5. HIV and STI                                       | 9               |                          |   |
| 6. Antenatal Care                                    | 10              |                          |   |
| 7. Safe Emergency Delivery and Newborn Resuscitation | 6               |                          |   |
| 8. Post-natal Care and Essential Newborn Care        | 4               |                          |   |
| <b>A3. Illnesses and Emergencies</b>                 |                 |                          |   |
| 9. Infection Prevention                              | 7               |                          |   |
| 10. Malaria                                          | 4               |                          |   |
| 11. TB                                               | 2               |                          |   |
| 12. Hypertension                                     | 2               |                          |   |
| 13. Diabetes                                         | 2               |                          |   |
| 14. Sickle cell                                      | 2               |                          |   |
| 15. Elephantiasis                                    | 2               |                          |   |
| 16. Mental Health                                    | 2               |                          |   |
| 17. Diarrhoea                                        | 2               |                          |   |
| 18. Intestinal Worms                                 | 2               |                          |   |
| 19. Acute Respiratory Tract Infections               | 2               |                          |   |
| 20. First Aid and Home Emergencies                   | 11              |                          |   |
| <b>1. Community Linkages and Outreach Services</b>   |                 |                          |   |
| 21. Health Promotion and Health Education            | 5               |                          |   |

|                                                                 |   |  |  |
|-----------------------------------------------------------------|---|--|--|
| 22. Disease Surveillance                                        | 4 |  |  |
| 23. Home Visits                                                 | 2 |  |  |
| 24. School Health                                               | 6 |  |  |
| 25. Outreach Activities                                         | 2 |  |  |
| 26. Supporting Community Health Volunteers                      | 1 |  |  |
| 27. Working with the Community Health Committee                 | 4 |  |  |
| <b>2. Management of Activities, Services and Logistics</b>      |   |  |  |
| 28. Planning, implementing and managing activities              | 2 |  |  |
| 29. Logistics Management                                        | 5 |  |  |
| 30. Financial Management                                        | 8 |  |  |
| 31. Data collection, reporting, analysis and use                | 5 |  |  |
| <b>32. Standards for Community Health Volunteers</b>            |   |  |  |
| 32. Disease prevention and environmental sanitation             | 1 |  |  |
| 33. Home visiting                                               | 4 |  |  |
| 34. Home management of minor ailments                           | 2 |  |  |
| 35. Community Outreaches                                        | 7 |  |  |
| 36. Equipment, logistics and supplies                           | 2 |  |  |
| <b>37. Standards for Community Health Committee</b>             |   |  |  |
| 37. Governance, membership and operation                        | 5 |  |  |
| 38. Selection and supervision of community volunteers           | 2 |  |  |
| 39. Welfare of CHO (include Security)                           | 2 |  |  |
| 40. Facility maintenance                                        | 2 |  |  |
| 41. Resource mobilization and management                        | 3 |  |  |
| <b>42. Standards for District Health Management Team (DHMT)</b> |   |  |  |
| 41. Management of CHPS Implementation                           | 9 |  |  |
| 42. Support to CHO                                              | 3 |  |  |
| 43. Equipment                                                   | 3 |  |  |

## Gaps

[illegible]

### ACTION PLAN

| Gap Identified | Action to be taken | Person(s) responsible | Support needed | When will action be completed |
|----------------|--------------------|-----------------------|----------------|-------------------------------|
|                |                    |                       |                |                               |
|                |                    |                       |                |                               |
|                |                    |                       |                |                               |
|                |                    |                       |                |                               |
|                |                    |                       |                |                               |

**Illnesses and Emergencies:** 9) Infection Prevention 10) Malaria 11) TB 12) Hypertension 13) Diabetes 14) Sickel Cell Disease 15)Elephantiasis 16) Mental Health 17)Diarrhea 18) Worms 19)ARI 20)First Aid and Home Emergencies

| 9 Infection Prevention |                                                                                     |                                                                                                                                               | Yes, No, N/A | Comments |
|------------------------|-------------------------------------------------------------------------------------|-----------------------------------------------------------------------------------------------------------------------------------------------|--------------|----------|
| 9.1                    | Supplies needed for infection prevention and control are available and ready to use | Verify by observation / interview that the following supplies are ready to use:                                                               |              |          |
|                        |                                                                                     | Gauze/cotton wool is stored in dry and clean containers                                                                                       |              |          |
|                        |                                                                                     | Instruments are stored in dry and clean containers                                                                                            |              |          |
|                        |                                                                                     | Pick-up forceps are stored in dry and clean containers                                                                                        |              |          |
|                        |                                                                                     | Clean plastic containers with 0.5% chlorine solution are ready for use in all examination areas                                               |              |          |
|                        |                                                                                     | Sharps containers which are less than 3/4 full are available in every consultation room                                                       |              |          |
| 9.2                    | Provider correctly puts on sterile gloves                                           | Verify by observation that the provider:                                                                                                      |              |          |
|                        |                                                                                     | Picks the right size of gloves                                                                                                                |              |          |
|                        |                                                                                     | Washes and dries hands                                                                                                                        |              |          |
|                        |                                                                                     | Opens the sterile glove packet, putting the inner glove wrapper onto a clean surface with the cuffed ends facing towards the service provider |              |          |
|                        |                                                                                     | Opens the inner wrapper paper by touching the underside of the wrapper                                                                        |              |          |
|                        |                                                                                     | Opens inner wrapper and pick up a glove with the hand the glove will not go on, grabbing it by the folded back cuff                           |              |          |
|                        |                                                                                     | Slips hand into the glove, only touching the interior aspect of the glove                                                                     |              |          |
|                        |                                                                                     | Picks up the second glove with gloved hand by sliding fingertips under the sterile cuff of the second glove                                   |              |          |
|                        |                                                                                     | Pulls the glove on while unfolding the cuff by pushing it up hand with fingers of the first gloved hand which are inside of the cuff          |              |          |
| 9.3                    | The decontamination of instruments is performed properly at site of use             | Verify whether the provider correctly decontaminates equipment:                                                                               |              |          |
|                        |                                                                                     | Prepares a new chlorine solution at the beginning of each day or sooner                                                                       |              |          |
|                        |                                                                                     | Disinfects equipment between patients, as per standard procedure                                                                              |              |          |
|                        |                                                                                     | Uses chlorine diluted at 0.5%                                                                                                                 |              |          |
|                        |                                                                                     | Uses plastic containers for decontamination                                                                                                   |              |          |
|                        |                                                                                     | Soaks instruments in 0.5% chlorine solution for 10 minutes before taken to the washing/prep room in a leak proof bucket                       |              |          |

|     |                                                                                 |                                                                                                                                           |  |  |
|-----|---------------------------------------------------------------------------------|-------------------------------------------------------------------------------------------------------------------------------------------|--|--|
| 9.4 | Cleaning/sterilizing of instruments is properly performed                       | Verify whether the person cleaning the instruments complies with the following steps and recommendations:                                 |  |  |
|     |                                                                                 | There is a proper area for instrument processing / cleaning                                                                               |  |  |
|     |                                                                                 | Appropriate protective equipment is worn during the process: utility gloves, eyewear/ face shield, plastic apron, enclosed shoes/gumboots |  |  |
|     |                                                                                 | Scrubs instruments, completely removing all blood and other foreign matter with a soft brush, detergent, and chlorine solution            |  |  |
|     |                                                                                 | Rinses the instruments and other items thoroughly with clean water                                                                        |  |  |
|     |                                                                                 | Allows instruments and other items to air-dry OR dries with a clean towel (if autoclaving)                                                |  |  |
|     |                                                                                 | Washes hands with running water and soap for 10-15 seconds and dries                                                                      |  |  |
| 9.5 | The sterilization process is performed properly                                 | Verify whether high level disinfection processes are properly followed:                                                                   |  |  |
|     |                                                                                 | All cleaned, disassembled instruments are totally immersed in water before lid is closed                                                  |  |  |
|     |                                                                                 | Boils instruments for 20 minutes; counting from the time of boiling                                                                       |  |  |
|     |                                                                                 | Promptly removes instruments from boiling water with sterile forceps after 20 minutes and stores in HLD containers                        |  |  |
|     |                                                                                 | Prepares the dressings for sterilization, packing in a drum                                                                               |  |  |
| 9.6 | Soiled linen is collected and cleaned properly                                  | Verify whether the person cleaning the linens complies with the following steps and recommendations:                                      |  |  |
|     |                                                                                 | Wears protective clothing: utility gloves, eye protection, enclosed shoes                                                                 |  |  |
|     |                                                                                 | Collects and transports soiled linen in leak proof containers/plastic bags                                                                |  |  |
|     |                                                                                 | Cleans linen using detergents without acid, ammonia, or ammonium and mixed with chlorine bleach in the water                              |  |  |
|     |                                                                                 | Washes hands with soap and water after removing gloves and other personal protective equipment                                            |  |  |
| 9.7 | Waste is collected and disposed of properly to avoid injuries and contamination | Verify whether waste is collected properly:                                                                                               |  |  |
|     |                                                                                 | Wears protective clothing: utility gloves, eye protection, enclosed shoes                                                                 |  |  |
|     |                                                                                 | Collects waste in leak proof containers                                                                                                   |  |  |
|     |                                                                                 | Grounds (outside of the facility) are free of hospital waste                                                                              |  |  |
|     |                                                                                 | Person collecting waste washes hands with soap and water after removing gloves and other personal protective equipment                    |  |  |
|     |                                                                                 | Sharps containers and solid waste are incinerated                                                                                         |  |  |
|     |                                                                                 | Incineration area is not accessible to other staff, the community and domestic animals                                                    |  |  |
|     |                                                                                 | Disposed waste should be burnt after each day                                                                                             |  |  |
| 10  | Malaria                                                                         |                                                                                                                                           |  |  |

|      |                                                                                   |                                                                                                                                                                                                                                                                          |  |  |
|------|-----------------------------------------------------------------------------------|--------------------------------------------------------------------------------------------------------------------------------------------------------------------------------------------------------------------------------------------------------------------------|--|--|
| 10.1 | Provider appropriately welcomes and assesses the client suspected to have malaria | <b>Verify by interviewing/observing that the provider:</b>                                                                                                                                                                                                               |  |  |
|      |                                                                                   | Builds rapport with the client / caregiver                                                                                                                                                                                                                               |  |  |
|      |                                                                                   | Identifies <b>at least four common signs/symptoms of malaria:</b> fever, headaches, rigor (shivering), generalized body/joint pains, nausea/vomiting, loss of appetite, sweating, abdominal pain, diarrhoea, bitterness in mouth, irritability/refusal to feed (infants) |  |  |
|      |                                                                                   | Checks temperature                                                                                                                                                                                                                                                       |  |  |
|      |                                                                                   | Checks blood pressure                                                                                                                                                                                                                                                    |  |  |
|      |                                                                                   | Checks weight                                                                                                                                                                                                                                                            |  |  |
|      |                                                                                   | Checks heart rate                                                                                                                                                                                                                                                        |  |  |
|      |                                                                                   | Checks respiratory rate                                                                                                                                                                                                                                                  |  |  |
|      |                                                                                   | Records all findings in client folder                                                                                                                                                                                                                                    |  |  |
|      |                                                                                   | Checks for pallor of conjunctiva, lips and palms assessing for anemia                                                                                                                                                                                                    |  |  |
| 10.2 | Diagnosis of malaria is made with a Rapid Diagnostic Test (RDT)                   | <b>Verify by interviewing/observing that the provider:</b>                                                                                                                                                                                                               |  |  |
|      |                                                                                   | Checks the expiry date of the malaria RDT, ensuring packaging is not damaged                                                                                                                                                                                             |  |  |
|      |                                                                                   | Explains procedure to client                                                                                                                                                                                                                                             |  |  |
|      |                                                                                   | Washes hands and dries them                                                                                                                                                                                                                                              |  |  |
|      |                                                                                   | Swabs client's fingertip with alcohol swap, allowing it to dry                                                                                                                                                                                                           |  |  |
|      |                                                                                   | Hold figure firmly, pricking with lancet AND collecting sample of blood with pipette                                                                                                                                                                                     |  |  |
|      |                                                                                   | Drops blood into second hole in the cassette followed by the correct amount of buffer solution                                                                                                                                                                           |  |  |
|      |                                                                                   | Reads and records results at time stipulated by RDT manufacturer                                                                                                                                                                                                         |  |  |
|      |                                                                                   | Informs clients of results of test                                                                                                                                                                                                                                       |  |  |
|      |                                                                                   | Discards kits (Observes infection prevention precautions throughout)                                                                                                                                                                                                     |  |  |
| 10.3 | Clients diagnosed with malaria are provided appropriate care and treatment        | <b>Verify by interviewing/observing that the provider:</b>                                                                                                                                                                                                               |  |  |
|      |                                                                                   | Manages/describes how to manage high temperature in children: gives tepid sponge bath from feet to head AND gives tylenol suppository                                                                                                                                    |  |  |



|      |                                                 |                                                                                                                                                                                                                                                                                                                                                                                   |  |  |
|------|-------------------------------------------------|-----------------------------------------------------------------------------------------------------------------------------------------------------------------------------------------------------------------------------------------------------------------------------------------------------------------------------------------------------------------------------------|--|--|
|      |                                                 | Prescribes the correct dose of ACT according to weight, referring to a dosing table: Artesunate 4mg/Kg bodyweight (max 200mg) daily for 3 days; Amodiaquine 10mg/Kg bodyweight (max 600mg) OR Artemether Lumefantrine (according to dosing table for weight) twice daily for 3 days OR Dihydroartemisinin Piperaquine 1.6/12.8mg mg/kg daily for 3 days - to be taken after meals |  |  |
|      |                                                 | Provider indicates that Artemether Lumefantrine is NOT for children under 5kg or 6 months of age                                                                                                                                                                                                                                                                                  |  |  |
|      |                                                 | Prior to administering drugs to client, checks expiry date AND presence of AMFm green leaf sign on the packaging                                                                                                                                                                                                                                                                  |  |  |
|      |                                                 | Provides the patient/caregiver with information and education regarding the treatment side effects, advising to take pills after eating AND to ensure fluid intake                                                                                                                                                                                                                |  |  |
|      |                                                 | Advises client/caregiver that if vomiting occurs within 30 minutes after taking the medicine, dose of ACT should be repeated                                                                                                                                                                                                                                                      |  |  |
|      |                                                 | Encourages client to return to health facility if no improvement after 24 hours OR symptoms worsen                                                                                                                                                                                                                                                                                |  |  |
|      |                                                 | Properly identifies/describes clients requiring referral: failure to respond to therapy OR severe disease (altered consciousness, repeated convulsion, inability to feed, severe anemia, jaundice)                                                                                                                                                                                |  |  |
|      |                                                 | Properly refers/describes referral process: educate patient on need for referral AND gives IM or rectal antimalarial prior to sending (quinine or Artemether) AND completes referral form                                                                                                                                                                                         |  |  |
| 10.4 | Health education is given on malaria prevention | <b>Verify by interviewing/observing that the provider:</b>                                                                                                                                                                                                                                                                                                                        |  |  |
|      |                                                 | Reviews the cause of malaria                                                                                                                                                                                                                                                                                                                                                      |  |  |
|      |                                                 | Describes the effects of malaria during pregnancy                                                                                                                                                                                                                                                                                                                                 |  |  |
|      |                                                 | Emphasizes the importance/benefits of taking full course of SP during pregnancy AND completing treatment when diagnosed with malaria                                                                                                                                                                                                                                              |  |  |
|      |                                                 | Advises on use of LLIN every night AND <b>at least two other measures</b> to take to reduce risk of malaria transmission: wear protective clothing, use repellants, manage the environment, avoid being outside late at night, indoor residual spraying                                                                                                                           |  |  |
|      |                                                 | Distributes/posts flyers/poster on malaria information                                                                                                                                                                                                                                                                                                                            |  |  |
| 11   | Tuberculosis                                    |                                                                                                                                                                                                                                                                                                                                                                                   |  |  |
| 11.1 | People suspected to have TB are                 | <b>Verify by interview / observation that the provider:</b>                                                                                                                                                                                                                                                                                                                       |  |  |

|      |                                                                       |                                                                                                                                                                                                   |  |  |
|------|-----------------------------------------------------------------------|---------------------------------------------------------------------------------------------------------------------------------------------------------------------------------------------------|--|--|
|      | identified and managed appropriately                                  | Identifies <b>at least four</b> common signs/symptoms of TB: cough for more than two weeks, weight loss, drenching night sweats, fever, loss of appetite, chest pain, haemoptysis                 |  |  |
|      |                                                                       | Asks if the client has had close contact with anyone diagnosed with TB                                                                                                                            |  |  |
|      |                                                                       | Checks weight                                                                                                                                                                                     |  |  |
|      |                                                                       | Checks temperature                                                                                                                                                                                |  |  |
|      |                                                                       | Checks respiratory rate AND heart rate                                                                                                                                                            |  |  |
|      |                                                                       | Properly labels sputum container with client name, date of birth, and date of specimen collection                                                                                                 |  |  |
|      |                                                                       | Educates the client how to properly collect sputum into the labeled container: rinse mouth first, take 3 deep breaths, and cough specimen into the container then immediately securing the lid    |  |  |
|      |                                                                       | Requests the client to return the next day with an early morning sputum specimen (gives the patient a second labeled sputum container) as well as in 4 days to obtain results                     |  |  |
|      |                                                                       | Records that the specimen was collected in the Laboratory TB Investigation Form AND Case Identification AND Follow-up Register prior to sending specimen to the lab                               |  |  |
|      |                                                                       |                                                                                                                                                                                                   |  |  |
| 11.2 | Clients diagnosed with TB are provided appropriate care and treatment | <b>Determine by interviewing / observing that the provider:</b>                                                                                                                                   |  |  |
|      |                                                                       | Determines TB treatment dosing of client according to weight                                                                                                                                      |  |  |
|      |                                                                       | Educates the client about TB, <b>mentioning all of the following:</b> it is spread through the air by coughing; it is a disease of the lung but can affect other parts of the body; TB is curable |  |  |
|      |                                                                       | Educates the client on possible side effects of treatment, indicating when to seek care at the facility                                                                                           |  |  |
|      |                                                                       | Administers TB treatment to the client, ensuring proper number of tablets are provided AND informing client that treatment is free                                                                |  |  |
|      |                                                                       | Records dose(s) given on the patient treatment support card AND the TB client record                                                                                                              |  |  |
|      |                                                                       | Provides support to the patient on treatment, assessing their health needs and providing support to ensure adherence                                                                              |  |  |
|      |                                                                       | Traces clients in their home/community if they miss appointments                                                                                                                                  |  |  |

|      |                                                                                 |                                                                                                                                                                                                                                     |  |  |
|------|---------------------------------------------------------------------------------|-------------------------------------------------------------------------------------------------------------------------------------------------------------------------------------------------------------------------------------|--|--|
|      |                                                                                 | Encourages clients to cover the mouth with tissue or handkerchief when coughing AND always disinfect and wash it regularly                                                                                                          |  |  |
|      |                                                                                 | Offers the client testing and counseling for HIV                                                                                                                                                                                    |  |  |
| 12   | <b>Hypertension</b>                                                             |                                                                                                                                                                                                                                     |  |  |
| 12.1 | Provider appropriately assesses and diagnoses the client with hypertension      | <b>Verify by observation / interview that the provider:</b>                                                                                                                                                                         |  |  |
|      |                                                                                 | Builds rapport with the client / caregiver                                                                                                                                                                                          |  |  |
|      |                                                                                 | Checks blood pressure                                                                                                                                                                                                               |  |  |
|      |                                                                                 | Checks heart rate                                                                                                                                                                                                                   |  |  |
|      |                                                                                 | Checks respiratory rate                                                                                                                                                                                                             |  |  |
|      |                                                                                 | Identifies hypertension if systolic BP more than 130 for three consecutive checks AND/OR diastolic BP more than 90 for three consecutive checks                                                                                     |  |  |
|      |                                                                                 | Identifies <b>at least four common signs/symptoms</b> of hypertension: frequent headaches, tires easily, shortness of breath, weakness, dizziness, chest pain, asymptomatic                                                         |  |  |
| 12.2 | Clients diagnosed with hypertension are provided appropriate care and treatment | <b>Verify by observation / interview that the provider:</b>                                                                                                                                                                         |  |  |
|      |                                                                                 | <b>Educates the client on at least three ways</b> to reduce risk: weight control; reduce alcohol consumption, decrease salt intake, rest, avoid stress, avoid smoking, undertake regular exercise, and reduce saturated fat in food |  |  |
|      |                                                                                 | Informs clients why controlling blood pressure is important, <b>providing at least two examples</b> of possible effects: stroke, heart attack, congestive heart failure, enlarged heart                                             |  |  |
|      |                                                                                 | Refers newly diagnosed clients for treatment of hypertension                                                                                                                                                                        |  |  |
|      |                                                                                 | Routinely checks client's blood pressure at each visit, referring for further modification of therapy as necessary                                                                                                                  |  |  |
|      |                                                                                 | Provides support to the patient on treatment, assessing their health needs and providing support to ensure adherence                                                                                                                |  |  |
| 13   | <b>Diabetes</b>                                                                 |                                                                                                                                                                                                                                     |  |  |
| 13.1 | Provider appropriately assesses and diagnoses the client with diabetes          | <b>Verify by observation / interview that the provider:</b>                                                                                                                                                                         |  |  |
|      |                                                                                 | Builds rapport with the client / caregiver                                                                                                                                                                                          |  |  |
|      |                                                                                 | Checks blood pressure                                                                                                                                                                                                               |  |  |
|      |                                                                                 | Checks heart rate                                                                                                                                                                                                                   |  |  |
|      |                                                                                 | Checks respiratory rate                                                                                                                                                                                                             |  |  |
|      |                                                                                 | Checks weight                                                                                                                                                                                                                       |  |  |

|      |                                                                                        |                                                                                                                                                                                                                                                                             |  |  |
|------|----------------------------------------------------------------------------------------|-----------------------------------------------------------------------------------------------------------------------------------------------------------------------------------------------------------------------------------------------------------------------------|--|--|
|      |                                                                                        | Identifies <b>at least four signs/symptoms</b> of diabetes: persistent presence of high sugar level in the blood and urine; continual thirst; frequent urination; tiredness; skin itching; recurrent infections; poor wound healing; weight loss; numbness in hands or feet |  |  |
|      |                                                                                        | Indicates that diagnosis of diabetes requires a blood test to check glucose level in the blood                                                                                                                                                                              |  |  |
| 13.2 | Clients diagnosed with diabetes are provided appropriate care and treatment            | <b>Verify by observation / interview that the provider:</b>                                                                                                                                                                                                                 |  |  |
|      |                                                                                        | Educates the client on <b>at least three ways to reduce risk:</b> restrict intake of sugary food; eat foods low in starch; restrict alcohol intake; exercise regularly; eat a balanced diet consisting of fruits and vegetables;                                            |  |  |
|      |                                                                                        | Informs clients why controlling blood sugar is important, <b>providing at least two examples</b> of possible effects: stroke, loss of eye sight, kidney failure, poor circulation, sores on feet which may not heal                                                         |  |  |
|      |                                                                                        | Refers clients suspecte of having diabetes / with diabetes for diagnosis / treatment                                                                                                                                                                                        |  |  |
|      |                                                                                        | Provides support to the patient on treatment, assessing their health needs and providing support to ensure adherence                                                                                                                                                        |  |  |
| 14   | Sickle Cell Disease                                                                    |                                                                                                                                                                                                                                                                             |  |  |
| 14.1 | Provider appropriately assesses and diagnoses the client with sickle cell crises       | <b>Verify by observation / interview that the provider:</b>                                                                                                                                                                                                                 |  |  |
|      |                                                                                        | Builds rapport with the client / caregiver                                                                                                                                                                                                                                  |  |  |
|      |                                                                                        | Checks blood pressure                                                                                                                                                                                                                                                       |  |  |
|      |                                                                                        | Checks heart rate                                                                                                                                                                                                                                                           |  |  |
|      |                                                                                        | Checks respiratory rate                                                                                                                                                                                                                                                     |  |  |
|      |                                                                                        | Identifies <b>at least four common signs/symptoms</b> of sickle cell disease: joint pains; jaundice; abdominal pain; prominent forehead; thin/long hands and feet; small size for age                                                                                       |  |  |
|      |                                                                                        | Identifies <b>at least two common signs/symptoms</b> of anemia: jaundice, weakness, pallor                                                                                                                                                                                  |  |  |
| 14.2 | Clients diagnosed with sickle cell disease are provided appropriate care and treatment | <b>Verify by observation / interview that the provider:</b>                                                                                                                                                                                                                 |  |  |
|      |                                                                                        | Refers clients in sickle cell crisis for pain management                                                                                                                                                                                                                    |  |  |
|      |                                                                                        | Educates clients <b>on at least three ways to prevent sickle cell crisis:</b> drink plenty of fluids; maintain good nutrition; take folic acid daily; avoid cold temperatures; avoid high altitude; avoid overexposure of body parts                                        |  |  |
|      |                                                                                        | Encourages client to periodically check-up at a health facility                                                                                                                                                                                                             |  |  |

|      |                                                                                                         |                                                                                                                                                                                                                                                                                  |  |  |
|------|---------------------------------------------------------------------------------------------------------|----------------------------------------------------------------------------------------------------------------------------------------------------------------------------------------------------------------------------------------------------------------------------------|--|--|
| 15   | Elephantiasis / lymphatic filariasis                                                                    |                                                                                                                                                                                                                                                                                  |  |  |
| 15.1 | Provider appropriately assesses and diagnoses the client with elephantiasis / lymphatic filariasis      | Verify by observation / interview that the provider:                                                                                                                                                                                                                             |  |  |
|      |                                                                                                         | Builds rapport with the client / caregiver                                                                                                                                                                                                                                       |  |  |
|      |                                                                                                         | Checks blood pressure                                                                                                                                                                                                                                                            |  |  |
|      |                                                                                                         | Checks heart rate                                                                                                                                                                                                                                                                |  |  |
|      |                                                                                                         | Checks respiratory rate                                                                                                                                                                                                                                                          |  |  |
|      |                                                                                                         | Examines the skin                                                                                                                                                                                                                                                                |  |  |
|      |                                                                                                         | Identifies <b>at least two common signs/symptoms</b> of lymphatic filariasis: unusual swelling of legs, presence of skin folds, thickened skin,                                                                                                                                  |  |  |
| 15.2 | Clients diagnosed with Elephantiasis / Lymphatic Filariasis are provided appropriate care and treatment | Verify by observation/ interview that the provider:                                                                                                                                                                                                                              |  |  |
|      |                                                                                                         | Educates the client on the disease: that it is caused by a parasite transmitted by a mosquito that attacks the skin and the lymphatic system                                                                                                                                     |  |  |
|      |                                                                                                         | Inform the client that it is a slow disease, mostly affected in childhood but symptoms only show many years later                                                                                                                                                                |  |  |
|      |                                                                                                         | Educates client to sleep under mosquito nets at night and wear protective clothing to prevent transmission                                                                                                                                                                       |  |  |
|      |                                                                                                         | Identifies correct treatment for the disease: Albendazole 400mg AND Ivermectin 150 – 200 mcg/kg or Diethylcarbamazine                                                                                                                                                            |  |  |
|      |                                                                                                         | Refers client for treatment, documenting the referral appropriately                                                                                                                                                                                                              |  |  |
|      |                                                                                                         | Indicates importance of home visit to follow up clients with the disease AND to confirm outcome of referral                                                                                                                                                                      |  |  |
| 16   | Mental Health                                                                                           |                                                                                                                                                                                                                                                                                  |  |  |
| 16.1 | Provider appropriately assesses and diagnoses the client with mental health / behavioural problems      | Verify by interview / observation that the provider:                                                                                                                                                                                                                             |  |  |
|      |                                                                                                         | Builds rapport with the client / caregiver                                                                                                                                                                                                                                       |  |  |
|      |                                                                                                         | Checks blood pressure                                                                                                                                                                                                                                                            |  |  |
|      |                                                                                                         | Checks heart rate                                                                                                                                                                                                                                                                |  |  |
|      |                                                                                                         | Takes a health history of the client                                                                                                                                                                                                                                             |  |  |
|      |                                                                                                         | Identifies <b>at least four signs/symptoms of</b> mental health problems in children: excessive crying; withdrawal; wetting the bed; restlessness; anti-social behavior; harming self; visual / auditory hallucinations; drug addiction; repeats tasks frequently (hand washing) |  |  |

|      |                                                                                                          |                                                                                                                                                                                                                                                                                                            |  |  |
|------|----------------------------------------------------------------------------------------------------------|------------------------------------------------------------------------------------------------------------------------------------------------------------------------------------------------------------------------------------------------------------------------------------------------------------|--|--|
|      |                                                                                                          | Identifies <b>at least four signs/symptoms of</b> mental health problems in adults: persistent insomnia; anxiety; palpitations; panic; excessive quietness; odd behavior; aggressive behavior; feels depressed; suicidal tendencies; weight gain; sexual dysfunction; intellectual deficiency              |  |  |
| 16.2 | Clients with signs/symptoms or diagnosis of a mental illness are provided appropriate care and treatment | <b>Verify by interview / observation that the provider:</b>                                                                                                                                                                                                                                                |  |  |
|      |                                                                                                          | Appropriately refers the client with signs/symptoms of mental illness                                                                                                                                                                                                                                      |  |  |
|      |                                                                                                          | Follows up the client to provide support, establishing rapport with the client and his/her family                                                                                                                                                                                                          |  |  |
|      |                                                                                                          | Provides support to the patient on treatment, assessing their health needs and providing support to ensure adherence                                                                                                                                                                                       |  |  |
|      |                                                                                                          | Routinely counsels the client and his/her family                                                                                                                                                                                                                                                           |  |  |
|      |                                                                                                          | Records interaction with client in appropriate register                                                                                                                                                                                                                                                    |  |  |
| 17   | Diarrhea                                                                                                 |                                                                                                                                                                                                                                                                                                            |  |  |
| 17.1 | Provider appropriately assesses and diagnoses the client with diarrhea                                   | <b>Verify by observation / interview that the provider:</b>                                                                                                                                                                                                                                                |  |  |
|      |                                                                                                          | Builds rapport with the client / caregiver                                                                                                                                                                                                                                                                 |  |  |
|      |                                                                                                          | Checks blood pressure                                                                                                                                                                                                                                                                                      |  |  |
|      |                                                                                                          | Checks heart rate                                                                                                                                                                                                                                                                                          |  |  |
|      |                                                                                                          | Checks respiratory rate                                                                                                                                                                                                                                                                                    |  |  |
|      |                                                                                                          | Checks weight                                                                                                                                                                                                                                                                                              |  |  |
|      |                                                                                                          | Takes health history of client, identifying duration of diarrhea AND frequency and color of stools                                                                                                                                                                                                         |  |  |
|      |                                                                                                          | Identifies <b>at least four common signs/symptoms of</b> dehydration: dry mouth, sunken eyes, sunken fontanel (children), loss of elasticity of skin, rapid weak pulse, lethargy, poor feeding, thirst                                                                                                     |  |  |
| 17.2 | Clients with diarrhea are provided appropriate care and treatment                                        | <b>Verify by interview / observation that the provider:</b>                                                                                                                                                                                                                                                |  |  |
|      |                                                                                                          | Educates clients on <b>at least three ways to prevent</b> diarrhea: avoid eating and drinking contaminated food and water; wash hands before eating; prepare food hygienically; store/cover food appropriately; clean feeding bottles; improve sanitation practices around the home; reheat left over food |  |  |
|      |                                                                                                          | Educates clients <b>on at least three ways to manage</b> diarrhea and dehydration: encourage to drink large amounts of fluids; give frequent sips of fluid; give fluids until diarrhea stops; slowly reintroduce foods; continue breastfeeding in infants                                                  |  |  |

|      |                                                                                                        |                                                                                                                                                                                                                                                                     |  |  |
|------|--------------------------------------------------------------------------------------------------------|---------------------------------------------------------------------------------------------------------------------------------------------------------------------------------------------------------------------------------------------------------------------|--|--|
|      |                                                                                                        | Gives zinc supplement daily for 10 days :10mg daily for children under 6 months of age OR 20mg daily for children over 6 months of age                                                                                                                              |  |  |
|      |                                                                                                        | Demonstrates how to prepare oral rehydration salts (ORS)                                                                                                                                                                                                            |  |  |
|      |                                                                                                        | Encourages client to return to health facility if no improvement after 24 hours OR symptoms worsen                                                                                                                                                                  |  |  |
|      |                                                                                                        | Properly identifies/describes clients requiring referral: failure to respond to therapy OR severe disease                                                                                                                                                           |  |  |
| 18   | <b>Intestinal worms</b>                                                                                |                                                                                                                                                                                                                                                                     |  |  |
| 18.1 | <b>Provider appropriately assesses and diagnoses the client with intestinal worms</b>                  | <b>Verify by observation / interview that the provider:</b>                                                                                                                                                                                                         |  |  |
|      |                                                                                                        | Builds rapport with the client / caregiver                                                                                                                                                                                                                          |  |  |
|      |                                                                                                        | Checks heart rate                                                                                                                                                                                                                                                   |  |  |
|      |                                                                                                        | Checks respiratory rate                                                                                                                                                                                                                                             |  |  |
|      |                                                                                                        | Checks weight                                                                                                                                                                                                                                                       |  |  |
|      |                                                                                                        | Identifies <b>at least four common signs/symptoms</b> of intestinal worms: itching/irritation in the anus; weight loss/failure to thrive; nausea; weakness; constipation or diarrhea; abdominal pain; anaemia; dry cough; swollen abdomen; worm in stool/nose/mouth |  |  |
| 18.2 | <b>Clients with intestinal worms are provided appropriate care and treatment</b>                       | <b>Verify by interview / observation that the provider:</b>                                                                                                                                                                                                         |  |  |
|      |                                                                                                        | Educates the clients on <b>at least four ways</b> to prevent intestinal worms: use latrines; protect food from flies; cook meat well; wear footwear; periodic de-worming of children; provide good nutrition; ensure environmental hygiene                          |  |  |
|      |                                                                                                        | Provides appropriate treatment (Mebendazole or Albendazole according to protocol) for clients suspected to have intestinal worms                                                                                                                                    |  |  |
|      |                                                                                                        | Educates clients on possible side effects of treatment (e.g. nausea, vomiting)                                                                                                                                                                                      |  |  |
|      |                                                                                                        | Properly identifies/describes clients requiring referral: failure to respond to therapy OR severe disease                                                                                                                                                           |  |  |
| 19   | <b>Acute Respiratory Tract Infections</b>                                                              |                                                                                                                                                                                                                                                                     |  |  |
| 19.1 | <b>Provider appropriately assesses and diagnoses the client with acute respiratory tract infection</b> | <b>Verify by interview / observation that the provider:</b>                                                                                                                                                                                                         |  |  |
|      |                                                                                                        | Builds rapport with the client / caregiver                                                                                                                                                                                                                          |  |  |
|      |                                                                                                        | Check the temperature                                                                                                                                                                                                                                               |  |  |
|      |                                                                                                        | Checks heart rate                                                                                                                                                                                                                                                   |  |  |
|      |                                                                                                        | Checks respiratory rate                                                                                                                                                                                                                                             |  |  |
|      |                                                                                                        | Identifies <b>at least three common signs/ symptoms</b> of acute respiratory tract infection: cough, sore throat, running nose, difficulty breathing, restlessness                                                                                                  |  |  |
| 19.2 | <b>Clients with acute respiratory tract infections are provided appropriate care and treatment</b>     | <b>Verify by interview / observation that the provider:</b>                                                                                                                                                                                                         |  |  |
|      |                                                                                                        | Encourages client/caregiver to keep (child) well rehydrated                                                                                                                                                                                                         |  |  |
|      |                                                                                                        | Administers paracetamol for fever                                                                                                                                                                                                                                   |  |  |
|      |                                                                                                        | Provides amoxicillin according to weight as treatment                                                                                                                                                                                                               |  |  |
|      |                                                                                                        | Educates client to eat a balanced diet                                                                                                                                                                                                                              |  |  |

| |

|                                                                                     |  |  |
|-------------------------------------------------------------------------------------|--|--|
| Encourages client to return to health facility if no improvement OR symptoms worsen |  |  |
|-------------------------------------------------------------------------------------|--|--|



|      |                                                                                         |                                                                                                                                                                             |  |  |
|------|-----------------------------------------------------------------------------------------|-----------------------------------------------------------------------------------------------------------------------------------------------------------------------------|--|--|
|      |                                                                                         | Properly identifies/describes clients requiring referral: failure to respond to therapy OR severe disease                                                                   |  |  |
| 20   | <b>First Aid and Home Emergencies</b>                                                   |                                                                                                                                                                             |  |  |
| 20.1 | Signs and symptoms of shock are recognized and managed promptly                         | <b>Verify by interview / observation that the provider:</b>                                                                                                                 |  |  |
|      |                                                                                         | Identifies at least <b>four common signs/symptoms</b> of shock: fainting, restlessness, palpitations, pallor, sweating, confusion, coma, cold extremities, weak rapid pulse |  |  |
|      |                                                                                         | Checks blood pressure                                                                                                                                                       |  |  |
|      |                                                                                         | Checks heart rate                                                                                                                                                           |  |  |
|      |                                                                                         | Checks respiratory rate                                                                                                                                                     |  |  |
|      |                                                                                         | Checks temperature                                                                                                                                                          |  |  |
|      |                                                                                         | Positions the patient flat on the back and turn head to one side, elevating the legs except in the case of head injury                                                      |  |  |
|      |                                                                                         | Reassures and give warm fluids to conscious patients                                                                                                                        |  |  |
|      |                                                                                         | Keeps client warm                                                                                                                                                           |  |  |
|      |                                                                                         | Refers client for further investigation & treatment                                                                                                                         |  |  |
| 20.2 | Clients with animal bites are diagnosed and managed appropriately according to protocol | <b>Verify by interview / observation that the provider:</b>                                                                                                                 |  |  |
|      |                                                                                         | Builds rapport with the client / caregiver                                                                                                                                  |  |  |
|      |                                                                                         | Checks temperature                                                                                                                                                          |  |  |
|      |                                                                                         | Assesses the wound and need for intervention                                                                                                                                |  |  |
|      |                                                                                         | Irrigates/washes all cuts and scratches with soap and water                                                                                                                 |  |  |
|      |                                                                                         | Gives the individual tetanus immunization                                                                                                                                   |  |  |
|      |                                                                                         | Reassures the client                                                                                                                                                        |  |  |
|      |                                                                                         | Refers patient to the clinic for further care                                                                                                                               |  |  |
| 20.3 | Clients with snake bites are diagnosed and managed appropriately according to protocol  | <b>Verify by interview / observation that the provider:</b>                                                                                                                 |  |  |
|      |                                                                                         | Builds rapport with the client / caregiver                                                                                                                                  |  |  |
|      |                                                                                         | Checks temperature                                                                                                                                                          |  |  |
|      |                                                                                         | Washes the wound of poison, applying 'black stone' if available                                                                                                             |  |  |
|      |                                                                                         | Applies clean dressing, bandaging the affected part                                                                                                                         |  |  |
|      |                                                                                         | Immobilizes the affected part                                                                                                                                               |  |  |
|      |                                                                                         | Gives anti-snake-venom if available                                                                                                                                         |  |  |
|      |                                                                                         | Reassures the client                                                                                                                                                        |  |  |
|      |                                                                                         | Refers immediately to hospital for further management                                                                                                                       |  |  |
| 20.4 | Clients suspected of poisoning are                                                      | <b>Verify by interview / observation that the provider:</b>                                                                                                                 |  |  |

|      |                                                                                    |                                                                                                                                                                                                      |  |  |
|------|------------------------------------------------------------------------------------|------------------------------------------------------------------------------------------------------------------------------------------------------------------------------------------------------|--|--|
|      | diagnosed and managed appropriately according to protocol                          | Identifies <b>at least four common signs/symptoms</b> of poisoning: nausea, vomiting, acute abdominal pain, diarrhea, faintness, shock, loss of consciousness                                        |  |  |
|      |                                                                                    | Takes a thorough history and identifies the poison as soon as possible                                                                                                                               |  |  |
|      |                                                                                    | Checks blood pressure                                                                                                                                                                                |  |  |
|      |                                                                                    | Checks heart rate                                                                                                                                                                                    |  |  |
|      |                                                                                    | Checks respiratory rate                                                                                                                                                                              |  |  |
|      |                                                                                    | Manages the poisoned client appropriately: administers an emetic to induce vomiting OR administers antidote OR administer aperient (caster oil/epsom salt) OR administers demulcent (milk/olive oil) |  |  |
|      |                                                                                    | Reassures the client and refers as soon as possible                                                                                                                                                  |  |  |
|      |                                                                                    | Refers client as appropriate                                                                                                                                                                         |  |  |
| 20.5 | Signs and symptoms of convulsion/seizures are identified and managed appropriately | <b>Verify by interview / observation that the provider:</b>                                                                                                                                          |  |  |
|      |                                                                                    | Identifies <b>at least three common signs/symptoms</b> of seizures: violent movement of whole body or part of the body, tongue biting, foaming from the mouth, rolling of the eyes, unconsciousness  |  |  |
|      |                                                                                    | Checks heart rate                                                                                                                                                                                    |  |  |
|      |                                                                                    | Prevents the patient from falling or harming themselves, lying them down with something under the head if possible and removing them from sources of danger                                          |  |  |
|      |                                                                                    | Reassures client and family members                                                                                                                                                                  |  |  |
|      |                                                                                    | Carefully and continually monitors the client's vital signs                                                                                                                                          |  |  |
|      |                                                                                    | Determines previous history of convulsion / seizure and any medication                                                                                                                               |  |  |
|      |                                                                                    | For a child who is fitting <u>and</u> has a temperature >38 degrees C, immediately give 1 Paracetamol suppository                                                                                    |  |  |
|      |                                                                                    | Refers immediately to hospital for management                                                                                                                                                        |  |  |
| 20.6 | Provider appropriately assesses and diagnosis the client with burns                | <b>Verify by interview / observation that the provider:</b>                                                                                                                                          |  |  |
|      |                                                                                    | Immediately secures the safety of the person                                                                                                                                                         |  |  |
|      |                                                                                    | Take a health history from the client or caregiver, assessing the cause and severity of burn                                                                                                         |  |  |
|      |                                                                                    | Checks blood pressure                                                                                                                                                                                |  |  |
|      |                                                                                    | Checks heart rate                                                                                                                                                                                    |  |  |
|      |                                                                                    | Classifies the severity of the burn: first degree (swollen and red) OR second degree (blistering) OR third degree (white/black in color, full-thickness burn)                                        |  |  |

|       |                                                                                 |                                                                                                                                                                                                                                                                                                                                                                                                                                                                                                                                                                                                                                                                                                                                                                                            |  |  |
|-------|---------------------------------------------------------------------------------|--------------------------------------------------------------------------------------------------------------------------------------------------------------------------------------------------------------------------------------------------------------------------------------------------------------------------------------------------------------------------------------------------------------------------------------------------------------------------------------------------------------------------------------------------------------------------------------------------------------------------------------------------------------------------------------------------------------------------------------------------------------------------------------------|--|--|
|       |                                                                                 | Assesses/classifies the percentage of body that the burn covers: minor burn: all first and second degree burns that cover less than 10% of the body OR moderate and severe burns: involving more than 10% of the body surface area and all third degree involving more than 1%                                                                                                                                                                                                                                                                                                                                                                                                                                                                                                             |  |  |
| 20.7  | Clients with burns are provided appropriate care and treatment                  | <b>Verify by interview / observation that the provider:</b><br>Removes burnt clothing and runs cool water over the affected area<br>Gently cleans and dries the injured area<br>Applies antibiotics such as Silver Sulphadiazine to mild and moderate burns OR do not apply anything to severe burns<br>Uses a sterile bandage to cover burns<br>Gives tetanus vaccination, if required<br>Makes patient comfortable, continuously assesses breathing and pulse in those with severe burns<br>Ensure adequate hydration for mild and moderate burns<br>Refers clients with mild or moderate burns to the hospital                                                                                                                                                                          |  |  |
| 20.8  | Sprains and strains are identified and managed appropriately                    | <b>Verify by interview / observation that the provider:</b><br>Builds rapport with the client / caregiver<br>Takes an appropriate health history regarding the injury<br>Identifies <b>at least three common signs/symptoms</b> of a sprain: severe pain increasing with movement of the affected joint; marked tenderness over the site of injury; swelling over site of injury; bruising; shock if in severe pain; loss of power of affected joint<br>Assesses the injury, determining range of motion and strength<br>Educates the client to rest the injured part but do not avoid all activity<br>Educates the client to ice the area using cold pack<br>Educates the client to compress the joint with an elastic wrap or bandage<br>Educates the client to elevate the injured part |  |  |
| 20.9  | Fractures and dislocation are identified, classified, and managed appropriately | <b>Verify by interview / observation that the provider:</b><br>Obtains a comprehensive history of the injury<br>Assesses the injured area for pain, tenderness, swelling, bruising, deformity, and ability to move<br>Assess circulation of affected limb or injured area<br>Classifies the injury appropriately: simple/closed fracture OR compound/open fracture OR dislocation<br>Covers any open wound immediately with clean dressing, stopping bleeding as necessary<br>Treats the client for shock if present<br>Immobilizes the part by splinting with bandage<br>Refers client immediately                                                                                                                                                                                        |  |  |
| 20.10 | Provider appropriately assesses and manages the client with epistaxis           | <b>Verify by interview / observation the the provider:</b><br>Identifies <b>at least two common causes of nose bleed:</b> trauma, infection, rhinitis (allergic and non allergic), hypertension<br>Takes a thorough health history, identifying possible causes of epistaxis                                                                                                                                                                                                                                                                                                                                                                                                                                                                                                               |  |  |

|       |                                                    |                                                                                                                                                                                                                                                                                  |  |  |
|-------|----------------------------------------------------|----------------------------------------------------------------------------------------------------------------------------------------------------------------------------------------------------------------------------------------------------------------------------------|--|--|
|       |                                                    | Checks temperature                                                                                                                                                                                                                                                               |  |  |
|       |                                                    | Checks blood pressure                                                                                                                                                                                                                                                            |  |  |
|       |                                                    | Checks heart rate                                                                                                                                                                                                                                                                |  |  |
|       |                                                    | Controls the bleeding by having the client sit and pinch the nose for at least ten minutes while leaning slightly forward                                                                                                                                                        |  |  |
|       |                                                    | Applies cold pack / ice to nose and cheeks                                                                                                                                                                                                                                       |  |  |
|       |                                                    | Educates the client <b>on at least four factors</b> to prevent recurrent nose bleeds at home: rest with head elevated at 30 to 45 degrees; avoid putting objects in nose; avoid straining during bowel movements; avoid smoking; avoid medications that thin the blood (aspirin) |  |  |
|       |                                                    | Properly identifies/describes clients requiring referral: failure to respond to therapy                                                                                                                                                                                          |  |  |
|       |                                                    |                                                                                                                                                                                                                                                                                  |  |  |
| 20.11 | Provider appropriately assesses and dresses wounds | <b>Verify by observation / interview that the provider:</b>                                                                                                                                                                                                                      |  |  |
|       |                                                    | Wash hands and dries them                                                                                                                                                                                                                                                        |  |  |
|       |                                                    | Checks expiry date of dressing equipment and solution                                                                                                                                                                                                                            |  |  |
|       |                                                    | Sets the tray with appropriate equipment to dress the wound                                                                                                                                                                                                                      |  |  |
|       |                                                    | Explains the procedure to the client                                                                                                                                                                                                                                             |  |  |
|       |                                                    | Maintains clients privacy and comfort throughout the procedures                                                                                                                                                                                                                  |  |  |
|       |                                                    | Administers analgesics as appropriate, allowing for time to take effect                                                                                                                                                                                                          |  |  |
|       |                                                    | Washes hands and dries them                                                                                                                                                                                                                                                      |  |  |
|       |                                                    | Cleans the wound from inside to out with a series of swabs until clean and then applies dressing to the cleaned wound                                                                                                                                                            |  |  |
|       |                                                    | Discards used items, washes hands and document findings                                                                                                                                                                                                                          |  |  |

**Community Linkages and Outreach:** 21) Health Promotion and Education 22) Disease Surveillance 23) Home Visits 24) School Health 25) Outreach 26) Health Volunteers 27) Community Health Committee

| 21 Health Promotion and Health Education |                                                                                                      |                                                                                                                       | Yes, No, N/A | Comments |
|------------------------------------------|------------------------------------------------------------------------------------------------------|-----------------------------------------------------------------------------------------------------------------------|--------------|----------|
| 21.1                                     | CHO prepares for a health education and health promotion by assessing community needs systematically | Verify by interview / observation:                                                                                    |              |          |
|                                          |                                                                                                      | A community profile                                                                                                   |              |          |
|                                          |                                                                                                      | community map                                                                                                         |              |          |
|                                          |                                                                                                      | demographic register                                                                                                  |              |          |
|                                          |                                                                                                      | A community population                                                                                                |              |          |
| 21.2                                     | Outcome of community walk around is analyzed                                                         | Verify by observation/interview/records review of field reports captures the following:                               |              |          |
|                                          |                                                                                                      | priority health issues (e.g. health condition or amenities such as public toilet, drinking water)                     |              |          |
|                                          |                                                                                                      | people affected                                                                                                       |              |          |
|                                          |                                                                                                      | places where condition has been recorded                                                                              |              |          |
|                                          |                                                                                                      | possible causes of the disease / lack of amenities                                                                    |              |          |
| 21.3                                     | Health education is prioritised and planned for jointly with CHC and CHV                             | Determine by observation/interview/record review:                                                                     |              |          |
|                                          |                                                                                                      | Minutes of meeting held                                                                                               |              |          |
|                                          |                                                                                                      | findings from disease surveillance or community walk around are discussed                                             |              |          |
|                                          |                                                                                                      | action plan developed                                                                                                 |              |          |
|                                          |                                                                                                      | responsibilities are assigned                                                                                         |              |          |
|                                          |                                                                                                      | schedule developed for health education (target, topics, agenda)                                                      |              |          |
| 21.4                                     | Health education is facilitated                                                                      | Verify by interview / observation:                                                                                    |              |          |
|                                          |                                                                                                      | uses different communication mediums (e.g. dawn broadcast, community group, radio) appropriate for audience and topic |              |          |
|                                          |                                                                                                      | adapts approach for target audience (e.g. language, terminology)                                                      |              |          |
|                                          |                                                                                                      | gives accurate information                                                                                            |              |          |

|      |                                                            |                                                                                            |  |  |
|------|------------------------------------------------------------|--------------------------------------------------------------------------------------------|--|--|
|      |                                                            | determines understanding and addresses concerns and misconceptions                         |  |  |
|      |                                                            | promotes participation, questions and discussion                                           |  |  |
| 21.5 | Health education session is recorded and reported          | <b>Verify by interview / observation:</b>                                                  |  |  |
|      |                                                            | Correct report format and register                                                         |  |  |
|      |                                                            | Date, time, venue                                                                          |  |  |
|      |                                                            | Topics covered                                                                             |  |  |
|      |                                                            | Number of people participating                                                             |  |  |
|      |                                                            | Follow up actions needed                                                                   |  |  |
| 22   | Disease Surveillance                                       |                                                                                            |  |  |
| 22.1 | Diseases requiring prompt reporting are identified         | <b>Verify by interview / observation:</b>                                                  |  |  |
|      |                                                            | Cholera                                                                                    |  |  |
|      |                                                            | Meningitis                                                                                 |  |  |
|      |                                                            | Yellow Fever                                                                               |  |  |
|      |                                                            | Measles                                                                                    |  |  |
|      |                                                            | Neonatal Tetanus                                                                           |  |  |
|      |                                                            | Acute Flaccid Paralysis                                                                    |  |  |
|      |                                                            | Guinea Worm Disease                                                                        |  |  |
|      |                                                            | Buruli Ulcer                                                                               |  |  |
| 22.2 | Investigation of disease outbreaks are undertaken          | <b>Verify by interview / observation that the provider investigates:</b>                   |  |  |
|      |                                                            | Compare previous trends and record                                                         |  |  |
|      |                                                            | Who is getting the disease? (age, rich, poor, occupation)                                  |  |  |
|      |                                                            | What disease are they getting? (signs)                                                     |  |  |
|      |                                                            | When did they start getting the disease? (season)                                          |  |  |
|      |                                                            | Where do the cases come from? (location)                                                   |  |  |
|      |                                                            | Why are they getting the disease? (poor sanitation, lack of education)                     |  |  |
|      |                                                            | How are they getting infected? (by drinking, bathing, wading in a particular water source) |  |  |
|      |                                                            | Immediately take specimen from any case of flaccid paralysis                               |  |  |
| 22.3 | Community sub-structures are used for disease surveillance | <b>Verify by interview / observation:</b>                                                  |  |  |
|      |                                                            | TBAs and Traditional Healers                                                               |  |  |
|      |                                                            | Chiefs and Elders                                                                          |  |  |
|      |                                                            | Unit Committee                                                                             |  |  |
|      |                                                            | Teachers or School Children                                                                |  |  |
|      |                                                            | Community Health Committee                                                                 |  |  |

|      |                                                                   |                                                                                                                    |  |  |
|------|-------------------------------------------------------------------|--------------------------------------------------------------------------------------------------------------------|--|--|
|      |                                                                   | Area Council Members                                                                                               |  |  |
|      |                                                                   | Assembly men / women                                                                                               |  |  |
|      |                                                                   | Community Health Volunteers                                                                                        |  |  |
| 22.4 | Disease surveillance outbreaks are reported according to protocol | <b>Verify by interview / observation:</b>                                                                          |  |  |
|      |                                                                   | Correct forms are completed according to the type and severity of outbreak                                         |  |  |
|      |                                                                   | Forms are submitted at the correct time and place                                                                  |  |  |
| 23   | <b>Home Visits</b>                                                |                                                                                                                    |  |  |
| 23.1 | Special clients are prioritized for home visits                   | <b>Verify by interview / observation:</b>                                                                          |  |  |
|      |                                                                   | Malnourished child                                                                                                 |  |  |
|      |                                                                   | Buruli Ulcer patients                                                                                              |  |  |
|      |                                                                   | Aged                                                                                                               |  |  |
|      |                                                                   | Orphans                                                                                                            |  |  |
|      |                                                                   | Twin Mothers                                                                                                       |  |  |
|      |                                                                   | Postnatal mother                                                                                                   |  |  |
|      |                                                                   | HIV/AIDS patient                                                                                                   |  |  |
|      |                                                                   | Grand multiparous                                                                                                  |  |  |
|      |                                                                   | Physically and Mentally challenged people                                                                          |  |  |
|      |                                                                   | Chronically ill patients (diabetic ,hypertensive, leprosy)                                                         |  |  |
|      |                                                                   | Preterm Babies                                                                                                     |  |  |
| 23.2 | CHO prepares and adequately conducts home visits                  | <b>Verify by interview / observation:</b>                                                                          |  |  |
|      |                                                                   | Plans which area to go, arranging transport if necessary                                                           |  |  |
|      |                                                                   | Informs the CHV and CHCs at that community                                                                         |  |  |
|      |                                                                   | Checks from registers if there are special clients to see in that community                                        |  |  |
|      |                                                                   | Prepares home visiting bag                                                                                         |  |  |
|      |                                                                   | Maps out homes to be visited                                                                                       |  |  |
|      |                                                                   | Assesses the population dynamics (number of children to be immunized, number of pregnant women, etc...)            |  |  |
|      |                                                                   | Sets the schedule wheel to indicate that Home Visits are being undertaken                                          |  |  |
|      |                                                                   | Enters data on services provided during home visiting, reviewing action points                                     |  |  |
| 24   | <b>School Health</b>                                              |                                                                                                                    |  |  |
| 24.1 | CHO prepares and coordinates school health activities             | <b>Verify by interview / observation:</b>                                                                          |  |  |
|      |                                                                   | Books appointment (date and time) with the school through the School Health Education Programme (SHEP) coordinator |  |  |
|      |                                                                   | Meets with the staff of the school especially the SHEP coordinator                                                 |  |  |
|      |                                                                   | Discuss the organization of the day's activities                                                                   |  |  |
| 24.2 | Conducts health education session                                 | <b>Greets and introduces self to the students</b>                                                                  |  |  |

|      |                                                                   |                                                                                                                             |  |  |
|------|-------------------------------------------------------------------|-----------------------------------------------------------------------------------------------------------------------------|--|--|
|      | for students                                                      | Explains the purpose of the health education activity                                                                       |  |  |
|      |                                                                   | Provides tailored information on the topic chosen                                                                           |  |  |
|      |                                                                   | Speaks clearly and loudly and answers questions patiently and fully                                                         |  |  |
|      |                                                                   | Encourage pupils with individual problem to speak to the CHO after the session and assure confidentiality                   |  |  |
|      |                                                                   | Listen to, learn from and responds to the people in the group                                                               |  |  |
|      |                                                                   | Use audio visuals, job aids, teaching materials effectively                                                                 |  |  |
| 24.3 | Physical examination of school children is conducted              | <b>Verify by interview / observation:</b>                                                                                   |  |  |
|      |                                                                   | Welcome child                                                                                                               |  |  |
|      |                                                                   | Explain procedure                                                                                                           |  |  |
|      |                                                                   | Wash hands with soap and running water before and at the end of the inspection                                              |  |  |
|      |                                                                   | Use alcohol hand rub after inspecting each child                                                                            |  |  |
|      |                                                                   | Inspect each child from head to toe for abnormalities , growths, discharges, swellings, parasitic infections e.g. lice      |  |  |
|      |                                                                   | Observe for any abnormalities (including behaviour)                                                                         |  |  |
|      |                                                                   | Document findings                                                                                                           |  |  |
|      |                                                                   | Refer and hand over to SHEP coordinator                                                                                     |  |  |
| 24.4 | The physical environment of the school is inspected               | <b>Verify by interview / observation:</b>                                                                                   |  |  |
|      |                                                                   | State of school infrastructure                                                                                              |  |  |
|      |                                                                   | Sitting arrangement and capacity in a class                                                                                 |  |  |
|      |                                                                   | Ventilation in the classrooms                                                                                               |  |  |
|      |                                                                   | Availability and state of urinals and toilets                                                                               |  |  |
|      |                                                                   | Refuse disposal sites                                                                                                       |  |  |
|      |                                                                   | Recreational facilities or playground                                                                                       |  |  |
|      |                                                                   | Availability of trees to serve as wind breaks and shade for the pupils                                                      |  |  |
|      |                                                                   | Inspection of First Aid Box and its contents                                                                                |  |  |
|      |                                                                   | Inspection of health status cards of food vendors ,the types of food sold, and cleanliness of the utensils and surroundings |  |  |
|      |                                                                   | Inspection of environmental certificate                                                                                     |  |  |
|      |                                                                   | Findings recorded                                                                                                           |  |  |
| 24.5 | A debriefing session is held with the relevant school authorities | <b>Verify by interview / observation:</b>                                                                                   |  |  |
|      |                                                                   | Number of children assessed including general findings, health status, nutrition and hygiene                                |  |  |



|      |                                                                                                    |                                                                                                                                                                   |  |  |
|------|----------------------------------------------------------------------------------------------------|-------------------------------------------------------------------------------------------------------------------------------------------------------------------|--|--|
|      | before the CHO leaves the school premises                                                          | Numbers of children receiving services                                                                                                                            |  |  |
|      |                                                                                                    | Health education topics covered and number of children participating                                                                                              |  |  |
|      |                                                                                                    | Environmental findings and recommendations                                                                                                                        |  |  |
|      |                                                                                                    | Common health problems identified and actions that can be taken by the school                                                                                     |  |  |
|      |                                                                                                    | Review calendar for next visit and discuss any relevant preparations of issues to be addressed in the next visit                                                  |  |  |
| 24.6 | A report of the school visit and inspection is prepared and submitted                              | <b>Verify by interview / observation:</b>                                                                                                                         |  |  |
|      |                                                                                                    | Name, date and time of visit to the school and SHEP Coordinator contacted                                                                                         |  |  |
|      |                                                                                                    | Total number of pupils enrolled in the school, number seen and number absent                                                                                      |  |  |
|      |                                                                                                    | Findings during the examination and inspection of the environment                                                                                                 |  |  |
|      |                                                                                                    | Number of children assessed including general findings, health status, nutrition and hygiene                                                                      |  |  |
|      |                                                                                                    | Numbers of children receiving services and referred                                                                                                               |  |  |
|      |                                                                                                    | Health education topics covered and number of children participating                                                                                              |  |  |
|      |                                                                                                    | Recommendations                                                                                                                                                   |  |  |
|      |                                                                                                    | Action plan addressing health conditions and concerns                                                                                                             |  |  |
|      |                                                                                                    | Set date of next visit                                                                                                                                            |  |  |
| 25   | <b>Outreach Activities</b>                                                                         |                                                                                                                                                                   |  |  |
| 25.1 | CHO prepares for and conducts outreach services                                                    | <b>Verify by observation / interview:</b>                                                                                                                         |  |  |
|      |                                                                                                    | Inform the CHC and CHV about the date of the outreach                                                                                                             |  |  |
|      |                                                                                                    | Inform the CHC to beat the “gongong” to inform the communities about the outreach                                                                                 |  |  |
|      |                                                                                                    | Plan trip: arrange transport as needed AND pack equipment, drugs and supplies                                                                                     |  |  |
|      |                                                                                                    | Builds rapport with clients                                                                                                                                       |  |  |
|      |                                                                                                    | Give a group education                                                                                                                                            |  |  |
|      |                                                                                                    | Raises community awareness on importance of using ITNs                                                                                                            |  |  |
|      |                                                                                                    | Community mental health sessions are conducted                                                                                                                    |  |  |
|      |                                                                                                    | Provide services: nutrition counselling, growth monitoring, immunization, family planning, ANC, management of minor ailments. (CHV is trained to assist here too) |  |  |
| 25.2 | After outreach activities are conducted appropriate records are made and follow up action is taken | <b>Verify by observation/interview</b>                                                                                                                            |  |  |
|      |                                                                                                    | Tidies up the venue (in partnership with the CHV)                                                                                                                 |  |  |
|      |                                                                                                    | Pack her equipment and Logistics                                                                                                                                  |  |  |
|      |                                                                                                    | Validates and Completes tallies/records for all services provided (in partnership with CHV)                                                                       |  |  |
|      |                                                                                                    | Inform CHC and CHV about her departure                                                                                                                            |  |  |

|      |                                                                                                                           |                                                                                                                                        |  |  |
|------|---------------------------------------------------------------------------------------------------------------------------|----------------------------------------------------------------------------------------------------------------------------------------|--|--|
| 26   | <b>Supporting Community Health Volunteers</b>                                                                             |                                                                                                                                        |  |  |
| 26.1 | <b>Conducts monthly meeting with Community Health Volunteers</b>                                                          | <b>Verify by interview / observation:</b>                                                                                              |  |  |
|      |                                                                                                                           | monthly meetings with CHC to find out activities undertaken in the community (Ask for minutes of meetings)                             |  |  |
|      |                                                                                                                           | reviews Community Action Plan prepared by CHC (ask for Copy of Community Action Plan)                                                  |  |  |
|      |                                                                                                                           | reviews achievements of Community Action Plan (ask for copies of decision taken as a result of evaluation done)                        |  |  |
|      |                                                                                                                           | takes copies of records and reports submitted                                                                                          |  |  |
| 27   | <b>Working with the Community Health Committee</b>                                                                        |                                                                                                                                        |  |  |
| 27.1 | <b>Preparation is undertaken for conducting a meeting with community health committee and community health volunteers</b> | <b>Verify by interview / observation:</b>                                                                                              |  |  |
|      |                                                                                                                           | set date, time and venue of meeting with chairperson                                                                                   |  |  |
|      |                                                                                                                           | prepare any documentation, data, action plan etc for discussion                                                                        |  |  |
|      |                                                                                                                           | send reminders to committee                                                                                                            |  |  |
| 27.2 | <b>A community profile is completed for the communities served by the CHPS</b>                                            | <b>Verify by interview / observation:</b>                                                                                              |  |  |
|      |                                                                                                                           | Name of CHPS zone, including the community, including the villages that make up the community and the sub-district where it is located |  |  |
|      |                                                                                                                           | Brief description of landscape and vegetation                                                                                          |  |  |
|      |                                                                                                                           | Population of the zone or member villages                                                                                              |  |  |
|      |                                                                                                                           | Main customs and beliefs of the people (religious groupings), including health seeking behavior                                        |  |  |
|      |                                                                                                                           | Economic activities: sources of income AND markets/shops that serve the community                                                      |  |  |
|      |                                                                                                                           | Forms of transportation and communication                                                                                              |  |  |
|      |                                                                                                                           | Housing-nature and pattern of housing, including access to water and sanitation facilities                                             |  |  |
|      |                                                                                                                           | Schools and other educational facilities                                                                                               |  |  |
|      |                                                                                                                           | Health facilities (hospital, clinics, health Centre, community health compound, chemical shop, TBA compound)                           |  |  |
| 27.3 | <b>The community served is mapped</b>                                                                                     | <b>Verify by interview / observation:</b>                                                                                              |  |  |
|      |                                                                                                                           | Landmarks, land use, livestock                                                                                                         |  |  |
|      |                                                                                                                           | Water sources-rivers/streams                                                                                                           |  |  |
|      |                                                                                                                           | Schools, churches, mosques, shops, markets                                                                                             |  |  |
|      |                                                                                                                           | Number and types of houses                                                                                                             |  |  |
|      |                                                                                                                           | Health and sanitation facilities                                                                                                       |  |  |
|      |                                                                                                                           | Chief's palace and meeting grounds                                                                                                     |  |  |
|      |                                                                                                                           | Streets/roads networks and other infrastructures                                                                                       |  |  |
|      |                                                                                                                           | Police post, government office                                                                                                         |  |  |
|      |                                                                                                                           | Cemetery                                                                                                                               |  |  |
| 27.4 | <b>Supports the activities of the Community Health Committee</b>                                                          | <b>Verify by interview / observation</b>                                                                                               |  |  |
|      |                                                                                                                           | Serves as technical person in the monthly meetings of the CHC and CHVs                                                                 |  |  |
|      |                                                                                                                           | reviews minutes of the monthly meetings                                                                                                |  |  |

|                                                                  |  |  |
|------------------------------------------------------------------|--|--|
| Assist the CHC and CHVs to draw their work plan and implement it |  |  |
| Supervises and supports activities of CHC                        |  |  |

## Management: 28) Planning 29) Logistics 30) Financial Management 31) Data Collection & Reporting

| 28   | Planning, implementing and managing activities                  |                                                                                                                 | Yes, No, N/A | Comments |
|------|-----------------------------------------------------------------|-----------------------------------------------------------------------------------------------------------------|--------------|----------|
| 28.1 | A monthly plan for activities is developed                      | Verify by observation/interviewing the CHO's monthly plan for activities to see that the following is included: |              |          |
|      |                                                                 | Basic clinical services                                                                                         |              |          |
|      |                                                                 | Health education and outreach activities                                                                        |              |          |
|      |                                                                 | Ordering and receiving drugs and supplies                                                                       |              |          |
|      |                                                                 | Supervision                                                                                                     |              |          |
|      |                                                                 | Data collection, reporting                                                                                      |              |          |
|      |                                                                 | Community Health Volunteers activities                                                                          |              |          |
|      |                                                                 | Community Health Committee activities                                                                           |              |          |
|      |                                                                 | Home visits                                                                                                     |              |          |
| 28.2 | Demonstrates steps to follow in implementing planned activities | Verify by interviewing / observation: Discuss with SDHT , community health committee and CHV how to go about:   |              |          |
|      |                                                                 | Mobilize resources needed (e.g. IEC materials, contraceptives etc.)                                             |              |          |
|      |                                                                 | Record all activities. Make observations and collect information using prepared tools                           |              |          |
|      |                                                                 | Arrange a follow up visit                                                                                       |              |          |
| 29   | Logistics Management                                            |                                                                                                                 |              |          |
| 29.1 | Request for supplies follows the correct process                | Verify by interview / observation                                                                               |              |          |
|      |                                                                 | Reporting, Requisitioning, Issuing and Receipt Voucher (RRIRV) completed                                        |              |          |
|      |                                                                 | Reviewed and submitted to the regional medical stores every month (SDHT)                                        |              |          |
|      |                                                                 | Complete the receipt portion of the RRIRV on receipt of supplies                                                |              |          |
|      |                                                                 | File Waybill                                                                                                    |              |          |
|      |                                                                 | Record supplies on appropriate bin cards                                                                        |              |          |
| 29.2 | Supplies and equipment are managed                              | Verify by interview / observation:                                                                              |              |          |
|      |                                                                 | Keep up to date records of supplies by maintaining the bin cards, inventory and asset register                  |              |          |
|      |                                                                 | Order supplies and expendable materials using RRIRVs every month and conduct monthly stock taking               |              |          |
|      |                                                                 | Maintain a maximum stock of 3 months for all supplies                                                           |              |          |
|      |                                                                 | store drugs and supplies under right room temperature and conditions                                            |              |          |

|      |                                                                                                |                                                                                                                                                                  |  |  |
|------|------------------------------------------------------------------------------------------------|------------------------------------------------------------------------------------------------------------------------------------------------------------------|--|--|
|      |                                                                                                | issue drugs and supplies using the "First-to-Expire, First-Out"; and "First-In, First-Out" principle                                                             |  |  |
|      |                                                                                                | provide adequate security for supplies (e.g. storeroom locked, bars on windows, fire safety)                                                                     |  |  |
|      |                                                                                                | Compile list of unserviceable items and expired drugs                                                                                                            |  |  |
|      |                                                                                                | Inform DHD and request collection / disposal                                                                                                                     |  |  |
| 29.3 | Adequate supplies of logistics are provided to the CHVs and TBAs to carry out their activities | <b>Verify by interview / observation</b>                                                                                                                         |  |  |
|      |                                                                                                | Meets CHVs monthly to take stock                                                                                                                                 |  |  |
|      |                                                                                                | Provide drugs and logistics to CHVs as needed                                                                                                                    |  |  |
| 29.4 | Vaccines are properly stored and maintained, adhering to cold chain requirements               | <b>Verify by observation / interview:</b>                                                                                                                        |  |  |
|      |                                                                                                | Thermometer is placed inside the refrigerator AND/OR VVMs (Vaccine Vial Monitor) are used to properly to monitor temprature (inner is lighter than outer circle) |  |  |
|      |                                                                                                | Tempurature read and documented on Temperature Chart twice daily (morning and evening)                                                                           |  |  |
|      |                                                                                                | Record receipt of vaccines onto ledgers and tally sheets                                                                                                         |  |  |
|      |                                                                                                | Keep vaccines <b>in the middle part</b> of the refridgerator between *2°C and *8°C (not on the door), while maintaining diluents in the bottom                   |  |  |
|      |                                                                                                | Ice packs are packed in the freezer compartment at temperature less than 0°C to be used for Vaccine carriers and Vaccine cold box                                |  |  |
|      |                                                                                                | FIFO system used, diposing of expired vaccines appropriately                                                                                                     |  |  |
|      |                                                                                                | Do not put food and drinks in the vaccine fridge                                                                                                                 |  |  |
|      |                                                                                                | Do not open fridge door frequently                                                                                                                               |  |  |
| 29.5 | The CHPS compound is kept clean                                                                | <b>Verify the absence of dust, cobwebs, blood, rubbish, used needles, swabs and syringes in the following areas:</b>                                             |  |  |
|      |                                                                                                | Consulting room                                                                                                                                                  |  |  |
|      |                                                                                                | Instrument processing areas                                                                                                                                      |  |  |
|      |                                                                                                | Staff living area                                                                                                                                                |  |  |
|      |                                                                                                | Bathrooms                                                                                                                                                        |  |  |
|      |                                                                                                | Drug storage area                                                                                                                                                |  |  |
|      |                                                                                                | EPI area                                                                                                                                                         |  |  |
|      |                                                                                                | The area surrounding the facility                                                                                                                                |  |  |
| 30   | <b>Financial Management</b>                                                                    |                                                                                                                                                                  |  |  |
| 30.1 | Value Books are received, stored, and utilized appropriately                                   | <b>Verify by interviewing/observing the following</b>                                                                                                            |  |  |
|      |                                                                                                | Records value books serially in the stock register (used and unused)                                                                                             |  |  |
|      |                                                                                                | Keep Value books safely and restrict access (used and unused)                                                                                                    |  |  |
|      |                                                                                                | Checks if pages are intact                                                                                                                                       |  |  |
|      |                                                                                                | Issues Value Books for use                                                                                                                                       |  |  |

|      |                                                             |                                                                                                                 |  |  |
|------|-------------------------------------------------------------|-----------------------------------------------------------------------------------------------------------------|--|--|
|      |                                                             | Completes the appropriate columns in the stock register                                                         |  |  |
|      |                                                             | Ensures the recipient signs against the entries in the register                                                 |  |  |
| 30.2 | Completed Value Books are received                          | <b>Verify by interviewing/observing the following:</b>                                                          |  |  |
|      |                                                             | Checks if pages are intact                                                                                      |  |  |
|      |                                                             | Check if all leaflets are properly accounted for in the revenue collection cash book cash (in the case of GCRs) |  |  |
|      |                                                             | Records details of Completed Value Books in appropriate columns of value Book Stock Register                    |  |  |
| 30.3 | Procurements utilize Value Books appropriately              | <b>Verify by interviewing/observing the following:</b>                                                          |  |  |
|      |                                                             | Prepares requisition                                                                                            |  |  |
|      |                                                             | Seeks approval for requisition from DHD                                                                         |  |  |
|      |                                                             | Submits approved requisition for supply to the Regional Medical Stores                                          |  |  |
| 30.4 | Cash revenue is received and recorded according to protocol | <b>Verify by interviewing/observing the following:</b>                                                          |  |  |
|      |                                                             | Issues GCR to Payee                                                                                             |  |  |
|      |                                                             | Records GCR in revenue Collection cash Book                                                                     |  |  |
|      |                                                             | Hands over daily cash Collected, GCR and Revenue Collection Cash Book                                           |  |  |
|      |                                                             | Acknowledges receipt of Daily Collections and paste receipts in the revenue collection book                     |  |  |
|      |                                                             | Issues GCR to Payee                                                                                             |  |  |
| 30.5 | Revenue is banked and recorded                              | <b>Verify by interviewing/observing the following:</b>                                                          |  |  |
|      |                                                             | Prepares Bank pay-in slip in Triplicate                                                                         |  |  |
|      |                                                             | Pays Collections to the appropriate Bank Account at least weekly                                                |  |  |
|      |                                                             | Submits duplicate copy of Pay-in slip to the Sub-district/District finance Office for GCR                       |  |  |
|      |                                                             | Keep triplicate of pay-in-slips                                                                                 |  |  |
|      |                                                             | Maintains two Bank Accounts (Service and Drugs)                                                                 |  |  |
| 30.6 | National Health Insurance claims are recorded and submitted | <b>Verify by interviewing/observing the following:</b>                                                          |  |  |
|      |                                                             | Records Daily Services to Clients (e.g. NHIS) and other cooperate bodies                                        |  |  |
|      |                                                             | Compiles Daily Claims                                                                                           |  |  |
|      |                                                             | Submits Claims on a monthly basis                                                                               |  |  |
| 30.7 | Cheques are collected and banked                            | <b>Verify by interviewing/observing the following:</b>                                                          |  |  |
|      |                                                             | Ensures Banking of Cheque Collections                                                                           |  |  |
|      |                                                             | Completes pay-in slip in triplicate                                                                             |  |  |
|      |                                                             | Records in Health Facilities(HF) IGF Service Analysis Cash Book and / or HF Drug Cash Book                      |  |  |
| 30.8 | Petty Cash is managed correctly                             | <b>Verify by interviewing/observing the following:</b>                                                          |  |  |
|      |                                                             | Establishes petty Cash Float (Imprest) from the DHA                                                             |  |  |
|      |                                                             | Obtains approval of Petty Cash (Imprest)                                                                        |  |  |
|      |                                                             | Withdraws Petty Cash (Imprest)                                                                                  |  |  |
|      |                                                             | Disburses Petty Cash (Imprest)                                                                                  |  |  |
|      |                                                             | Records Petty Cash (Imprest) Payments                                                                           |  |  |
|      |                                                             | Recoups Petty Cash (Imprest) in petty cash book                                                                 |  |  |

|             |                                                                                                                                                                                                                                    |                                                                                                                                                             |  |
|-------------|------------------------------------------------------------------------------------------------------------------------------------------------------------------------------------------------------------------------------------|-------------------------------------------------------------------------------------------------------------------------------------------------------------|--|
| <b>31</b>   | <b>Data collection, reporting, analysis and use</b>                                                                                                                                                                                |                                                                                                                                                             |  |
| <b>31.1</b> | Data on all services provided are collected and recorded in the various registers                                                                                                                                                  | <b>Verify by observation / interview:</b>                                                                                                                   |  |
|             |                                                                                                                                                                                                                                    | Fills the entire applicable columns in the following registers correctly.                                                                                   |  |
|             |                                                                                                                                                                                                                                    | OPD register                                                                                                                                                |  |
|             |                                                                                                                                                                                                                                    | Immunization register                                                                                                                                       |  |
|             |                                                                                                                                                                                                                                    | Home visiting register                                                                                                                                      |  |
|             |                                                                                                                                                                                                                                    | Antenatal Care register                                                                                                                                     |  |
|             |                                                                                                                                                                                                                                    | Delivery Register                                                                                                                                           |  |
|             |                                                                                                                                                                                                                                    | Post Natal Care Register                                                                                                                                    |  |
|             |                                                                                                                                                                                                                                    | Consulting Room register (OPD)                                                                                                                              |  |
|             |                                                                                                                                                                                                                                    | Family Planning register                                                                                                                                    |  |
| <b>31.2</b> | Monthly Community-Based activities reported by CHCs and CHVs                                                                                                                                                                       | <b>Verify by observation / interview:</b>                                                                                                                   |  |
|             |                                                                                                                                                                                                                                    | Home Visiting                                                                                                                                               |  |
|             |                                                                                                                                                                                                                                    | Durbars                                                                                                                                                     |  |
|             |                                                                                                                                                                                                                                    | Malaria Case Management                                                                                                                                     |  |
|             |                                                                                                                                                                                                                                    | Health Education                                                                                                                                            |  |
|             |                                                                                                                                                                                                                                    | Environment Management                                                                                                                                      |  |
| <b>31.3</b> | CHPS data are analyzed and interpreted                                                                                                                                                                                             | <b>Verify by observation / interview:</b>                                                                                                                   |  |
|             |                                                                                                                                                                                                                                    | Displays monthly data graphically and / or tables of service delivery data at the CHPS zone (e.g. Immunization, Family Planning, ITN Use and Malaria Cases) |  |
|             |                                                                                                                                                                                                                                    | Calculates, plots and displays graphs showing coverage e.g. immunization, family planning and malaria cases                                                 |  |
|             |                                                                                                                                                                                                                                    | Compares data and trends overtime                                                                                                                           |  |
|             |                                                                                                                                                                                                                                    | Identifies gaps and priorities from the data                                                                                                                |  |
| <b>31.4</b> | CHO uses data for decision making                                                                                                                                                                                                  | <b>Verify by observation / interview:</b>                                                                                                                   |  |
|             |                                                                                                                                                                                                                                    | Monthly facility meetings are held and data is discussed e.g. utilization, disease data, service coverage, or medicine stock outs are discussed             |  |
|             |                                                                                                                                                                                                                                    | Decisions are made based on the data (Routine Health Information System) discussed                                                                          |  |
|             |                                                                                                                                                                                                                                    | Action plans are developed to implement decisions                                                                                                           |  |
|             |                                                                                                                                                                                                                                    | Meeting minutes are maintained                                                                                                                              |  |
| <b>31.5</b> | CHPS data accuracy check is performed ( If reported figure is higher than that of the register, then the data is over reporting and if the reported figure is less than what is on the register, then the data is under reporting) | <b>Complete the following information on the table below:</b>                                                                                               |  |
|             |                                                                                                                                                                                                                                    | In the first column, enter the data element of which you are assessing data quality                                                                         |  |
|             |                                                                                                                                                                                                                                    | In the second column, enter the name of the service delivery form and its corresponding register where the selected data element can be found.              |  |
|             |                                                                                                                                                                                                                                    | Randomly select two separate months reports                                                                                                                 |  |
|             |                                                                                                                                                                                                                                    | Enter the data at the appropriately at the 'months' cell and the figures reported under the report row.                                                     |  |

|                   |                                                                                               |                   |                   |
|-------------------|-----------------------------------------------------------------------------------------------|-------------------|-------------------|
|                   | Recount the figures in the register and write it down at the register column.                 |                   |                   |
|                   | Writes remarks in the Comments column ' <i>over reporting</i> ' OR ' <i>under reporting</i> ' |                   |                   |
| Data Element Name | Source ( <i>name of "reporting form" and "register"</i> )                                     | a. Month:         | b. Month:         |
|                   |                                                                                               | Report / Register | Report / Register |
| 1                 |                                                                                               |                   |                   |
| 2                 |                                                                                               |                   |                   |
| 3                 |                                                                                               |                   |                   |
| 4                 |                                                                                               |                   |                   |
| 5                 |                                                                                               |                   |                   |



## Equipment, tools, supplies, drugs

|      |                                                         |          |          |
|------|---------------------------------------------------------|----------|----------|
| 43   | Necessary equipment and supplies are available          | Yes / No | Comments |
| 43.1 | <b>Equipment</b>                                        |          |          |
|      | Salter Weighing Scale                                   |          |          |
|      | Blood Pressure Apparatus                                |          |          |
|      | Bowl to receive placenta                                |          |          |
|      | Couch                                                   |          |          |
|      | Demonstration tray, family planning                     |          |          |
|      | Fetoscope                                               |          |          |
|      | Forceps, dressing                                       |          |          |
|      | Galipots                                                |          |          |
|      | Screen or curtain                                       |          |          |
|      | Refrigerator                                            |          |          |
|      | Refrigerator thermometer                                |          |          |
|      | Adult weighing Scale                                    |          |          |
|      | Vaccine carrier                                         |          |          |
|      | Clock/watch with second hand                            |          |          |
|      | <b>Logistics</b>                                        |          |          |
|      | Cup with 100ml/50ml mark for tasting ORS solution (ORT) |          |          |
|      | Bucket, container for 0.5% chlorine                     |          |          |
|      | Bucket, container for contaminated waste                |          |          |
|      | Mackintosh sheet                                        |          |          |
|      | Benches and chairs at waiting area                      |          |          |
|      | Tape measure                                            |          |          |
|      | Weighing pant                                           |          |          |
|      | <b>Supplies</b>                                         |          |          |
|      | Information, Education and Communication materials      |          |          |
|      | Methylated Spirit                                       |          |          |
|      | Alcohol Hand Rub                                        |          |          |
|      | Plastic apron                                           |          |          |
|      | Bandages / plaster                                      |          |          |
|      | Chlorine solution or powder                             |          |          |
|      | Cotton swabs / gauze                                    |          |          |

|             |                                                                                                                                                                 |  |  |
|-------------|-----------------------------------------------------------------------------------------------------------------------------------------------------------------|--|--|
|             | Disposable syringes, 1 cc                                                                                                                                       |  |  |
|             | Disposable syringes, 5 cc                                                                                                                                       |  |  |
|             | Gloves, disposable                                                                                                                                              |  |  |
|             | Gloves, sterile                                                                                                                                                 |  |  |
|             | Gloves, utility                                                                                                                                                 |  |  |
|             | Malaria Rapid Diagnostic Test                                                                                                                                   |  |  |
|             | Scissors                                                                                                                                                        |  |  |
|             | Sheets, linen                                                                                                                                                   |  |  |
|             | Liquid soap                                                                                                                                                     |  |  |
|             | Thermometer                                                                                                                                                     |  |  |
|             | Waste containers: puncture proof for needles/syringes                                                                                                           |  |  |
|             | Water, clean                                                                                                                                                    |  |  |
| <b>43.2</b> | <b>Kits</b>                                                                                                                                                     |  |  |
|             | <b>Domiliary Midwifery kit:</b> plastic sheet, plastic apron, blade, cord ligatures, tablet of Misoprostol, cotton wool/gauze swabs, gloves, soap               |  |  |
|             | <b>Sterile Delivery set:</b> sterile gauze/cotton wool, artery forceps, disposable gloves, umbilical clamp/sterile string, scissors, sponge holding forceps (2) |  |  |
| <b>43.3</b> | <b>Monitoring and Evaluation tools</b>                                                                                                                          |  |  |
|             | Antenatal Care register                                                                                                                                         |  |  |
|             | Child Health Record Book/weighing card                                                                                                                          |  |  |
|             | Consulting Room register (OPD)                                                                                                                                  |  |  |
|             | Daily log                                                                                                                                                       |  |  |
|             | Delivery Register                                                                                                                                               |  |  |
|             | Drug register                                                                                                                                                   |  |  |
|             | Drug Bin cards                                                                                                                                                  |  |  |
|             | Family Planning register                                                                                                                                        |  |  |
|             | Family planning client record books                                                                                                                             |  |  |
|             | Family planning monthly reporting format                                                                                                                        |  |  |
|             | Immunization register                                                                                                                                           |  |  |
|             | IMNCI chart booklet                                                                                                                                             |  |  |
|             | Maternal Health Record Book                                                                                                                                     |  |  |
|             | MCH quarterly reporting format                                                                                                                                  |  |  |
|             | Monthly Morbidity Report forms                                                                                                                                  |  |  |
|             | Post Natal Care Register                                                                                                                                        |  |  |

|      |                                            |  |  |
|------|--------------------------------------------|--|--|
|      | Refrigerator temperature sheet             |  |  |
|      | School Health Registration Notebook        |  |  |
|      | TT Cards                                   |  |  |
|      | Vaccine logistics register                 |  |  |
| 44   | <b>Necessary medications are available</b> |  |  |
| 44.1 | Albendazole                                |  |  |
|      | Amoxicillin                                |  |  |
|      | Artemether + lumefantrine                  |  |  |
|      | Artesunate + amodiaquine                   |  |  |
|      | Chloramphenicol eye ointment               |  |  |
|      | Condoms                                    |  |  |
|      | Cotrimoxazole                              |  |  |
|      | Depo-Provera (DMPA):                       |  |  |
|      | Distilled water                            |  |  |
|      | Ferrous folate                             |  |  |
|      | Gentian violet, 5%                         |  |  |
|      | Mebendazole tablet                         |  |  |
|      | Metronidazole                              |  |  |
|      | Misoprostol tablet                         |  |  |
|      | Multivitamin                               |  |  |
|      | Noristerat, Norigest (NET-EN):             |  |  |
|      | Norygnon:                                  |  |  |
|      | Oral Rehydration Solution and Zinc tablet  |  |  |
|      | Oxytocin, 10 units                         |  |  |
|      | Paracetamol                                |  |  |
|      | Sulfadoxine + Pyrimethamine                |  |  |
|      | Tetanus Toxoid                             |  |  |
|      | Vitamin A                                  |  |  |
